# Supplementary material for: Clustered and diverse transcription factor binding underlies cell type specificity of enhancers for housekeeping genes
Source: HighWire-hosted journal article supplement (doi:10.1101/gr.278130.123), 2023-10-01
Supplement: Supplemental_tables.xlsx [file Supplemental_tables.xlsx]

## Sheet: Table S1
													TFBS called peaks for K562, GM12878, H1hesc and HeLa-S3 cells are downloaded from: http://hgdownload.soe.ucsc.edu/goldenPath/hg19/encodeDCC/wgEncodeAwgTfbsUniform/
													H2K27ac bam files are from: http://hgdownload.soe.ucsc.edu/goldenPath/hg19/encodeDCC/wgEncodeBroadHistone/
Data resources													RANseq data files are from : hgdownload.soe.ucsc.edu/goldenPath/hg19/encodeDCC/wgEncodeCaltechRnaSeq/
mouse										ENCODE Human cell lines
ESC					MEF					HepG2			K562			GM12878			HeLa-S3			H1hesc
	SRA accession #	PMID				SRA accession #	PMID			H3K27ac			H3K27ac			H3K27ac			H3K27ac			H3K27ac
ChIP-seq					ChIP-seq					wgEncodeBroadHistoneHepg2H3k27acStdAlnRep1.bam			wgEncodeBroadHistoneK562H3k27acStdAlnRep1.bam			wgEncodeBroadHistoneGm12878H3k27acStdAlnRep1.bam			wgEncodeBroadHistoneHelas3H3k27acStdAlnRep1.bam			wgEncodeBroadHistoneH1hescH3k27acStdAlnRep1.bam
H3K27ac	SRX4415282-SRX4415283	30532006			H3K27ac	SRX796401	26156321			wgEncodeBroadHistoneHepg2H3k27acStdAlnRep2.bam			wgEncodeBroadHistoneK562H3k27acStdAlnRep2.bam			wgEncodeBroadHistoneGm12878H3k27acStdAlnRep2.bam			wgEncodeBroadHistoneHelas3H3k27acStdAlnRep2.bam			wgEncodeBroadHistoneH1hescH3k27acStdAlnRep2.bam
H3K4me3	SRX4415276-SRX4415277	30532006			H3K4me3	SRX796418	26156321			RNAseq			RNA-seq			RNA-seq			RNA-seq			RNA-seq
NANOG	SRR5077735	28111071			CREBBP	SRR1145787	25249627			wgEncodeCaltechRnaSeqHepg2R2x75Il200SigRep1V2.bigWig			wgEncodeCaltechRnaSeqK562R2x75Il200SigRep1V2.bigWig			wgEncodeCaltechRnaSeqGm12878R2x75Il200SigRep1V2.bigWig			wgEncodeCaltechRnaSeqHelas3R2x75Il200SigRep1V2.bigWig			wgEncodeCaltechRnaSeqH1hescR2x75Th1014Il200SigRep1.bigWig
POU5F1	SRR5077690	28111071			MED1	SRR058993	20720539			wgEncodeCaltechRnaSeqHepg2R2x75Il200SigRep2V2.bigWig			wgEncodeCaltechRnaSeqK562R2x75Il200SigRep2V2.bigWig			wgEncodeCaltechRnaSeqGm12878R2x75Il200SigRep2V2.bigWig			wgEncodeCaltechRnaSeqHelas3R2x75Il200SigRep2V2.bigWig			wgEncodeCaltechRnaSeqH1hescR2x75Th1014Il200SigRep2.bigWig
SOX2	SRR5077691	28111071			KLF4	SRR5077676	28111071															wgEncodeCaltechRnaSeqH1hescR2x75Th1014Il200SigRep3.bigWig
KLF4	SRR5077692	28111071			CEBPA	SRR5077730	28111071			TF			TF			TF			TF			TF
TFCP2L1	SRR002031-SRR002034	18555785			cMyc	SRR5077677	28111071			GSM2797484	ARID3A		wgEncodeAwgTfbsBroadK562Chd1a301218aUniPk.narrowPeak			wgEncodeAwgTfbsHaibGm12878Atf2sc81188V0422111UniPk.narrowPeak			wgEncodeAwgTfbsBroadHelas3Ezh239875UniPk.narrowPeak			wgEncodeAwgTfbsBroadH1hescChd1a301218aUniPk.narrowPeak
MYC	SRR5077693	28111071			CEBPB	SRR5077732	28111071			GSM2797485	ARID4B		wgEncodeAwgTfbsBroadK562Ezh239875UniPk.narrowPeak			wgEncodeAwgTfbsHaibGm12878Atf3Pcr1xUniPk.narrowPeak			wgEncodeAwgTfbsBroadHelas3Pol2bUniPk.narrowPeak			wgEncodeAwgTfbsBroadH1hescEzh239875UniPk.narrowPeak
ESRRB	SRR5077736	28111071			FRA1	SRR5077726	28111071			GSM2797486	ARID5B		wgEncodeAwgTfbsBroadK562Hdac1sc6298UniPk.narrowPeak			wgEncodeAwgTfbsHaibGm12878BatfPcr1xUniPk.narrowPeak			wgEncodeAwgTfbsHaibHelas3GabpPcr1xUniPk.narrowPeak			wgEncodeAwgTfbsBroadH1hescJarid1aab26049UniPk.narrowPeak
EP300	SRR5077717	28111071			RUNX1	SRR5077728	28111071			GSM2797487	ASH2L		wgEncodeAwgTfbsBroadK562Hdac2a300705aUniPk.narrowPeak			wgEncodeAwgTfbsHaibGm12878Bcl11aPcr1xUniPk.narrowPeak			wgEncodeAwgTfbsHaibHelas3NrsfPcr1xUniPk.narrowPeak			wgEncodeAwgTfbsBroadH1hescRbbp5a300109aUniPk.narrowPeak
	SRR066788, SRR066789	21106759			EP300	SRR5077714	28111071			GSM2797488	ATF1		wgEncodeAwgTfbsBroadK562Hdac6a301341aUniPk.narrowPeak			wgEncodeAwgTfbsHaibGm12878Bcl3V0416101UniPk.narrowPeak			wgEncodeAwgTfbsHaibHelas3Pol2Pcr1xUniPk.narrowPeak			wgEncodeAwgTfbsHaibH1hescAtf2sc81188V0422111UniPk.narrowPeak
MED1	SRR058988	23582322			Pol II	SRR1578133	25512519			GSM2797489	ATF3		wgEncodeAwgTfbsBroadK562P300UniPk.narrowPeak			wgEncodeAwgTfbsHaibGm12878Bclaf101388V0416101UniPk.narrowPeak			wgEncodeAwgTfbsHaibHelas3Taf1Pcr1xUniPk.narrowPeak			wgEncodeAwgTfbsHaibH1hescAtf3V0416102UniPk.narrowPeak
	SRR620141	23582322			BRG1	SRR5077722	28111071			GSM2797490	ATF4		wgEncodeAwgTfbsBroadK562Phf8a301772aUniPk.narrowPeak			wgEncodeAwgTfbsHaibGm12878Cebpbsc150V0422111UniPk.narrowPeak			wgEncodeAwgTfbsSydhHelas3Ap2alphaUniPk.narrowPeak			wgEncodeAwgTfbsHaibH1hescBcl11aPcr1xUniPk.narrowPeak
MED12	SRR058986	23582322			RNAseq	SRX4451037-SRX4451039	30532006			GSM2797491	BACH1		wgEncodeAwgTfbsBroadK562Plu1UniPk.narrowPeak			wgEncodeAwgTfbsHaibGm12878Ebf1sc137065Pcr1xUniPk.narrowPeak			wgEncodeAwgTfbsSydhHelas3Ap2gammaUniPk.narrowPeak			wgEncodeAwgTfbsHaibH1hescEgr1V0416102UniPk.narrowPeak
BRD4	SRR4423551	29662175								GSM2797492	BCL6_iso1		wgEncodeAwgTfbsBroadK562Pol2bUniPk.narrowPeak			wgEncodeAwgTfbsHaibGm12878Egr1Pcr2xUniPk.narrowPeak			wgEncodeAwgTfbsSydhHelas3Baf155IggmusUniPk.narrowPeak			wgEncodeAwgTfbsHaibH1hescFosl1sc183V0416102UniPk.narrowPeak
E2F1	SRR001988-SRR001991	18555785								GSM2797493	BHLHE40		wgEncodeAwgTfbsBroadK562Rbbp5a300109aUniPk.narrowPeak			wgEncodeAwgTfbsHaibGm12878Elf1sc631V0416101UniPk.narrowPeak			wgEncodeAwgTfbsSydhHelas3Baf170IggmusUniPk.narrowPeak			wgEncodeAwgTfbsHaibH1hescGabpPcr1xUniPk.narrowPeak
Pol II	SRR5466757, SRR5466758	28483418								GSM2797494	BMI1		wgEncodeAwgTfbsBroadK562Sap3039731UniPk.narrowPeak			wgEncodeAwgTfbsHaibGm12878Ets1Pcr1xUniPk.narrowPeak			wgEncodeAwgTfbsSydhHelas3Bdp1UniPk.narrowPeak			wgEncodeAwgTfbsHaibH1hescHdac2sc6296V0416102UniPk.narrowPeak
BRG1	SRR5077725	28111071								GSM2797495	BRCA1		wgEncodeAwgTfbsHaibK562Atf3V0416101UniPk.narrowPeak			wgEncodeAwgTfbsHaibGm12878Foxm1sc502V0422111UniPk.narrowPeak			wgEncodeAwgTfbsSydhHelas3Brca1a300IggrabUniPk.narrowPeak			wgEncodeAwgTfbsHaibH1hescJundV0416102UniPk.narrowPeak
RNAseq	SRP154652	30532006								GSM2797496	BRD4		wgEncodeAwgTfbsHaibK562Bcl3Pcr1xUniPk.narrowPeak			wgEncodeAwgTfbsHaibGm12878GabpPcr2xUniPk.narrowPeak			wgEncodeAwgTfbsSydhHelas3Brf1UniPk.narrowPeak			wgEncodeAwgTfbsHaibH1hescNanogsc33759V0416102UniPk.narrowPeak
										GSM2797497	CBX1		wgEncodeAwgTfbsHaibK562Bclaf101388Pcr1xUniPk.narrowPeak			wgEncodeAwgTfbsHaibGm12878Irf4sc6059Pcr1xUniPk.narrowPeak			wgEncodeAwgTfbsSydhHelas3Brf2UniPk.narrowPeak			wgEncodeAwgTfbsHaibH1hescNrsfV0416102UniPk.narrowPeak
										GSM2797498	CBX5		wgEncodeAwgTfbsHaibK562Cbx3sc101004V0422111UniPk.narrowPeak			wgEncodeAwgTfbsHaibGm12878Mef2aPcr1xUniPk.narrowPeak			wgEncodeAwgTfbsSydhHelas3Brg1IggmusUniPk.narrowPeak			wgEncodeAwgTfbsHaibH1hescP300V0416102UniPk.narrowPeak
										GSM2797499	CEBPA		wgEncodeAwgTfbsHaibK562Cebpbsc150V0422111UniPk.narrowPeak			wgEncodeAwgTfbsHaibGm12878Mef2csc13268V0416101UniPk.narrowPeak			wgEncodeAwgTfbsSydhHelas3CebpbIggrabUniPk.narrowPeak			wgEncodeAwgTfbsHaibH1hescPol24h8V0416102UniPk.narrowPeak
					ATAC-seq					GSM2797500	CEBPB		wgEncodeAwgTfbsHaibK562E2f6V0416102UniPk.narrowPeak			wgEncodeAwgTfbsHaibGm12878Mta3sc81325V0422111UniPk.narrowPeak			wgEncodeAwgTfbsSydhHelas3CfosUniPk.narrowPeak			wgEncodeAwgTfbsHaibH1hescPol2V0416102UniPk.narrowPeak
					K562	GSM5214503	GSM5214504			GSM2797501	CEBPD		wgEncodeAwgTfbsHaibK562Egr1V0416101UniPk.narrowPeak			wgEncodeAwgTfbsHaibGm12878Nfatc1sc17834V0422111UniPk.narrowPeak			wgEncodeAwgTfbsSydhHelas3Chd2IggrabUniPk.narrowPeak			wgEncodeAwgTfbsHaibH1hescPou5f1sc9081V0416102UniPk.narrowPeak
					GM12878	GSM5214550	GSM5214551			GSM2797502	CEBPG		wgEncodeAwgTfbsHaibK562Elf1sc631V0416102UniPk.narrowPeak			wgEncodeAwgTfbsHaibGm12878Nficsc81335V0422111UniPk.narrowPeak			wgEncodeAwgTfbsSydhHelas3CjunIggrabUniPk.narrowPeak			wgEncodeAwgTfbsHaibH1hescRad21V0416102UniPk.narrowPeak
					HepG2	GSM5214186	GSM5214187			GSM2797503	CEBPZ		wgEncodeAwgTfbsHaibK562Ets1V0416101UniPk.narrowPeak			wgEncodeAwgTfbsHaibGm12878NrsfPcr1xUniPk.narrowPeak			wgEncodeAwgTfbsSydhHelas3CmycUniPk.narrowPeak			wgEncodeAwgTfbsHaibH1hescRxraV0416102UniPk.narrowPeak
					HeLa-S3	GSM4764093				GSM2797504	CHD2		wgEncodeAwgTfbsHaibK562Fosl1sc183V0416101UniPk.narrowPeak			wgEncodeAwgTfbsHaibGm12878P300Pcr1xUniPk.narrowPeak			wgEncodeAwgTfbsSydhHelas3Corestsc30189IggrabUniPk.narrowPeak			wgEncodeAwgTfbsHaibH1hescSin3ak20Pcr1xUniPk.narrowPeak
					H1hesc	GSM2264818				GSM2797505	CIZ1		wgEncodeAwgTfbsHaibK562GabpV0416101UniPk.narrowPeak			wgEncodeAwgTfbsHaibGm12878Pax5c20Pcr1xUniPk.narrowPeak			wgEncodeAwgTfbsSydhHelas3E2f1UniPk.narrowPeak			wgEncodeAwgTfbsHaibH1hescSix5Pcr1xUniPk.narrowPeak
										GSM2797506	CREB1		wgEncodeAwgTfbsHaibK562Gata2sc267Pcr1xUniPk.narrowPeak			wgEncodeAwgTfbsHaibGm12878Pax5n19Pcr1xUniPk.narrowPeak			wgEncodeAwgTfbsSydhHelas3E2f4UniPk.narrowPeak			wgEncodeAwgTfbsHaibH1hescSp1Pcr1xUniPk.narrowPeak
					mouse ESC	GSM2417076				GSM2797507	CREM		wgEncodeAwgTfbsHaibK562Hdac2sc6296V0416102UniPk.narrowPeak			wgEncodeAwgTfbsHaibGm12878Pbx3Pcr1xUniPk.narrowPeak			wgEncodeAwgTfbsSydhHelas3E2f6UniPk.narrowPeak			wgEncodeAwgTfbsHaibH1hescSp2V0422111UniPk.narrowPeak
					MEF	GSM2417068				GSM2797508	CTCF		wgEncodeAwgTfbsHaibK562MaxV0416102UniPk.narrowPeak			wgEncodeAwgTfbsHaibGm12878Pmlsc71910V0422111UniPk.narrowPeak			wgEncodeAwgTfbsSydhHelas3Elk112771IggrabUniPk.narrowPeak			wgEncodeAwgTfbsHaibH1hescSp4v20V0422111UniPk.narrowPeak
										GSM2797509	CUX1		wgEncodeAwgTfbsHaibK562Mef2aV0416101UniPk.narrowPeak			wgEncodeAwgTfbsHaibGm12878Pou2f2Pcr1xUniPk.narrowPeak			wgEncodeAwgTfbsSydhHelas3Elk4UcdUniPk.narrowPeak			wgEncodeAwgTfbsHaibH1hescSrfPcr1xUniPk.narrowPeak
										GSM2797510	DMAP1		wgEncodeAwgTfbsHaibK562Nr2f2sc271940V0422111UniPk.narrowPeak			wgEncodeAwgTfbsHaibGm12878Pu1Pcr1xUniPk.narrowPeak			wgEncodeAwgTfbsSydhHelas3Gtf2f1ab28179IggrabUniPk.narrowPeak			wgEncodeAwgTfbsHaibH1hescTaf1V0416102UniPk.narrowPeak
										GSM2797511	DNMT3B		wgEncodeAwgTfbsHaibK562NrsfV0416102UniPk.narrowPeak			wgEncodeAwgTfbsHaibGm12878Runx3sc101553V0422111UniPk.narrowPeak			wgEncodeAwgTfbsSydhHelas3Hae2f1UniPk.narrowPeak			wgEncodeAwgTfbsHaibH1hescTaf7sc101167V0416102UniPk.narrowPeak
										GSM2797512	DRAP1		wgEncodeAwgTfbsHaibK562Pmlsc71910V0422111UniPk.narrowPeak			wgEncodeAwgTfbsHaibGm12878RxraPcr1xUniPk.narrowPeak			wgEncodeAwgTfbsSydhHelas3Ini1IggmusUniPk.narrowPeak			wgEncodeAwgTfbsHaibH1hescTcf12Pcr1xUniPk.narrowPeak
										GSM2797513	E2F7_iso1		wgEncodeAwgTfbsHaibK562Pol24h8V0416101UniPk.narrowPeak			wgEncodeAwgTfbsHaibGm12878Six5Pcr1xUniPk.narrowPeak			wgEncodeAwgTfbsSydhHelas3Irf3IggrabUniPk.narrowPeak			wgEncodeAwgTfbsHaibH1hescTead4sc101184V0422111UniPk.narrowPeak
										GSM2797514	ELF3		wgEncodeAwgTfbsHaibK562Pol2V0416101UniPk.narrowPeak			wgEncodeAwgTfbsHaibGm12878Sp1Pcr1xUniPk.narrowPeak			wgEncodeAwgTfbsSydhHelas3JundIggrabUniPk.narrowPeak			wgEncodeAwgTfbsHaibH1hescUsf1Pcr1xUniPk.narrowPeak
										GSM2797515	EP300		wgEncodeAwgTfbsHaibK562Pu1Pcr1xUniPk.narrowPeak			wgEncodeAwgTfbsHaibGm12878SrfPcr2xUniPk.narrowPeak			wgEncodeAwgTfbsSydhHelas3MafkIggrabUniPk.narrowPeak			wgEncodeAwgTfbsHaibH1hescYy1sc281V0416102UniPk.narrowPeak
										GSM2797516	ERF		wgEncodeAwgTfbsHaibK562Rad21V0416102UniPk.narrowPeak			wgEncodeAwgTfbsHaibGm12878Stat5asc74442V0422111UniPk.narrowPeak			wgEncodeAwgTfbsSydhHelas3MaxIggrabUniPk.narrowPeak			wgEncodeAwgTfbsSydhH1hescBach1sc14700IggrabUniPk.narrowPeak
										GSM2797517	ESRRA		wgEncodeAwgTfbsHaibK562Sin3ak20V0416101UniPk.narrowPeak			wgEncodeAwgTfbsHaibGm12878Taf1Pcr1xUniPk.narrowPeak			wgEncodeAwgTfbsSydhHelas3Mazab85725IggrabUniPk.narrowPeak			wgEncodeAwgTfbsSydhH1hescBrca1IggrabUniPk.narrowPeak
										GSM2797518	ETV4		wgEncodeAwgTfbsHaibK562Six5Pcr1xUniPk.narrowPeak			wgEncodeAwgTfbsHaibGm12878Tcf12Pcr1xUniPk.narrowPeak			wgEncodeAwgTfbsSydhHelas3Mxi1af4185IggrabUniPk.narrowPeak			wgEncodeAwgTfbsSydhH1hescCebpbIggrabUniPk.narrowPeak
										GSM2797519	EZH2		wgEncodeAwgTfbsHaibK562Sp1Pcr1xUniPk.narrowPeak			wgEncodeAwgTfbsHaibGm12878Tcf3Pcr1xUniPk.narrowPeak			wgEncodeAwgTfbsSydhHelas3NfyaIggrabUniPk.narrowPeak			wgEncodeAwgTfbsSydhH1hescChd1a301218aIggrabUniPk.narrowPeak
										GSM2797520	FOS		wgEncodeAwgTfbsHaibK562Sp2sc643V0416102UniPk.narrowPeak			wgEncodeAwgTfbsHaibGm12878Usf1Pcr2xUniPk.narrowPeak			wgEncodeAwgTfbsSydhHelas3NfybIggrabUniPk.narrowPeak			wgEncodeAwgTfbsSydhH1hescChd2IggrabUniPk.narrowPeak
										GSM2797521	FOSL2		wgEncodeAwgTfbsHaibK562SrfV0416101UniPk.narrowPeak			wgEncodeAwgTfbsHaibGm12878Yy1sc281Pcr1xUniPk.narrowPeak			wgEncodeAwgTfbsSydhHelas3Nrf1IggmusUniPk.narrowPeak			wgEncodeAwgTfbsSydhH1hescCjunIggrabUniPk.narrowPeak
										GSM2797522	FOXA1		wgEncodeAwgTfbsHaibK562Stat5asc74442V0422111UniPk.narrowPeak			wgEncodeAwgTfbsHaibGm12878Zbtb33Pcr1xUniPk.narrowPeak			wgEncodeAwgTfbsSydhHelas3P300sc584sc584IggrabUniPk.narrowPeak			wgEncodeAwgTfbsSydhH1hescCmycIggrabUniPk.narrowPeak
										GSM2797523	FOXA2		wgEncodeAwgTfbsHaibK562Taf1V0416101UniPk.narrowPeak			wgEncodeAwgTfbsHaibGm12878Zeb1sc25388V0416102UniPk.narrowPeak			wgEncodeAwgTfbsSydhHelas3Pol2UniPk.narrowPeak			wgEncodeAwgTfbsSydhH1hescCtbp2UcdUniPk.narrowPeak
										GSM2797524	FOXA3		wgEncodeAwgTfbsHaibK562Taf7sc101167V0416101UniPk.narrowPeak			wgEncodeAwgTfbsSydhGm12878Bhlhe40cIggmusUniPk.narrowPeak			wgEncodeAwgTfbsSydhHelas3Pol2s2IggrabUniPk.narrowPeak			wgEncodeAwgTfbsSydhH1hescGtf2f1IggrabUniPk.narrowPeak
										GSM2797525	FOXK1		wgEncodeAwgTfbsHaibK562Tead4sc101184V0422111UniPk.narrowPeak			wgEncodeAwgTfbsSydhGm12878Brca1a300IggmusUniPk.narrowPeak			wgEncodeAwgTfbsSydhHelas3Prdm19115IggrabUniPk.narrowPeak			wgEncodeAwgTfbsSydhH1hescJundIggrabUniPk.narrowPeak
										GSM2797526	FOXO1		wgEncodeAwgTfbsHaibK562Thap1sc98174V0416101UniPk.narrowPeak			wgEncodeAwgTfbsSydhGm12878CfosUniPk.narrowPeak			wgEncodeAwgTfbsSydhHelas3Rad21IggrabUniPk.narrowPeak			wgEncodeAwgTfbsSydhH1hescMafkIggrabUniPk.narrowPeak
										GSM2797527	FOXP1		wgEncodeAwgTfbsHaibK562Trim28sc81411V0422111UniPk.narrowPeak			wgEncodeAwgTfbsSydhGm12878Chd1a301218aIggmusUniPk.narrowPeak			wgEncodeAwgTfbsSydhHelas3Rfx5200401194IggrabUniPk.narrowPeak			wgEncodeAwgTfbsSydhH1hescMaxUcdUniPk.narrowPeak
										GSM2797528	GABPA		wgEncodeAwgTfbsHaibK562Usf1V0416101UniPk.narrowPeak			wgEncodeAwgTfbsSydhGm12878Chd2ab68301IggmusUniPk.narrowPeak			wgEncodeAwgTfbsSydhHelas3Rpc155UniPk.narrowPeak			wgEncodeAwgTfbsSydhH1hescMxi1IggrabUniPk.narrowPeak
										GSM2797529	GABPB1_v2		wgEncodeAwgTfbsHaibK562Yy1V0416101UniPk.narrowPeak			wgEncodeAwgTfbsSydhGm12878Corestsc30189IggmusUniPk.narrowPeak			wgEncodeAwgTfbsSydhHelas3Smc3ab9263IggrabUniPk.narrowPeak			wgEncodeAwgTfbsSydhH1hescNrf1IggrabUniPk.narrowPeak
										GSM2797530	GATA4		wgEncodeAwgTfbsHaibK562Yy1V0416102UniPk.narrowPeak			wgEncodeAwgTfbsSydhGm12878E2f4IggmusUniPk.narrowPeak			wgEncodeAwgTfbsSydhHelas3Spt20UniPk.narrowPeak			wgEncodeAwgTfbsSydhH1hescRad21IggrabUniPk.narrowPeak
										GSM2797531	GATAD1		wgEncodeAwgTfbsHaibK562Zbtb33Pcr1xUniPk.narrowPeak			wgEncodeAwgTfbsSydhGm12878Ebf1sc137065UniPk.narrowPeak			wgEncodeAwgTfbsSydhHelas3Stat1Ifng30UniPk.narrowPeak			wgEncodeAwgTfbsSydhH1hescRfx5200401194IggrabUniPk.narrowPeak
										GSM2797532	GATAD2A		wgEncodeAwgTfbsHaibK562Zbtb7asc34508V0416101UniPk.narrowPeak			wgEncodeAwgTfbsSydhGm12878Elk112771IggmusUniPk.narrowPeak			wgEncodeAwgTfbsSydhHelas3Stat3IggrabUniPk.narrowPeak			wgEncodeAwgTfbsSydhH1hescSin3anb6001263IggrabUniPk.narrowPeak
										GSM2797533	GMEB2		wgEncodeAwgTfbsSydhK562Arid3asc8821IggrabUniPk.narrowPeak			wgEncodeAwgTfbsSydhGm12878Ikzf1iknuclaUniPk.narrowPeak			wgEncodeAwgTfbsSydhHelas3TbpIggrabUniPk.narrowPeak			wgEncodeAwgTfbsSydhH1hescSuz12UcdUniPk.narrowPeak
										GSM2797534	HBP1		wgEncodeAwgTfbsSydhK562Atf106325UniPk.narrowPeak			wgEncodeAwgTfbsSydhGm12878JundUniPk.narrowPeak			wgEncodeAwgTfbsSydhHelas3Tcf7l2UcdUniPk.narrowPeak			wgEncodeAwgTfbsSydhH1hescTbpIggrabUniPk.narrowPeak
										GSM2797535	HCFC1		wgEncodeAwgTfbsSydhK562Atf3UniPk.narrowPeak			wgEncodeAwgTfbsSydhGm12878MaxIggmusUniPk.narrowPeak			wgEncodeAwgTfbsSydhHelas3Tcf7l2c9b92565UcdUniPk.narrowPeak			wgEncodeAwgTfbsSydhH1hescUsf2IggrabUniPk.narrowPeak
										GSM2797536	HDAC2		wgEncodeAwgTfbsSydhK562Bach1sc14700IggrabUniPk.narrowPeak			wgEncodeAwgTfbsSydhGm12878Mazab85725IggmusUniPk.narrowPeak			wgEncodeAwgTfbsSydhHelas3Tf3c110UniPk.narrowPeak			wgEncodeAwgTfbsSydhH1hescZnf143IggrabUniPk.narrowPeak
										GSM2797537	HHEX		wgEncodeAwgTfbsSydhK562Bdp1UniPk.narrowPeak			wgEncodeAwgTfbsSydhGm12878Mxi1IggmusUniPk.narrowPeak			wgEncodeAwgTfbsSydhHelas3Tr4UniPk.narrowPeak			wgEncodeAwgTfbsUtaH1hescCmycUniPk.narrowPeak
										GSM2797538	HLF		wgEncodeAwgTfbsSydhK562Bhlhe40nb100IggrabUniPk.narrowPeak			wgEncodeAwgTfbsSydhGm12878Nfe2sc22827UniPk.narrowPeak			wgEncodeAwgTfbsSydhHelas3Usf2IggmusUniPk.narrowPeak			wgEncodeAwgTfbsUtaH1hescPol2UniPk.narrowPeak
										GSM2797539	HMG20A		wgEncodeAwgTfbsSydhK562Brf1UniPk.narrowPeak			wgEncodeAwgTfbsSydhGm12878NfkbTnfaIggrabUniPk.narrowPeak			wgEncodeAwgTfbsSydhHelas3Zkscan1hpa006672IggrabUniPk.narrowPeak
										GSM2797540	HMG20B_v2		wgEncodeAwgTfbsSydhK562Brf2UniPk.narrowPeak			wgEncodeAwgTfbsSydhGm12878NfyaIggmusUniPk.narrowPeak			wgEncodeAwgTfbsSydhHelas3Znf143IggrabUniPk.narrowPeak
										GSM2797541	HMGXB3		wgEncodeAwgTfbsSydhK562Brg1IggmusUniPk.narrowPeak			wgEncodeAwgTfbsSydhGm12878NfybIggmusUniPk.narrowPeak			wgEncodeAwgTfbsSydhHelas3Znf274UcdUniPk.narrowPeak
										GSM2797542	HMGXB4		wgEncodeAwgTfbsSydhK562Ccnt2UniPk.narrowPeak			wgEncodeAwgTfbsSydhGm12878Nrf1IggmusUniPk.narrowPeak			wgEncodeAwgTfbsSydhHelas3Zzz3UniPk.narrowPeak
										GSM2797543	HNF1A		wgEncodeAwgTfbsSydhK562CebpbIggrabUniPk.narrowPeak			wgEncodeAwgTfbsSydhGm12878P300IggmusUniPk.narrowPeak			wgEncodeAwgTfbsUtaHelas3CmycUniPk.narrowPeak
										GSM2797544	HNF4A		wgEncodeAwgTfbsSydhK562CfosUniPk.narrowPeak			wgEncodeAwgTfbsSydhGm12878P300bUniPk.narrowPeak			wgEncodeAwgTfbsUtaHelas3Pol2UniPk.narrowPeak
										GSM2797545	HNF4G		wgEncodeAwgTfbsSydhK562Chd2ab68301IggrabUniPk.narrowPeak			wgEncodeAwgTfbsSydhGm12878Rfx5200401194IggmusUniPk.narrowPeak
										GSM2797546	HOMEZ		wgEncodeAwgTfbsSydhK562CjunIfna30UniPk.narrowPeak			wgEncodeAwgTfbsSydhGm12878Sin3anb6001263IggmusUniPk.narrowPeak
										GSM2797547	HSF1		wgEncodeAwgTfbsSydhK562CjunIfna6hUniPk.narrowPeak			wgEncodeAwgTfbsSydhGm12878Stat1UniPk.narrowPeak
										GSM2797548	IRF3		wgEncodeAwgTfbsSydhK562CjunIfng30UniPk.narrowPeak			wgEncodeAwgTfbsSydhGm12878Stat3IggmusUniPk.narrowPeak
										GSM2797549	JARID2_iso1		wgEncodeAwgTfbsSydhK562CjunIfng6hUniPk.narrowPeak			wgEncodeAwgTfbsSydhGm12878Tblr1ab24550IggmusUniPk.narrowPeak
										GSM2797550	JUND		wgEncodeAwgTfbsSydhK562CjunUniPk.narrowPeak			wgEncodeAwgTfbsSydhGm12878TbpIggmusUniPk.narrowPeak
										GSM2797551	JUN		wgEncodeAwgTfbsSydhK562CmycIfna30UniPk.narrowPeak			wgEncodeAwgTfbsSydhGm12878Tr4UniPk.narrowPeak
										GSM2797552	KAT2B		wgEncodeAwgTfbsSydhK562CmycIfna6hUniPk.narrowPeak			wgEncodeAwgTfbsSydhGm12878Usf2IggmusUniPk.narrowPeak
										GSM2797553	KAT7		wgEncodeAwgTfbsSydhK562CmycIfng30UniPk.narrowPeak			wgEncodeAwgTfbsSydhGm12878WhipIggmusUniPk.narrowPeak
										GSM2797554	KAT8		wgEncodeAwgTfbsSydhK562CmycIfng6hUniPk.narrowPeak			wgEncodeAwgTfbsSydhGm12878Yy1UniPk.narrowPeak
										GSM2797555	KDM1A		wgEncodeAwgTfbsSydhK562CmycIggrabUniPk.narrowPeak			wgEncodeAwgTfbsSydhGm12878Znf143166181apUniPk.narrowPeak
										GSM2797556	KDM2A		wgEncodeAwgTfbsSydhK562CmycUniPk.narrowPeak			wgEncodeAwgTfbsSydhGm12878Znf274UniPk.narrowPeak
										GSM2797557	KDM3A		wgEncodeAwgTfbsSydhK562Corestab24166IggrabUniPk.narrowPeak			wgEncodeAwgTfbsSydhGm12878Zzz3UniPk.narrowPeak
										GSM2797558	KDM6A		wgEncodeAwgTfbsSydhK562Corestsc30189IggrabUniPk.narrowPeak			wgEncodeAwgTfbsUtaGm12878CmycUniPk.narrowPeak
										GSM2797559	KLF10		wgEncodeAwgTfbsSydhK562E2f4UcdUniPk.narrowPeak
										GSM2797560	KLF11		wgEncodeAwgTfbsSydhK562E2f6UcdUniPk.narrowPeak
										GSM2797561	KLF16		wgEncodeAwgTfbsSydhK562Elk112771IggrabUniPk.narrowPeak
										GSM2797562	KLF6_v2		wgEncodeAwgTfbsSydhK562Gata1UcdUniPk.narrowPeak
										GSM2797563	KLF9		wgEncodeAwgTfbsSydhK562Gata2UcdUniPk.narrowPeak
										GSM2797564	KMT2B		wgEncodeAwgTfbsSydhK562Gtf2bUniPk.narrowPeak
										GSM2797565	MAFF		wgEncodeAwgTfbsSydhK562Gtf2f1ab28179IggrabUniPk.narrowPeak
										GSM2797566	MAFK		wgEncodeAwgTfbsSydhK562Hmgn3UniPk.narrowPeak
										GSM2797567	MAX		wgEncodeAwgTfbsSydhK562Ini1IggmusUniPk.narrowPeak
										GSM2797568	MAZ		wgEncodeAwgTfbsSydhK562Irf1Ifna30UniPk.narrowPeak
										GSM2797569	MBD1_v1		wgEncodeAwgTfbsSydhK562Irf1Ifna6hUniPk.narrowPeak
										GSM2797570	MBD1_v2		wgEncodeAwgTfbsSydhK562Irf1Ifng30UniPk.narrowPeak
										GSM2797571	MBD4		wgEncodeAwgTfbsSydhK562Irf1Ifng6hUniPk.narrowPeak
										GSM2797572	MIER2		wgEncodeAwgTfbsSydhK562JundIggrabUniPk.narrowPeak
										GSM2797573	MIER3		wgEncodeAwgTfbsSydhK562Kap1UcdUniPk.narrowPeak
										GSM2797574	MIXL1		wgEncodeAwgTfbsSydhK562MaffIggrabUniPk.narrowPeak
										GSM2797575	MLX		wgEncodeAwgTfbsSydhK562Mafkab50322IggrabUniPk.narrowPeak
										GSM2797576	MTA1		wgEncodeAwgTfbsSydhK562MaxIggrabUniPk.narrowPeak
										GSM2797577	MXD3_v1		wgEncodeAwgTfbsSydhK562Mazab85725IggrabUniPk.narrowPeak
										GSM2797578	MXD4		wgEncodeAwgTfbsSydhK562Mxi1af4185IggrabUniPk.narrowPeak
										GSM2797579	MXI1		wgEncodeAwgTfbsSydhK562NelfeUniPk.narrowPeak
										GSM2797580	MYBL2		wgEncodeAwgTfbsSydhK562Nfe2UniPk.narrowPeak
										GSM2797581	MYC		wgEncodeAwgTfbsSydhK562NfyaUniPk.narrowPeak
										GSM2797582	NCoA2		wgEncodeAwgTfbsSydhK562NfybUniPk.narrowPeak
										GSM2797583	NFE2L2		wgEncodeAwgTfbsSydhK562Nrf1IggrabUniPk.narrowPeak
										GSM2797584	NFIA_v1		wgEncodeAwgTfbsSydhK562P300IggrabUniPk.narrowPeak
										GSM2797585	NFIC		wgEncodeAwgTfbsSydhK562Pol2Ifna30UniPk.narrowPeak
										GSM2797586	NFIL3		wgEncodeAwgTfbsSydhK562Pol2Ifna6hUniPk.narrowPeak
										GSM2797587	NFYC		wgEncodeAwgTfbsSydhK562Pol2Ifng30UniPk.narrowPeak
										GSM2797588	NPAS2_iso2		wgEncodeAwgTfbsSydhK562Pol2Ifng6hUniPk.narrowPeak
										GSM2797589	NR1H2		wgEncodeAwgTfbsSydhK562Pol2IggmusUniPk.narrowPeak
										GSM2797590	NR2C2		wgEncodeAwgTfbsSydhK562Pol2UniPk.narrowPeak
										GSM2797591	NR2F1		wgEncodeAwgTfbsSydhK562Pol2s2IggrabUniPk.narrowPeak
										GSM2797592	NR2F2		wgEncodeAwgTfbsSydhK562Pol2s2UniPk.narrowPeak
										GSM2797593	NR2F6		wgEncodeAwgTfbsSydhK562Pol3UniPk.narrowPeak
										GSM2797594	NR3C1		wgEncodeAwgTfbsSydhK562Rad21UniPk.narrowPeak
										GSM2797595	NRF1		wgEncodeAwgTfbsSydhK562Rfx5IggrabUniPk.narrowPeak
										GSM2797596	PAF1_v1		wgEncodeAwgTfbsSydhK562Rpc155UniPk.narrowPeak
										GSM2797597	PAXIP1_iso1		wgEncodeAwgTfbsSydhK562Setdb1MnasedUcdUniPk.narrowPeak
										GSM2797598	PBX2		wgEncodeAwgTfbsSydhK562Setdb1UcdUniPk.narrowPeak
										GSM2797599	POLR2A		wgEncodeAwgTfbsSydhK562Sirt6UniPk.narrowPeak
										GSM2797600	POLR2AphosphoS2		wgEncodeAwgTfbsSydhK562Smc3ab9263IggrabUniPk.narrowPeak
										GSM2797601	POLR2AphosphoS5		wgEncodeAwgTfbsSydhK562Stat1Ifna30UniPk.narrowPeak
										GSM2797602	PPARG_v1		wgEncodeAwgTfbsSydhK562Stat1Ifna6hUniPk.narrowPeak
										GSM2797603	PRDM10		wgEncodeAwgTfbsSydhK562Stat1Ifng30UniPk.narrowPeak
										GSM2797604	PROX1		wgEncodeAwgTfbsSydhK562Stat1Ifng6hUniPk.narrowPeak
										GSM2797605	RAD21		wgEncodeAwgTfbsSydhK562Stat2Ifna30UniPk.narrowPeak
										GSM2797606	RARA		wgEncodeAwgTfbsSydhK562Stat2Ifna6hUniPk.narrowPeak
										GSM2797607	RCOR1		wgEncodeAwgTfbsSydhK562Tal1sc12984IggmusUniPk.narrowPeak
										GSM2797608	RCOR2		wgEncodeAwgTfbsSydhK562Tblr1ab24550IggrabUniPk.narrowPeak
										GSM2797609	RERE		wgEncodeAwgTfbsSydhK562Tblr1nb600270IggrabUniPk.narrowPeak
										GSM2797610	REST		wgEncodeAwgTfbsSydhK562TbpIggmusUniPk.narrowPeak
										GSM2797611	RFX3_iso1		wgEncodeAwgTfbsSydhK562Tf3c110UniPk.narrowPeak
										GSM2797612	RFX5		wgEncodeAwgTfbsSydhK562Tr4UcdUniPk.narrowPeak
										GSM2797613	RFXANK		wgEncodeAwgTfbsSydhK562Ubfsc13125IggmusUniPk.narrowPeak
										GSM2797614	RING1		wgEncodeAwgTfbsSydhK562Ubtfsab1404509IggmusUniPk.narrowPeak
										GSM2797615	RREB1_iso2		wgEncodeAwgTfbsSydhK562Usf2IggrabUniPk.narrowPeak
										GSM2797616	RUVBL1		wgEncodeAwgTfbsSydhK562Yy1UcdUniPk.narrowPeak
										GSM2797617	RXRA		wgEncodeAwgTfbsSydhK562Znf143IggrabUniPk.narrowPeak
										GSM2797618	RXRB		wgEncodeAwgTfbsSydhK562Znf263UcdUniPk.narrowPeak
										GSM2797619	SAP130		wgEncodeAwgTfbsSydhK562Znf274UcdUniPk.narrowPeak
										GSM2797620	SIN3A		wgEncodeAwgTfbsSydhK562Znf274m01UcdUniPk.narrowPeak
										GSM2797621	SIN3B		wgEncodeAwgTfbsUchicagoK562EfosUniPk.narrowPeak
										GSM2797622	SIX4_iso1		wgEncodeAwgTfbsUchicagoK562Egata2UniPk.narrowPeak
										GSM2797623	SLC30A9		wgEncodeAwgTfbsUchicagoK562Ehdac8UniPk.narrowPeak
										GSM2797624	SMAD4_iso1		wgEncodeAwgTfbsUchicagoK562EjunbUniPk.narrowPeak
										GSM2797625	SMC3		wgEncodeAwgTfbsUchicagoK562EjundUniPk.narrowPeak
										GSM2797626	SOX13		wgEncodeAwgTfbsUtaK562CmycUniPk.narrowPeak
										GSM2797627	SOX13_iso1		wgEncodeAwgTfbsUtaK562Pol2UniPk.narrowPeak
										GSM2797628	SOX5
										GSM2797629	SP1
										GSM2797630	SP2
										GSM2797631	SP5
										GSM2797632	SREBF1
										GSM2797633	SRF
										GSM2797634	SSRP1
										GSM2797635	SUZ12
										GSM2797636	TAF1
										GSM2797637	TBL1XR1
										GSM2797638	TBP
										GSM2797639	TCF12
										GSM2797640	TCF25
										GSM2797641	TCF7
										GSM2797642	TCF7L2
										GSM2797643	TEAD1
										GSM2797644	TEAD3
										GSM2797645	TEAD4
										GSM2797646	TFAP4
										GSM2797647	TFDP1
										GSM2797648	TFE3
										GSM2797649	TGIF2
										GSM2797650	THAP11
										GSM2797651	THRA_iso1
										GSM2797652	THRB
										GSM2797653	UBP1
										GSM2797654	USF1
										GSM2797655	USF2
										GSM2797656	YY1
										GSM2797657	ZBTB21
										GSM2797658	ZBTB26
										GSM2797659	ZBTB33
										GSM2797660	ZBTB7A
										GSM2797661	ZC3H4
										GSM2797662	ZCCHC11
										GSM2797663	ZEB1
										GSM2797664	ZFP1_v1
										GSM2797665	ZFP64
										GSM2797666	ZGPAT
										GSM2797667	ZHX2
										GSM2797668	ZHX3_iso1
										GSM2797669	ZKSCAN8
										GSM2797670	ZMYM3
										GSM2797671	ZNF12
										GSM2797672	ZNF143
										GSM2797673	ZNF189
										GSM2797674	ZNF219
										GSM2797675	ZNF274
										GSM2797676	ZNF281
										GSM2797677	ZNF331
										GSM2797678	ZNF334_iso1
										GSM2797679	ZNF335
										GSM2797680	ZNF384
										GSM2797681	ZNF3
										GSM2797682	ZNF48
										GSM2797683	ZNF511
										GSM2797684	ZNF544_iso1
										GSM2797685	ZNF580
										GSM2797686	ZNF644
										GSM2797687	ZNF652
										GSM2797688	ZNF792
										GSM2797689	ZNF7_iso2
										GSM2797690	ZSCAN29_iso1
										GSM2797691	ZSCAN9

## Sheet: Table S2
Commonly expressed genes among the 5 human cell lines												The top 30 most enriched GO terms in Biological Process for the commonly expressed genes
		Expression in rpkm										Term	FDR
geneID	symbol	GM12878	H1hesc	Helas3	hepG2	K562						GO:0000398~mRNA splicing, via spliceosome	1.23604e-59
GeneID:100288069	NA	7.5583	7.3872	4.4739	12.5576	12.1852						GO:0006412~translation	2.53113e-50
GeneID:643837	NA	9.7631	3.4575	7.3377	10.9647	12.2017						GO:0006364~rRNA processing	6.02635e-44
GeneID:26155	NOC2L	28.0411	43.2918	33.628	24.4429	84.746						GO:0008380~RNA splicing	7.12792e-40
GeneID:339451	KLHL17	10.1175	12.1183	5.4697	8.349	14.5344						GO:0051301~cell division	1.20456e-37
GeneID:375790	AGRN	23.2057	55.1368	62.5209	70.5582	34.8105						GO:0032543~mitochondrial translation	1.91547e-37
GeneID:51150	SDF4	44.4422	38.6524	42.9841	76.6188	80.9188						GO:0002181~cytoplasmic translation	6.80428e-36
GeneID:126792	B3GALT6	5.8268	8.1984	12.646	9.748	11.3293						GO:0006397~mRNA processing	5.63189e-35
GeneID:118424	UBE2J2	21.7986	19.3264	15.1863	15.8057	32.584						GO:0006281~DNA repair	1.59154e-33
GeneID:116983	ACAP3	11.9725	11.1938	12.3433	21.0835	16.4245						GO:0006338~chromatin remodeling	3.07241e-30
GeneID:54973	CPSF3L	41.6039	57.3907	31.9082	40.2945	73.139						GO:0042274~ribosomal small subunit biogenesis	2.71555e-27
GeneID:80772	GLTPD1	9.5546	5.2021	9.1825	8.4444	10.7297						GO:0006325~chromatin organization	6.19588e-25
GeneID:1855	DVL1	12.3536	24.8327	34.5812	29.5359	39.0633						GO:0043161~proteasome-mediated ubiquitin-dependent protein catabolic process	1.37465e-23
GeneID:54998	AURKAIP1	48.9101	64.8414	32.9329	35.0604	88.7892						GO:0006511~ubiquitin-dependent protein catabolic process	2.1214e-23
GeneID:81669	CCNL2	26.3109	29.244	45.7539	84.7521	49.1861						GO:0016567~protein ubiquitination	2.01465e-20
GeneID:148413	NA	16.3847	19.1855	14.1466	24.4274	35.9756						GO:0015031~protein transport	9.47338e-20
GeneID:55052	MRPL20	112.412	106.269	58.4803	53.0502	143.821						GO:0006974~cellular response to DNA damage stimulus	1.51484e-19
GeneID:219293	ATAD3C	1.5326	2.9164	2.0006	2.2495	2.6349						GO:0007049~cell cycle	2.55565e-17
GeneID:83858	ATAD3B	11.3604	21.5826	12.3994	9.142	23.7835						GO:0006413~translational initiation	3.72289e-17
GeneID:55210	ATAD3A	20.3505	39.2597	19.6928	14.6142	52.9341						GO:0006282~regulation of DNA repair	8.9963e-17
GeneID:29101	SSU72	57.0265	82.2623	55.4509	65.4462	106.294						GO:0006457~protein folding	1.7866e-15
GeneID:142678	MIB2	11.1104	9.3039	10.0184	14.4097	9.7813						GO:0006351~transcription, DNA-templated	1.82351e-14
GeneID:984	CDK11B	19.1263	21.2307	19.8143	12.9302	23.286						GO:0060261~positive regulation of transcription initiation from RNA polymerase II promoter	3.2372e-14
GeneID:728661	SLC35E2B	26.1693	14.0557	18.752	16.284	32.4163						GO:0006886~intracellular protein transport	9.4967e-14
GeneID:728642	CDK11A	30.9666	36.3939	26.3791	21.4452	40.9518						GO:0050821~protein stabilization	1.99106e-13
GeneID:9906	SLC35E2	14.5078	14.1215	10.704	7.2267	15.1807						GO:0000209~protein polyubiquitination	2.08588e-13
GeneID:65220	NADK	21.7063	25.1788	19.3182	25.5884	30.6057						GO:0006913~nucleocytoplasmic transport	5.73629e-13
GeneID:2782	GNB1	147.249	142.473	81.4619	128.092	129.452						GO:0000387~spliceosomal snRNP assembly	2.50568e-12
GeneID:199990	C1orf86	7.7789	16.7162	5.0948	13.5644	18.3884						GO:0032981~mitochondrial respiratory chain complex I assembly	3.38895e-12
GeneID:11079	RER1	32.611	26.8795	33.5458	29.427	52.7888
GeneID:5192	PEX10	13.0877	16.4917	16.3803	13.8935	12.6309
GeneID:55229	PANK4	9.1529	9.181	7.1538	7.9207	13.3352
GeneID:127262	TPRG1L	14.3846	13.8244	11.7835	32.8078	9.7541
GeneID:49856	WRAP73	14.4529	14.0195	8.9596	9.4316	14.3124
GeneID:57212	NA	6.6236	11.781	6.9415	5.5155	10.5219
GeneID:57470	LRRC47	21.6078	37.1603	15.4289	19.4421	30.9072
GeneID:9731	CEP104	6.4384	3.7792	6.0051	6.2479	8.3093
GeneID:1677	DFFB	3.0636	3.2676	2.1148	1.8604	3.9073
GeneID:339448	C1orf174	18.8601	15.7375	16.69	12.7121	25.5632
GeneID:261734	NPHP4	2.9101	4.0059	5.0619	3.6557	7.6808
GeneID:6146	RPL22	340.775	127.666	276.678	240.022	253.368
GeneID:23463	ICMT	13.4173	40.5111	26.6449	18.9411	24.0346
GeneID:79707	NOL9	4.6906	4.8286	4.6397	2.83	7.2322
GeneID:3104	ZBTB48	8.4151	8.7591	5.9758	5.2354	15.4612
GeneID:9903	KLHL21	9.0079	9.6605	14.4253	18.3376	21.0904
GeneID:148479	PHF13	14.3066	20.3699	8.5862	15.1173	14.6081
GeneID:90326	THAP3	11.4231	18.1539	11.3257	11.677	20.173
GeneID:55735	DNAJC11	19.4541	41.1727	23.2976	24.4969	40.7065
GeneID:23261	CAMTA1	2.6807	3.9818	2.3196	4.3057	2.9806
GeneID:11315	PARK7	200.066	181.951	130.501	146.865	223.071
GeneID:473	RERE	16.3046	23.8978	7.815	24.6303	11.2345
GeneID:2023	ENO1	1088.17	704.668	1161.7	1082.27	810.562
GeneID:9563	H6PD	8.0207	2.8649	6.2631	11.1096	2.9436
GeneID:199953	TMEM201	4.5346	6.976	5.0305	3.4503	8.455
GeneID:22883	CLSTN1	34.5903	48.1665	39.2985	50.2231	19.0501
GeneID:10277	UBE4B	11.9807	31.2891	11.47	19.3432	23.799
GeneID:5226	PGD	74.3019	182.431	64.6884	77.26	215.802
GeneID:378708	NA	4.5496	4.8456	9.7474	2.962	9.8119
GeneID:100526739	NA	2.6371	4.0116	6.1993	2.0832	6.3144
GeneID:378708	NA	4.5496	4.8456	9.7474	2.962	9.8119
GeneID:100526739	NA	2.6371	4.0116	6.1993	2.0832	6.3144
GeneID:1676	DFFA	12.2078	22.8345	14.851	7.6328	16.0174
GeneID:5195	PEX14	14.6345	15.9661	9.4305	12.2091	24.9343
GeneID:23435	TARDBP	54.1265	62.5143	57.4178	53.4237	70.8762
GeneID:10747	MASP2	4.4254	1.6695	2.1422	4.3435	1.2153
GeneID:6723	SRM	93.525	123.192	60.6212	58.4135	159.713
GeneID:5394	EXOSC10	26.0345	33.4656	36.9728	25.3355	40.0827
GeneID:2475	MTOR	8.1271	25.8174	10.4931	16.409	24.0531
GeneID:29914	UBIAD1	8.451	9.0955	9.096	16.2712	11.2774
GeneID:93611	FBXO44	10.0142	11.8079	5.7516	9.5703	6.1797
GeneID:1185	CLCN6	9.5586	10.0448	4.5447	17.4573	8.3612
GeneID:9927	MFN2	24.8904	28.9717	22.9104	36.7131	56.6491
GeneID:55187	VPS13D	2.6085	3.9889	4.7928	3.0586	7.5682
GeneID:343069	HNRNPCL1	21.9555	33.1584	14.3448	15.2959	18.0246
GeneID:842	CASP9	5.2387	9.2653	7.802	4.3978	17.5088
GeneID:23341	DNAJC16	3.3209	4.219	3.4828	8.0285	3.6281
GeneID:84301	DDI2	6.9861	7.7826	11.0368	16.9314	11.7956
GeneID:6248	RSC1A1	9.3634	8.7696	15.0017	22.6069	14.7428
GeneID:23207	PLEKHM2	26.0217	23.9563	17.5892	15.003	32.4191
GeneID:440567	UQCRHL	252.431	293.656	197.436	239.003	607.507
GeneID:729614	NA	2.1117	1.7734	3.239	3.4713	5.3784
GeneID:23013	SPEN	16.3978	11.7093	12.9953	13.5126	23.2451
GeneID:7709	ZBTB17	14.1811	7.966	6.6062	4.8223	15.8999
GeneID:54455	FBXO42	12.5865	7.3938	6.6063	8.2921	16.2209
GeneID:26099	C1orf144	81.7953	38.9775	42.0095	29.589	60.1179
GeneID:55707	NECAP2	50.0477	14.848	17.5228	22.7072	42.1888
GeneID:84809	NA	13.3216	10.0402	8.6027	30.8633	27.9765
GeneID:6390	SDHB	58.687	37.6521	49.7105	39.7594	130.094
GeneID:23352	UBR4	20.623	28.9881	23.7311	39.9279	41.4988
GeneID:23065	KIAA0090	14.101	16.8386	22.3741	34.9904	26.6815
GeneID:51154	MRTO4	19.7969	26.1219	24.4895	19.0436	48.3448
GeneID:100506730	NA	1.2051	1.2998	3.272	1.4422	1.998
GeneID:8574	AKR7A2	27.7226	17.8803	27.0824	23.6462	45.6255
GeneID:54896	PQLC2	4.5335	7.1998	5.1867	6.4868	13.2969
GeneID:832	NA	104.16	94.7615	27.1178	49.5256	70.3101
GeneID:23252	OTUD3	4.8513	4.7654	5.1833	3.3144	4.2738
GeneID:79594	MUL1	13.2202	10.9387	10.5681	16.5695	18.076
GeneID:8672	EIF4G3	11.8317	16.5869	13.0225	13.1578	12.9811
GeneID:1889	ECE1	7.7603	13.7741	28.7607	15.617	17.5728
GeneID:84224	NBPF3	1.7751	2.3794	1.0617	1.8066	2.2514
GeneID:29092	NA	8.9107	12.2606	11.1264	10.1796	11.8089
GeneID:9923	ZBTB40	6.2829	5.2672	6.7731	8.9802	11.1657
GeneID:23028	KDM1A	41.3981	118.712	37.8398	49.1615	66.1393
GeneID:7798	LUZP1	4.8257	13.2361	7.796	7.4504	6.1322
GeneID:10236	HNRNPR	78.1536	78.7121	81.2106	63.4512	106.252
GeneID:6135	RPL11	3235.26	1498.04	2183.45	1946.32	1607.21
GeneID:6924	TCEB3	19.4527	16.0459	12.9577	14.3733	19.3402
GeneID:100506963	NA	10.9763	10.6806	11.6176	14.3261	12.296
GeneID:57095	PITHD1	34.7382	33.8253	27.2965	19.0851	60.7368
GeneID:11313	LYPLA2	29.006	61.3388	15.793	30.0926	34.3877
GeneID:2582	GALE	14.2243	12.6226	33.6952	30.4865	46.1956
GeneID:3155	HMGCL	31.5053	9.8597	16.0747	30.4935	19.5493
GeneID:55629	PNRC2	84.7608	27.6635	56.693	48.5625	89.5865
GeneID:10772	SRSF10	40.5369	21.9751	28.8139	26.1647	36.0508
GeneID:57185	NIPAL3	5.8348	3.08	8.2458	4.5693	8.2404
GeneID:10250	SRRM1	34.3326	38.4199	49.1145	31.7102	29.5188
GeneID:25932	CLIC4	33.0941	46.5967	42.6219	42.9136	39.3593
GeneID:25949	SYF2	41.5897	11.1195	25.5982	19.9539	26.5207
GeneID:23585	TMEM50A	38.8814	33.9668	28.4392	42.0282	71.6457
GeneID:55219	TMEM57	9.4326	4.8494	4.6632	13.2985	10.7225
GeneID:26119	LDLRAP1	6.7521	7.817	8.5041	7.4121	17.9471
GeneID:56181	FAM54B	21.5018	10.4734	15.127	23.7061	31.7782
GeneID:56181	FAM54B	21.5018	10.4734	15.127	23.7061	31.7782
GeneID:164091	PAQR7	9.0281	5.556	9.9016	15.7218	4.6527
GeneID:5051	PAFAH2	2.7242	3.6135	2.1903	3.6067	3.6683
GeneID:51042	ZNF593	29.9011	22.7926	18.2246	26.4826	54.3163
GeneID:79947	DHDDS	10.8302	13.5673	5.9426	6.1203	11.5791
GeneID:55650	PIGV	7.8126	4.6419	7.2556	8.7972	6.5365
GeneID:84243	ZDHHC18	30.2478	15.6575	8.3072	13.0879	15.0074
GeneID:54707	GPN2	21.7118	15.0909	7.408	11.8452	22.4495
GeneID:63906	GPATCH3	6.9487	8.0781	6.6508	6.4367	10.0848
GeneID:10726	NUDC	43.3437	87.7526	48.1422	62.6973	111.276
GeneID:6548	SLC9A1	8.2628	11.3243	7.239	4.059	6.8673
GeneID:23038	WDTC1	21.209	10.3612	10.828	9.8547	22.3943
GeneID:84065	TMEM222	20.7425	16.0586	13.2245	15.589	26.825
GeneID:10163	WASF2	62.4112	26.4334	56.3301	26.8043	62.1043
GeneID:27245	AHDC1	3.2297	8.1476	5.4752	3.4379	7.0035
GeneID:5511	PPP1R8	18.4625	13.9284	15.8186	15.1013	24.1801
GeneID:2140	EYA3	8.4385	6.1953	4.4276	5.2423	10.7751
GeneID:653566	NA	74.7737	25.1825	57.1162	58.7497	61.2195
GeneID:22826	DNAJC8	46.305	50.7	34.2874	35.9698	69.5924
GeneID:93974	ATPIF1	156.899	78.3555	74.4007	56.6709	166.246
GeneID:54797	MED18	12.4316	7.5456	7.5445	7.8946	16.0644
GeneID:65979	PHACTR4	6.6375	11.6504	8.6971	10.4825	9.334
GeneID:8420	NA	35.6527	55.1281	63.8295	34.834	94.1357
GeneID:1104	RCC1	27.7617	49.9436	42.5096	42.9124	62.4176
GeneID:1104	RCC1	27.7617	49.9436	42.5096	42.9124	62.4176
GeneID:54952	TRNAU1AP	11.2387	13.912	12.9035	6.4293	16.1625
GeneID:85028	NA	27.2999	13.7364	42.3679	24.2144	25.0519
GeneID:6883	TAF12	12.2177	12.411	19.2773	7.1467	25.1289
GeneID:51441	YTHDF2	37.73	46.756	27.3481	30.0023	41.3275
GeneID:6429	SRSF4	68.6293	45.1669	44.0998	40.7131	54.3439
GeneID:51102	MECR	7.4125	9.4865	4.8945	5.4553	12.0189
GeneID:9698	PUM1	20.2828	36.1604	24.7664	51.2395	30.3151
GeneID:9410	SNRNP40	26.6184	47.6577	24.2315	18.7255	49.8458
GeneID:51538	ZCCHC17	21.7412	34.6057	23.6714	11.4611	34.4162
GeneID:553115	NA	27.2484	17.4026	13.0691	19.9023	29.8366
GeneID:10657	KHDRBS1	117.863	115.502	97.9219	75.9145	131.103
GeneID:55116	TMEM39B	15.0945	13.0122	12.5397	7.0026	15.1924
GeneID:23633	KPNA6	13.1438	20.195	14.3376	12.296	11.1174
GeneID:200081	TXLNA	29.0449	19.4652	23.7728	20.3756	26.0044
GeneID:56063	TMEM234	5.6799	3.7681	5.4959	2.7587	10.3645
GeneID:8668	EIF3I	140.585	133.739	94.9402	110.978	240.237
GeneID:3065	HDAC1	111.639	71.194	51.2622	81.7021	130.957
GeneID:55108	BSDC1	18.3148	17.2406	20.5092	34.0021	38.32
GeneID:5928	RBBP4	29.3155	22.794	29.1184	18.5837	36.0181
GeneID:81493	SYNC	29.1465	10.5639	24.7655	17.5059	34.2777
GeneID:8565	YARS	63.0666	80.9457	53.5356	72.1928	157.907
GeneID:64766	S100PBP	13.3952	11.5035	11.3034	6.0011	8.2359
GeneID:127544	RNF19B	18.2334	6.8274	12.4301	12.1899	9.9032
GeneID:113444	C1orf212	7.4517	6.4005	5.9287	5.0313	10.3568
GeneID:100506144	ZMYM6NB	17.7609	11.1306	15.4043	10.9469	19.4115
GeneID:9204	ZMYM6	8.0584	2.1918	2.8428	3.3977	6.2
GeneID:6421	SFPQ	115.306	120.82	89.9566	67.6689	140.253
GeneID:9202	ZMYM4	8.5798	13.5306	7.1746	9.5344	17.9126
GeneID:79932	KIAA0319L	17.6782	21.6582	16.4547	28.0283	19.7157
GeneID:23154	NCDN	12.1286	18.0313	7.4833	4.9421	15.1814
GeneID:5690	PSMB2	33.2824	30.7335	22.0676	24.4919	63.7947
GeneID:192670	EIF2C4	3.4502	3.314	3.4294	6.2516	4.5636
GeneID:26523	EIF2C1	10.3073	11.8638	3.9568	7.3696	11.8282
GeneID:192669	EIF2C3	4.588	3.1783	2.2976	3.3333	4.5685
GeneID:54936	ADPRHL2	29.7629	17.163	16.4071	16.6377	17.2188
GeneID:27095	TRAPPC3	33.3558	29.4578	31.5057	32.5781	64.4002
GeneID:55700	MAP7D1	24.2889	25.6928	10.7054	6.4817	25.3872
GeneID:9967	THRAP3	54.0665	56.9316	34.2153	37.7453	40.8682
GeneID:55194	FAM176B	11.152	8.5432	7.1285	5.9502	16.6398
GeneID:64960	MRPS15	51.17	60.6215	40.3089	45.0655	69.2191
GeneID:64769	MEAF6	18.6234	8.2713	16.4333	15.7986	28.8245
GeneID:79753	SNIP1	9.4738	5.0515	8.085	6.6151	6.8801
GeneID:29889	GNL2	29.8223	39.5994	29.9829	24.816	56.0789
GeneID:54955	C1orf109	5.9399	10.2461	8.4678	8.1007	11.7658
GeneID:79693	YRDC	15.7492	12.8733	17.5852	17.0582	25.3167
GeneID:127687	C1orf122	8.5282	13.6098	6.9643	9.3906	15.4981
GeneID:4520	MTF1	4.3509	2.4587	3.1141	1.8154	1.982
GeneID:3633	INPP5B	14.7953	7.2375	5.1524	4.2134	8.1815
GeneID:10946	SF3A3	27.6052	44.3115	35.1516	25.278	63.2471
GeneID:51118	UTP11L	13.0686	12.5511	17.1243	11.3785	40.5953
GeneID:64121	RRAGC	14.6369	6.8272	12.8359	7.9136	14.2162
GeneID:26292	MYCBP	14.4078	7.6702	10.8939	6.986	22.1734
GeneID:100527950	NA	5.4754	2.8645	4.1913	2.8518	8.4384
GeneID:4725	NDUFS5	214.742	391.309	167.678	154.946	359.5
GeneID:23499	MACF1	16.6746	19.328	9.3116	10.1195	20.6927
GeneID:8761	PABPC4	172.914	64.9919	82.1178	54.172	94.3965
GeneID:54802	TRIT1	14.9823	10.7053	20.2295	8.4238	26.9952
GeneID:10487	CAP1	123.744	59.1081	48.97	62.6886	137.841
GeneID:5538	PPT1	37.7914	64.3	71.5945	84.6906	64.6661
GeneID:6018	RLF	10.4503	5.1535	7.8989	9.5491	10.4459
GeneID:10269	ZMPSTE24	11.6404	9.2648	11.9045	18.2109	19.1085
GeneID:64789	DEM1	5.2501	3.286	5.4193	6.0956	1.5567
GeneID:100130557	NA	2.9815	1.9318	2.1047	2.805	2.8194
GeneID:4802	NFYC	21.8583	17.9945	11.1646	16.4521	24.1371
GeneID:1503	CTPS	17.2209	42.6058	37.454	13.1637	37.101
GeneID:22955	SCMH1	11.5852	7.8014	10.1811	20.7154	15.5918
GeneID:22887	FOXJ3	16.3089	9.9095	12.9628	11.8516	9.4532
GeneID:79717	PPCS	26.0165	8.4718	19.2924	14.0812	8.1498
GeneID:4904	YBX1	355.693	314.783	257.049	237.187	391.975
GeneID:64175	LEPRE1	13.6084	24.8465	20.9615	34.0931	31.3221
GeneID:79078	C1orf50	16.9565	7.93	7.6023	9.1909	10.3729
GeneID:374969	CCDC23	14.1673	15.5369	8.2656	23.6976	23.8661
GeneID:51058	ZNF691	4.8128	11.0874	6.1598	5.8726	8.5409
GeneID:10969	EBNA1BP2	35.7985	45.9104	39.0706	25.2738	63.7675
GeneID:64834	ELOVL1	50.7677	16.6183	43.1073	27.692	48.871
GeneID:112950	MED8	36.7058	10.577	23.1375	28.7583	40.3139
GeneID:23334	SZT2	6.8498	3.1375	6.3597	4.0291	6.5883
GeneID:100132774	NA	2.577	5.7769	2.6088	1.9375	3.1719
GeneID:6487	ST3GAL3	5.6	3.2764	4.1853	4.8829	9.5673
GeneID:9670	IPO13	6.5777	11.0203	5.1012	7.8158	15.0676
GeneID:1802	DPH2	17.9683	28.0844	12.9035	12.5653	28.3914
GeneID:533	ATP6V0B	54.9936	62.5303	43.5689	53.7894	121.079
GeneID:8704	B4GALT2	14.6425	34.1397	22.6167	30.1397	25.6261
GeneID:55929	DMAP1	19.5862	16.9905	12.6438	11.3164	16.7992
GeneID:79033	ERI3	18.7875	47.0473	24.312	15.3683	42.5027
GeneID:55182	RNF220	21.904	42.6859	23.3645	32.6868	27.3119
GeneID:6202	RPS8	1768.78	900.324	1213.65	1376.49	1213.2
GeneID:1263	PLK3	6.8386	3.6626	7.0569	4.1794	6.429
GeneID:8891	EIF2B3	11.2173	11.1583	10.0304	10.8863	37.4947
GeneID:79654	HECTD3	16.6186	18.4583	10.6879	10.4437	25.3912
GeneID:4595	MUTYH	8.8386	19.9795	5.9536	5.118	15.6959
GeneID:114034	TOE1	10.9176	9.8797	8.889	5.5275	16.4601
GeneID:10420	TESK2	7.4794	5.5124	2.866	5.8097	5.7694
GeneID:126661	NA	3.0313	2.1228	1.929	2.9428	4.7551
GeneID:25974	MMACHC	4.1012	5.199	5.2012	5.4906	7.3064
GeneID:5052	PRDX1	148.575	389.382	183.703	287.916	231.964
GeneID:60313	GPBP1L1	29.0195	28.011	22.1995	37.1818	37.6699
GeneID:51249	TMEM69	29.3124	21.6911	26.9063	30.5683	45.0348
GeneID:3652	IPP	4.5892	1.3431	3.0648	2.9219	5.1371
GeneID:23139	MAST2	7.9984	14.546	11.4344	15.6806	13.0658
GeneID:55624	POMGNT1	8.2092	13.1395	17.4015	14.8299	19.7557
GeneID:8438	RAD54L	10.4462	21.7796	13.3596	5.68	22.5842
GeneID:10489	LRRC41	36.0273	18.5773	15.0595	26.0784	34.2603
GeneID:7388	UQCRH	284.126	250.328	220.007	233.642	559.386
GeneID:387338	NSUN4	13.3608	4.1459	9.1181	9.1102	14.7352
GeneID:8569	NA	10.3012	5.1429	10.0283	6.894	14.7433
GeneID:64756	ATPAF1	15.8647	11.9989	7.0386	15.7523	9.6304
GeneID:9813	KIAA0494	21.8226	8.5347	11.1713	6.8454	13.1513
GeneID:6491	STIL	6.5631	6.4411	8.5859	3.9016	14.7005
GeneID:11124	FAF1	25.3564	15.149	32.7654	16.8652	53.9766
GeneID:26994	RNF11	18.0392	8.9174	9.9197	28.0751	11.6019
GeneID:2060	EPS15	25.4203	7.9019	8.5033	13.3116	19.2346
GeneID:114883	OSBPL9	33.434	15.1738	13.0357	25.9821	39.3547
GeneID:4898	NRD1	42.8889	48.4498	36.5938	35.4773	104.519
GeneID:51060	TXNDC12	25.3113	41.5042	38.7999	84.6159	65.7903
GeneID:112970	KTI12	19.8072	7.8836	9.1074	6.7751	15.4858
GeneID:91408	BTF3L4	15.5607	15.2952	23.1061	29.6539	24.1237
GeneID:200014	CC2D1B	7.558	5.0161	7.4428	3.3505	11.5539
GeneID:84950	PRPF38A	29.6025	16.6586	25.7439	14.4722	43.2382
GeneID:23318	ZCCHC11	12.5752	10.2893	13.0601	18.2149	11.1614
GeneID:65260	SELRC1	8.6004	23.3996	15.358	17.4839	26.8889
GeneID:79699	ZYG11B	2.6224	2.322	3.6615	3.924	4.451
GeneID:1376	CPT2	14.011	11.0458	9.9544	8.5847	13.5074
GeneID:54987	C1orf123	22.4144	24.1723	20.0473	29.1973	37.5042
GeneID:4116	MAGOH	47.6047	37.4177	25.8012	39.6018	69.0226
GeneID:7804	LRP8	5.0597	12.6103	11.9594	3.4042	6.3793
GeneID:55706	TMEM48	15.1195	16.8068	21.4081	12.9872	22.8366
GeneID:54432	NA	9.2382	13.7517	4.6754	10.9698	11.3195
GeneID:115353	LRRC42	17.4556	29.5275	19.6368	23.7261	24.5491
GeneID:9528	TMEM59	53.7371	35.2542	81.5922	92.6356	67.2028
GeneID:127428	TCEANC2	4.7981	2.9893	3.5838	2.3608	4.3803
GeneID:606495	CYB5RL	2.163	3.5833	2.8966	1.3731	4.8321
GeneID:51253	MRPL37	87.3052	88.1154	113.981	75.621	117.749
GeneID:23648	SSBP3	5.0614	11.8885	4.6037	5.6226	11.8446
GeneID:100527960	NA	4.0873	4.0653	3.6056	3.1765	5.8988
GeneID:7268	TTC4	12.0018	11.8258	10.4272	9.6341	17.5519
GeneID:25973	PARS2	2.9535	6.7907	3.2935	3.787	6.7296
GeneID:23358	USP24	11.2001	7.0637	7.7518	17.0511	12.5454
GeneID:114803	MYSM1	10.023	6.5572	4.0837	11.1489	6.9482
GeneID:7398	USP1	22.1244	9.945	38.3066	17.2555	22.7816
GeneID:84938	ATG4C	5.63	3.6779	2.7061	3.5303	6.1096
GeneID:29929	ALG6	4.7756	3.7747	3.0861	2.6255	4.7541
GeneID:57708	MIER1	12.2616	3.4873	5.807	6.0139	5.5757
GeneID:26135	SERBP1	81.5362	51.6546	59.145	66.4951	68.5162
GeneID:55635	DEPDC1	3.5041	2.953	8.6964	3.3392	5.7053
GeneID:55631	LRRC40	9.3841	7.1387	5.7877	7.8185	9.4745
GeneID:9295	SRSF11	99.4197	46.6627	65.3256	83.1438	67.0074
GeneID:81573	ANKRD13C	5.0176	2.5493	3.8241	4.9545	3.9119
GeneID:11147	HHLA3	8.0916	8.81	6.2301	5.7336	10.6308
GeneID:100132618	NA	7.2373	4.3738	7.781	3.6091	13.9908
GeneID:9406	ZRANB2	54.1862	19.2447	47.4813	28.3237	60.3836
GeneID:127253	NA	22.3476	7.6423	16.2917	16.3047	15.8963
GeneID:5876	RABGGTB	52.9755	31.0472	54.579	94.6748	48.3188
GeneID:10026	PIGK	3.3862	2.263	4.3896	6.9108	7.1862
GeneID:26009	ZZZ3	9.8589	7.9387	12.3117	14.3906	10.8554
GeneID:23032	USP33	10.2134	8.0332	11.4419	11.7793	15.4106
GeneID:8880	FUBP1	45.1123	55.8933	54.6563	41.3953	48.6448
GeneID:11080	DNAJB4	3.8551	3.3563	4.9938	5.6866	6.9636
GeneID:5567	PRKACB	2.271	3.326	3.109	1.6269	2.7265
GeneID:80135	RPF1	16.31	10.4696	15.4658	11.2261	25.7702
GeneID:2787	GNG5	118.915	47.6008	47.6931	130.783	109.321
GeneID:148423	NA	6.0216	5.7262	4.4073	6.1663	8.2484
GeneID:8915	BCL10	10.2246	3.7663	4.2315	3.903	5.1079
GeneID:54680	ZNHIT6	8.6926	4.0906	4.2075	4.9369	9.3313
GeneID:51100	SH3GLB1	16.1112	4.7955	9.9704	12.6164	11.0591
GeneID:9403	2023-09-15	71.1498	24.748	53.0949	61.5966	78.0253
GeneID:8543	LMO4	5.7428	11.2848	3.0793	8.8565	6.8641
GeneID:5586	PKN2	7.1914	4.1253	13.1663	12.5978	5.6939
GeneID:56267	CCBL2	23.0638	10.8306	7.0691	15.1545	15.0774
GeneID:494115	RBMXL1	16.3918	19.9993	23.8487	13.2569	22.6358
GeneID:55144	LRRC8D	7.0146	14.8748	12.502	19.6795	16.4453
GeneID:284695	ZNF326	7.5672	8.4288	5.4246	6.0367	10.9168
GeneID:84146	ZNF644	6.6443	7.9429	7.8199	11.2704	7.9105
GeneID:343477	NA	101.435	69.4158	96.4144	189.188	71.3774
GeneID:11146	GLMN	5.5679	3.3248	3.338	4.5991	6.5263
GeneID:79871	RPAP2	4.3893	2.4751	4.3414	4.328	5.4705
GeneID:6125	RPL5	1164.78	469.886	925.023	1015.94	603.295
GeneID:22823	MTF2	16.2963	20.2527	8.7365	10.4975	16.2539
GeneID:1810	DR1	20.6847	11.2269	17.1414	15.8598	27.2394
GeneID:30836	DNTTIP2	29.301	24.0631	32.6865	20.9346	32.6495
GeneID:25950	RWDD3	8.4625	5.7181	6.1384	10.9639	9.7759
GeneID:58155	PTBP2	5.3843	9.9071	3.5474	4.554	3.0936
GeneID:178	AGL	7.3712	3.7822	3.5684	6.1255	6.9265
GeneID:64645	HIAT1	29.3405	16.0444	16.0012	29.0541	15.8786
GeneID:163786	SASS6	5.4757	2.4862	7.1082	4.3915	8.1452
GeneID:54482	CCDC76	6.3973	2.2555	4.9776	6.3409	8.2456
GeneID:1629	DBT	2.778	2.8758	2.4581	2.7379	2.1424
GeneID:8634	RTCD1	20.5925	9.1749	8.0224	12.913	21.8588
GeneID:2135	EXTL2	6.2305	12.0019	4.9189	10.2941	11.5777
GeneID:148867	SLC30A7	5.018	1.6146	4.1976	4.1126	1.563
GeneID:51611	DPH5	17.4252	17.1068	12.2181	21.4077	21.7814
GeneID:55599	RNPC3	11.2816	3.5659	6.4219	4.4612	6.6177
GeneID:648740	NA	65.5136	18.1679	30.6938	18.9419	21.5889
GeneID:55170	PRMT6	10.5297	18.437	5.7311	9.0615	18.9424
GeneID:55119	NA	30.2697	19.526	33.8485	18.7362	28.8602
GeneID:6814	STXBP3	9.82	6.3009	13.6806	11.9844	18.2904
GeneID:23155	CLCC1	9.6479	4.4879	10.5122	8.0643	14.1054
GeneID:22911	WDR47	2.3661	1.4219	4.0475	2.6227	2.628
GeneID:6884	TAF13	13.7734	10.3689	13.0069	11.2721	21.6458
GeneID:6301	NA	30.1074	29.2295	31.1557	53.0007	72.4276
GeneID:5686	PSMA5	30.0559	28.6706	31.8172	35.5304	47.8419
GeneID:127002	ATXN7L2	4.198	4.3217	5.4561	1.4604	3.7198
GeneID:284613	CYB561D1	5.3882	2.0942	3.2282	2.4161	3.9153
GeneID:2773	GNAI3	28.4838	18.1112	37.5366	20.5175	34.9697
GeneID:271	AMPD2	20.2602	13.7682	19.3902	25.8147	15.8312
GeneID:10768	AHCYL1	26.4759	30.4016	37.7862	46.1	40.3472
GeneID:85369	FAM40A	11.2564	19.2579	12.6275	13.5681	14.0507
GeneID:64783	RBM15	16.0226	8.3799	12.898	4.7456	8.8423
GeneID:10542	HBXIP	124.604	41.9343	82.6095	89.5746	123.821
GeneID:79084	WDR77	18.2265	32.5533	19.6511	21.7482	36.9719
GeneID:515	ATP5F1	89.5885	40.8679	79.2199	56.7344	136.49
GeneID:11218	DDX20	6.6725	8.6088	10.0838	5.0974	10.0166
GeneID:4343	MOV10	21.1586	27.0286	25.5875	23.2381	43.4326
GeneID:246182	NA	4.5651	4.7901	3.9835	3.5857	8.3701
GeneID:9860	LRIG2	3.9479	8.0072	5.4331	5.7303	3.9893
GeneID:10745	PHTF1	6.5397	5.6495	5.8077	3.0114	8.0336
GeneID:54665	RSBN1	5.6633	2.014	2.8821	4.5146	4.6919
GeneID:10717	AP4B1	18.0601	5.6259	8.6695	4.6857	11.7721
GeneID:64858	DCLRE1B	4.5882	3.9256	9.8981	3.9878	9.1346
GeneID:204851	HIPK1	7.6266	10.2628	10.878	13.5901	14.8646
GeneID:51592	TRIM33	8.886	8.5639	13.3877	13.3147	11.5525
GeneID:10286	BCAS2	26.4448	17.4499	24.9645	18.8404	31.4173
GeneID:4893	NRAS	35.2518	15.4459	27.7259	26.7666	32.0133
GeneID:7812	CSDE1	241.68	140.137	192.729	180.589	157.228
GeneID:80143	SIKE1	9.5174	6.6309	11.0411	10.1899	11.3369
GeneID:81839	VANGL1	2.0764	4.6963	5.6606	2.2449	3.9918
GeneID:476	ATP1A1	210.847	150.695	129.746	379.803	128.176
GeneID:84852	NA	28.2272	17.2547	17.5386	51.9333	16.5756
GeneID:8458	TTF2	16.7909	15.5013	14.2426	4.9176	14.8496
GeneID:54834	GDAP2	1.4614	1.1511	1.3293	1.5975	1.4521
GeneID:10885	WDR3	13.5545	17.9423	20.7957	14.0432	19.3746
GeneID:100286793	NA	9.1619	7.3436	9.4364	6.684	3.3382
GeneID:653505	PPIAL4B	5.2153	7.3468	10.9309	4.3263	4.2997
GeneID:767846	NA	6.6415	4.3771	3.2602	2.0075	3.3232
GeneID:9939	RBM8A	13.542	12.1083	18.9312	7.8903	14.9869
GeneID:114814	NA	6.7699	5.757	9.9842	3.4851	7.8331
GeneID:10623	POLR3C	16.926	10.6633	19.5597	10.2106	23.257
GeneID:27246	RNF115	15.6444	8.7177	11.8254	8.6042	14.8343
GeneID:653519	GPR89A	13.5255	10.6353	13.9145	13.4688	12.9989
GeneID:728932	GPR89C	10.5825	7.225	10.404	9.8766	8.9208
GeneID:171423	NA	110.763	125.68	152.595	232.188	102.711
GeneID:9557	CHD1L	19.1789	19.6249	24.6715	48.5667	25.0369
GeneID:51463	GPR89B	10.0331	7.3083	10.1052	9.5435	8.6147
GeneID:388685	NA	8.9599	4.0848	8.8356	6.1294	3.9391
GeneID:164022	PPIAL4A	6.2617	8.983	12.4766	5.0717	5.1225
GeneID:653598	PPIAL4C	5.1317	8.2346	10.4038	4.2537	4.1922
GeneID:10262	SF3B4	35.9768	51.4939	40.0465	23.721	37.2684
GeneID:56957	OTUD7B	4.9723	4.8869	7.0398	5.5557	4.9049
GeneID:11311	VPS45	9.0496	9.7015	12.4538	5.6755	11.2645
GeneID:81611	ANP32E	63.3696	35.1353	38.5261	20.1006	50.361
GeneID:51107	APH1A	71.5707	58.4121	75.8502	55.3019	51.5154
GeneID:54460	MRPS21	78.4453	85.0865	111.946	54.1515	85.0685
GeneID:9129	PRPF3	18.7931	18.0553	20.2507	13.9747	18.5436
GeneID:23248	RPRD2	10.159	8.1641	12.8579	6.7839	7.1319
GeneID:80222	TARS2	22.3629	18.8752	19.9524	9.1104	19.0443
GeneID:2029	ENSA	47.0325	31.9497	39.6965	26.4276	40.6947
GeneID:55204	GOLPH3L	13.083	8.6993	10.8097	5.7777	11.0767
GeneID:405	ARNT	14.3619	7.7273	16.1341	11.3807	13.2
GeneID:9869	NA	12.8146	16.5959	19.7905	12.528	11.9809
GeneID:55793	FAM63A	4.3949	4.0624	7.0006	6.3435	5.117
GeneID:58497	PRUNE	7.3265	13.1152	12.1713	11.1547	15.0529
GeneID:54964	C1orf56	12.1017	4.3426	12.7573	4.1919	13.7351
GeneID:100534012	TNFAIP8L2-SCNM1	14.7871	9.6165	12.4819	4.9804	11.7993
GeneID:388695	LYSMD1	4.7623	3.0136	6.287	4.1345	3.6839
GeneID:79005	NA	17.088	11.7096	15.5331	6.1044	14.8498
GeneID:6944	VPS72	23.7413	45.0073	36.8733	18.4982	40.4904
GeneID:8394	PIP5K1A	18.184	17.6345	16.1954	16.3768	6.8924
GeneID:5710	PSMD4	68.3585	86.6172	75.3018	68.8994	99.8631
GeneID:57592	ZNF687	17.3174	24.7531	12.727	11.0085	12.2739
GeneID:5298	PI4KB	22.95	9.8447	14.0357	8.3204	19.7517
GeneID:5692	PSMB4	234.524	323.504	206.179	162.55	210.369
GeneID:23126	POGZ	21.3239	23.9937	17.2112	13.3315	9.4497
GeneID:65005	MRPL9	44.0297	40.7268	68.133	35.0671	46.4212
GeneID:26097	CHTOP	32.8376	52.3674	43.425	28.1471	37.4622
GeneID:23557	SNAPIN	22.2516	13.4879	23.334	10.6278	16.6627
GeneID:3608	ILF2	125.803	214.496	117.732	125.682	184.676
GeneID:65123	INTS3	33.9349	36.6579	20.2256	11.4802	15.1426
GeneID:57459	GATAD2B	12.0935	7.2917	10.2351	4.1597	4.6725
GeneID:9909	DENND4B	27.4821	20.3407	17.9981	9.9774	23.2057
GeneID:200186	CRTC2	32.9697	13.222	21.3932	11.6195	12.2963
GeneID:148327	CREB3L4	8.4074	21.6713	13.6852	6.2929	9.7089
GeneID:10899	JTB	99.5313	35.8175	71.1433	43.3545	83.8982
GeneID:6232	RPS27	158.42	144.9	136.307	85.918	70.9114
GeneID:7170	TPM3	57.9415	33.8841	37.9136	23.7133	52.6625
GeneID:25912	C1orf43	114.467	60.1136	193.212	139.256	101.084
GeneID:9898	UBAP2L	38.1971	71.2035	50.0457	28.9877	50.1655
GeneID:10456	HAX1	59.3371	41.7164	64.1594	46.2361	117.504
GeneID:55585	UBE2Q1	31.3569	20.6692	23.7235	21.913	18.7391
GeneID:103	ADAR	110.659	73.2791	45.9022	37.2558	31.5756
GeneID:57326	PBXIP1	33.3495	15.5295	14.2331	18.175	9.6311
GeneID:90780	PYGO2	18.2577	17.8284	23.6922	16.4943	19.2752
GeneID:1163	CKS1B	57.7754	86.8159	123.828	37.3218	133.185
GeneID:51043	ZBTB7B	17.0082	12.213	14.5197	9.0147	17.927
GeneID:1945	EFNA4	4.3131	14.1535	8.2053	6.5727	3.8207
GeneID:55974	SLC50A1	24.859	20.6075	38.5889	19.6347	34.3132
GeneID:54344	DPM3	43.7219	27.6545	35.0552	30.305	50.9982
GeneID:200185	KRTCAP2	63.0615	80.1676	87.4929	34.8699	135.039
GeneID:4580	MTX1	21.193	26.9995	30.6075	18.9901	29.3886
GeneID:10712	FAM189B	11.82	22.5137	16.4366	13.3798	11.3695
GeneID:10067	SCAMP3	44.7098	26.04	47.4792	27.5109	54.6426
GeneID:1196	CLK2	20.7792	23.0394	20.4004	15.765	19.9698
GeneID:2224	FDPS	156.978	97.8925	87.4184	143.783	105.037
GeneID:284618	RUSC1-AS1	51.0823	30.3034	24.6012	38.5094	34.1295
GeneID:55870	ASH1L	8.6785	3.6901	11.827	7.8804	6.0418
GeneID:55154	MSTO1	19.0939	22.4084	14.1552	10.3855	22.9134
GeneID:55249	YY1AP1	29.8955	16.6465	32.3194	17.0476	20.2379
GeneID:7818	DAP3	39.9612	26.7247	62.1881	42.8279	74.42
GeneID:100129405	NA	21.2314	12.0554	15.4258	11.2225	22.8223
GeneID:54856	GON4L	13.3841	12.0262	12.1046	7.8596	13.7215
GeneID:6016	RIT1	9.6836	6.1481	10.2691	8.8038	7.4681
GeneID:22889	KIAA0907	23.4518	17.8847	38.9814	25.2958	24.1342
GeneID:6746	SSR2	236.562	120.448	143.069	144.006	189.023
GeneID:56893	UBQLN4	11.3866	12.9321	24.0415	19.2202	22.5119
GeneID:28956	LAMTOR2	40.1845	42.9787	30.4426	21.5724	40.0651
GeneID:9673	SLC25A44	12.5622	12.7316	8.0211	9.2025	6.7271
GeneID:11243	PMF1	34.3815	71.5951	41.46	30.761	31.9753
GeneID:100527963	PMF1-BGLAP	25.4733	56.8724	34.046	26.9737	24.6192
GeneID:23381	SMG5	26.3154	49.5598	21.1804	35.9407	29.4556
GeneID:84283	TMEM79	2.9376	1.3857	3.1349	1.6833	4.6246
GeneID:112770	C1orf85	12.3939	30.4393	12.283	27.1159	14.6131
GeneID:7203	NA	119.135	224.066	206.43	161.653	199.166
GeneID:128240	APOA1BP	33.7056	59.6623	82.6845	31.6939	62.1229
GeneID:54865	GPATCH4	25.6991	35.4769	27.6962	16.427	30.7221
GeneID:81875	ISG20L2	21.0931	21.639	26.1597	9.9115	27.18
GeneID:51093	RRNAD1	11.1493	11.1962	19.6405	10.262	19.2959
GeneID:79590	MRPL24	48.6795	22.1217	49.5182	18.4805	50.6992
GeneID:3068	HDGF	82.2793	127.365	180.475	92.8344	116.304
GeneID:5546	PRCC	33.8981	42.4948	27.3073	20.9727	34.2151
GeneID:2117	ETV3	3.757	4.1947	5.8045	2.8002	3.7223
GeneID:2117	ETV3	3.757	4.1947	5.8045	2.8002	3.7223
GeneID:93183	PIGM	3.0782	3.867	1.6718	4.0212	4.3797
GeneID:8682	PEA15	42.2414	32.451	51.29	16.7591	29.7597
GeneID:50717	NA	26.2209	24.379	20.7245	22.0769	22.2228
GeneID:5824	PEX19	15.6458	19.303	21.3438	23.6682	20.2449
GeneID:1314	COPA	68.0502	35.4302	60.2187	71.3501	64.4644
GeneID:474338	NA	33.3968	31.9931	14.6457	40.0942	20.3003
GeneID:23385	NCSTN	29.7042	31.4644	47.9243	77.3909	37.2028
GeneID:7391	USF1	30.7715	28.0569	16.7681	9.4211	19.6674
GeneID:5202	PFDN2	63.0752	61.0268	104.522	65.1507	116.618
GeneID:4817	NIT1	13.2946	14.3887	15.885	12.1796	13.8412
GeneID:9191	DEDD	20.1422	18.1548	17.7024	14.838	14.0113
GeneID:51506	UFC1	99.4792	55.2375	69.7605	51.5716	73.8746
GeneID:27005	USP21	9.8058	10.0313	20.285	9.6771	14.3897
GeneID:5498	PPOX	8.9681	15.3179	10.7854	5.4145	15.3269
GeneID:8703	B4GALT3	29.8094	17.0843	19.2547	24.1617	28.8544
GeneID:4720	NDUFS2	61.2572	55.1568	47.9957	67.6728	51.922
GeneID:84134	TOMM40L	5.3386	7.7904	4.9194	8.9328	13.0924
GeneID:6391	SDHC	25.5357	20.1593	32.3338	39.6017	27.8901
GeneID:641311	NA	17.0584	6.85	17.2608	27.0286	7.2942
GeneID:11266	DUSP12	17.5562	13.9946	26.9694	20.0283	25.1139
GeneID:22926	ATF6	19.8607	6.8771	22.4147	20.8599	25.3676
GeneID:83540	NUF2	13.8741	5.324	18.4946	8.9992	18.9723
GeneID:4259	MGST3	21.5757	35.9876	33.0826	13.5934	35.6674
GeneID:223	ALDH9A1	26.1854	26.9705	36.1479	17.2666	24.4733
GeneID:54499	TMCO1	15.8627	6.6117	16.4805	16.0344	24.3112
GeneID:7371	UCK2	11.9388	23.9352	26.2244	12.8553	17.3271
GeneID:57645	POGK	14.4676	17.9789	26.1931	10.8431	19.5841
GeneID:117143	TADA1	10.7804	8.0055	9.9359	12.1752	10.1636
GeneID:5451	POU2F1	5.4009	7.5986	4.0748	2.8694	2.4079
GeneID:9019	MPZL1	8.4273	18.3283	25.6577	18.9366	17.8595
GeneID:92342	METTL18	8.3647	2.5884	9.103	4.245	7.342
GeneID:55732	C1orf112	5.5127	8.58	8.6409	2.7739	10.228
GeneID:57147	SCYL3	7.414	2.9432	4.4635	2.8606	4.4509
GeneID:92344	GORAB	4.9809	2.7062	3.8236	1.8808	3.7193
GeneID:7151	NA	10.4118	9.8573	14.6272	12.1296	11.007
GeneID:23215	PRRC2C	44.889	50.9587	39.8635	29.4093	37.3185
GeneID:51603	METTL13	18.1949	30.8135	16.6644	11.2625	28.3211
GeneID:5279	PIGC	14.9186	13.4908	26.5382	19.3439	33.9135
GeneID:51430	C1orf9	7.7384	6.838	6.2298	11.1048	6.6138
GeneID:9588	PRDX6	65.356	251.862	159.251	157.592	232.467
GeneID:27252	KLHL20	4.1584	3.536	6.1327	4.8082	6.9001
GeneID:55157	DARS2	13.4082	13.4524	20.1879	9.4899	30.0778
GeneID:692196	NA	47.5731	29.598	94.1429	26.3619	80.1503
GeneID:149041	RC3H1	5.0846	1.5407	2.1021	2.32	1.971
GeneID:27101	CACYBP	28.2834	20.7084	34.0253	16.7865	57.0439
GeneID:63931	NA	16.6756	11.7577	14.9524	19.0727	18.105
GeneID:64326	RFWD2	12.5817	10.4276	11.5265	10.8231	19.572
GeneID:9917	FAM20B	8.6681	8.0827	11.2655	14.5398	19.0381
GeneID:64222	TOR3A	31.7943	16.5549	16.8717	26.1424	32.7789
GeneID:163590	TOR1AIP2	3.5852	2.6844	9.227	5.4645	4.3293
GeneID:9857	CEP350	7.7958	3.2252	7.7333	6.2146	8.3205
GeneID:100527964	NA	1.9391	2.442	3.1351	2.388	3.9515
GeneID:84320	ACBD6	29.8476	27.3576	29.7898	17.7403	40.5955
GeneID:9213	XPR1	3.8467	7.5546	4.8484	8.0282	12.3483
GeneID:10228	STX6	12.2717	13.5522	13.8025	9.8075	6.3584
GeneID:1660	DHX9	44.4539	68.7216	43.8352	34.4096	73.2368
GeneID:9887	SMG7	23.2556	20.7688	20.4281	16.3801	19.7654
GeneID:6045	RNF2	5.0828	8.0471	4.4763	8.3955	10.0419
GeneID:81627	TRMT1L	6.9226	4.2804	4.7055	4.7616	9.5669
GeneID:10625	IVNS1ABP	30.7626	56.1701	34.5723	30.9758	21.6856
GeneID:7175	TPR	25.5139	23.1516	34.4503	21.9205	31.6428
GeneID:54953	C1orf27	6.2965	2.8955	9.4785	7.9569	9.6328
GeneID:100616345	NA	801.605	519.782	925.054	823.904	327.223
GeneID:6738	TROVE2	11.1205	4.1505	8.0592	6.7203	8.8516
GeneID:79577	CDC73	6.9411	6.1254	7.7147	6.6422	9.4935
GeneID:259266	ASPM	7.4687	5.6124	19.3691	5.1157	13.8539
GeneID:23528	ZNF281	10.2791	20.3133	16.7614	10.989	8.9166
GeneID:83479	DDX59	11.1259	5.2745	18.6719	6.8627	8.4398
GeneID:252839	TMEM9	22.617	68.2308	51.807	41.0658	52.3044
GeneID:376693	NA	22.1341	19.7931	32.071	18.7739	15.0268
GeneID:55705	IPO9	9.1438	21.7681	26.8106	7.2966	17.1535
GeneID:10440	TIMM17A	33.9365	21.3603	33.6438	28.6661	72.4988
GeneID:6051	RNPEP	25.1864	28.2475	24.8496	18.5553	53.2054
GeneID:29089	UBE2T	26.3635	43.183	59.5378	18.3431	65.3366
GeneID:4660	PPP1R12B	1.374	1.91	3.3421	1.9355	2.5541
GeneID:5877	RABIF	5.3551	3.8969	8.5259	5.7343	10.4599
GeneID:59349	KLHL12	19.1464	12.8269	11.0536	8.6097	14.3132
GeneID:51094	ADIPOR1	37.3962	27.0233	53.6187	49.2159	55.3786
GeneID:51706	CYB5R1	11.6439	8.359	19.0428	12.981	24.0581
GeneID:92703	TMEM183A	19.4448	17.9882	23.1526	15.7312	32.604
GeneID:9877	ZC3H11A	41.1916	12.2259	46.7813	26.3546	29.1023
GeneID:6635	SNRPE	37.3186	20.2393	33.3138	24.7757	43.576
GeneID:84919	PPP1R15B	20.8451	10.2367	30.763	13.9104	14.0593
GeneID:4194	MDM4	10.9226	4.4502	8.0525	3.785	3.6927
GeneID:5929	RBBP5	6.3658	5.1955	8.4544	4.7725	11.5704
GeneID:25778	DSTYK	1.5335	3.461	5.9944	2.4702	5.081
GeneID:64710	NUCKS1	40.4817	79.4023	72.9725	40.1677	69.7723
GeneID:8934	RAB7L1	9.5989	4.076	9.3485	5.4287	5.4336
GeneID:1939	EIF2D	51.9946	21.5464	45.7329	25.5383	54.8957
GeneID:9261	MAPKAPK2	39.7549	18.6417	22.0599	16.8888	32.3027
GeneID:27042	DIEXF	3.4465	2.4863	7.2432	3.3647	3.8856
GeneID:55758	RCOR3	9.8067	3.8966	6.8543	7.8791	7.5761
GeneID:4751	NEK2	7.035	4.1738	14.5551	5.5577	14.226
GeneID:25896	NA	8.7978	6.0026	14.662	5.4291	13.8541
GeneID:5525	PPP2R5A	19.9527	8.6446	9.9438	16.4192	29.8802
GeneID:55248	TMEM206	7.4187	7.0271	4.4821	4.062	6.1438
GeneID:29937	NA	34.4312	21.6737	36.1912	15.0628	38.7014
GeneID:467	ATF3	16.8941	8.7104	24.3871	17.8148	12.5991
GeneID:25936	NSL1	2.5164	2.2071	2.445	3.289	3.9548
GeneID:128387	TATDN3	5.6713	3.139	4.1695	3.033	9.0422
GeneID:28982	FLVCR1	6.143	12.9313	4.7474	9.3966	4.3198
GeneID:90806	ANGEL2	6.0427	4.7377	4.8016	3.5361	3.7472
GeneID:26750	RPS6KC1	3.8612	5.4965	3.747	8.3817	11.5154
GeneID:1063	CENPF	14.189	25.9407	16.5729	10.9535	21.5268
GeneID:51018	RRP15	3.5577	3.9251	2.7963	3.5305	5.9115
GeneID:2058	EPRS	55.7439	37.2016	37.0593	43.0638	92.0911
GeneID:10380	BPNT1	18.5354	4.9648	9.4489	16.8175	14.2296
GeneID:55699	IARS2	37.4735	31.9991	47.35	68.3133	46.9977
GeneID:25782	RAB3GAP2	16.1546	8.101	8.0287	9.1064	12.9827
GeneID:6791	NA	3.413	2.897	6.4884	3.4596	5.0065
GeneID:9015	TAF1A	2.0986	2.422	2.0057	2.203	4.2774
GeneID:375056	MIA3	7.6197	7.8864	6.1467	10.2012	12.6835
GeneID:64853	AIDA	14.1648	13.503	17.3575	18.2236	20.487
GeneID:148362	BROX	6.6775	5.0366	12.9786	7.0743	12.5891
GeneID:23219	FBXO28	5.7123	5.5493	9.4203	5.3571	6.5058
GeneID:8560	DEGS1	23.9333	18.596	33.9552	16.4248	21.0774
GeneID:4931	NVL	7.4331	13.2215	12.7133	4.3056	16.7416
GeneID:29097	CNIH4	27.3405	80.9746	62.7134	50.0029	45.6129
GeneID:80232	WDR26	28.2331	13.9402	17.914	25.1385	19.7387
GeneID:9725	TMEM63A	12.0608	10.3609	11.0541	14.868	18.6644
GeneID:163859	C1orf55	7.9808	3.8501	5.8656	5.149	11.5552
GeneID:3020	H3F3A	127.992	95.7693	123.269	155.208	295.077
GeneID:64746	ACBD3	17.9004	8.8984	13.9845	19.5579	15.6022
GeneID:100130093	NA	6.019	4.9467	4.3331	5.2848	8.2796
GeneID:65094	JMJD4	8.52	7.2109	6.6501	8.207	12.9576
GeneID:116841	SNAP47	14.6131	18.0556	13.0861	8.8914	16.8101
GeneID:375	ARF1	174.362	131.27	105.692	144.951	267.215
GeneID:79169	C1orf35	12.6358	16.691	10.7626	7.2617	19.5944
GeneID:128308	MRPL55	25.1222	26.8081	13.0174	17.324	33.5323
GeneID:2987	GUK1	95.9934	34.1879	43.4389	41.9965	75.3767
GeneID:200205	IBA57	2.5324	2.0904	2.209	2.1683	2.5459
GeneID:81559	TRIM11	11.3213	10.5062	8.9344	8.0946	21.6699
GeneID:149603	RNF187	45.7193	34.4374	26.8025	33.8301	78.6048
GeneID:126731	C1orf96	2.0827	2.6988	5.4902	3.7717	5.1067
GeneID:55746	NUP133	12.5786	19.0311	11.8667	15.1152	22.2548
GeneID:27097	TAF5L	7.5771	5.5735	5.3448	3.7359	7.8197
GeneID:9816	URB2	4.8864	10.4197	4.3841	4.1319	7.4015
GeneID:2590	GALNT2	24.4676	34.7058	63.286	62.2143	57.7008
GeneID:22796	COG2	8.5378	11.1395	7.6237	15.2801	11.582
GeneID:79573	TTC13	5.9524	2.2513	6.6239	5.7375	4.8995
GeneID:128061	C1orf131	11.4669	4.7009	9.2107	13.9301	17.3332
GeneID:8443	GNPAT	21.3628	18.5548	16.923	41.1226	26.1135
GeneID:149371	EXOC8	5.1182	2.2586	3.422	3.1773	3.8567
GeneID:83932	C1orf124	2.1933	1.8227	2.1656	2.595	5.7751
GeneID:7257	TSNAX	18.3882	8.4672	9.8486	13.7909	27.5556
GeneID:84284	NTPCR	25.3922	34.8108	20.9978	14.0052	24.5763
GeneID:6894	TARBP1	13.437	6.4103	8.9179	11.7145	7.6118
GeneID:9804	TOMM20	78.328	65.6766	127.95	222.706	148.547
GeneID:23029	RBM34	27.4167	12.1924	21.6201	18.2594	24.6651
GeneID:51742	ARID4B	12.74	5.8915	5.0365	10.1943	6.3253
GeneID:9453	NA	7.5629	7.5084	8.3582	16.1113	18.1291
GeneID:6905	TBCE	9.665	17.2639	7.2123	20.2444	23.2664
GeneID:148789	B3GALNT2	5.6287	8.3387	7.042	10.7972	8.282
GeneID:128178	EDARADD	300.163	168.243	310.59	324.257	240.376
GeneID:55127	HEATR1	15.7169	16.2049	12.8947	19.3394	25.3665
GeneID:4548	MTR	10.5675	5.053	9.9851	12.5062	7.0457
GeneID:100130331	NA	5.5408	3.9718	5.1717	2.1464	1.4449
GeneID:2271	FH	44.7642	34.2642	45.8719	38.9776	94.3763
GeneID:8564	KMO	4.3901	1.1117	3.5354	4.1872	2.3912
GeneID:23596	OPN3	6.8602	5.7847	11.3126	12.2272	9.3354
GeneID:731275	NA	5.1793	4.4669	3.2624	5.2411	8.936
GeneID:9859	CEP170	10.9356	7.6766	17.4705	7.0208	11.7838
GeneID:10806	SDCCAG8	8.9596	4.1461	7.4911	3.6522	8.9238
GeneID:159	ADSS	18.5136	22.9374	16.999	16.6653	25.76
GeneID:51029	PPPDE1	7.2816	27.9376	18.6146	18.4945	17.1953
GeneID:116228	FAM36A	16.7144	8.3497	26.4384	26.6847	31.0506
GeneID:284702	NA	15.4837	7.4417	26.0331	20.8948	24.3522
GeneID:3192	HNRNPU	94.3679	104.335	82.698	70.4154	110.515
GeneID:64216	TFB2M	15.4947	6.796	16.8036	13.9659	26.3906
GeneID:163882	CNST	6.0939	4.2317	5.0107	6.3574	9.7263
GeneID:25909	AHCTF1	6.0166	3.4977	11.9765	11.1292	9.4373
GeneID:93474	ZNF670	1.6174	2.4858	1.0008	3.6887	2.3594
GeneID:79862	ZNF669	3.6003	4.4049	2.8975	2.5341	3.9301
GeneID:84838	ZNF496	9.9876	18.51	13.7281	11.8298	22.5537
GeneID:80851	SH3BP5L	9.0425	14.4941	9.6071	7.4171	13.1127
GeneID:79894	ZNF672	22.8844	14.1273	17.8214	10.7744	25.3749
GeneID:55657	ZNF692	15.6291	14.6348	25.847	11.8885	23.1137
GeneID:267002	PGBD2	1.8749	3.1962	2.8906	2.1355	6.8174
GeneID:52	ACP1	61.1099	60.5726	92.899	156.063	55.7258
GeneID:129787	TMEM18	15.9358	11.0035	33.8502	23.7619	13.0839
GeneID:7260	TSSC1	22.4269	16.9337	18.6387	30.1682	18.0317
GeneID:51112	TTC15	21.1404	15.7284	12.71	19.2813	19.0374
GeneID:55256	ADI1	15.6558	20.9106	27.5705	33.8514	32.9822
GeneID:246243	RNASEH1	12.007	15.3168	13.5962	14.9827	14.264
GeneID:100506054	NA	3.6708	8.2703	9.1225	9.8771	4.529
GeneID:6201	RPS7	455.247	188.564	418.462	646.157	288.92
GeneID:57498	KIDINS220	8.7308	9.6931	7.4396	14.1175	13.7887
GeneID:51692	CPSF3	31.5079	48.2939	29.6272	37.1809	43.7878
GeneID:6868	ADAM17	9.8589	7.7093	13.3645	14.7782	12.8295
GeneID:10971	YWHAQ	144.498	135.932	132.375	151.664	133.46
GeneID:9014	TAF1B	2.8409	3.7438	3.924	7.7865	5.3952
GeneID:79954	NOL10	9.1579	7.7098	10.5501	14.7117	12.3175
GeneID:245973	ATP6V1C2	50.9262	35.4698	41.5413	137.13	43.6054
GeneID:10130	PDIA6	158.783	182.756	136.352	466.055	153.014
GeneID:1653	DDX1	32.6553	60.9088	68.7603	67.4054	80.4619
GeneID:79677	SMC6	10.5476	10.0429	8.7979	12.863	15.8506
GeneID:348654	GEN1	8.3054	2.3947	4.0173	2.7254	5.4546
GeneID:57665	RDH14	11.35	7.8455	11.537	14.4118	6.9158
GeneID:100526794	NT5C1B-RDH14	5.1077	3.3968	5.6285	7.1104	3.1445
GeneID:57539	WDR35	2.9668	5.3865	5.1366	4.9217	2.4524
GeneID:23369	PUM2	29.8832	18.2018	23.7068	46.4131	18.4805
GeneID:64342	HS1BP3	4.8005	7.012	6.4394	11.4715	10.1588
GeneID:60526	C2orf43	14.4285	7.3439	7.0623	15.7746	17.2507
GeneID:54454	ATAD2B	4.415	1.8286	1.4795	3.8496	3.3025
GeneID:165324	UBXN2A	10.9231	4.8833	9.0469	10.8109	11.8155
GeneID:80304	C2orf44	4.5307	9.3991	4.8325	9.9069	6.8772
GeneID:51639	SF3B14	96.1627	47.5055	120.627	98.5079	98.6726
GeneID:8648	NCOA1	8.3237	5.1287	3.2398	4.9136	7.6523
GeneID:391356	PTRHD1	65.1528	46.8412	76.2353	50.7141	51.9787
GeneID:79172	CENPO	19.7139	22.3976	22.4779	7.9682	20.13
GeneID:55252	ASXL2	4.7889	6.8931	10.6409	14.384	8.8734
GeneID:10890	RAB10	26.6036	26.2444	35.3884	44.4554	57.4164
GeneID:3030	HADHA	77.8383	51.8154	56.394	111.042	95.5598
GeneID:3032	HADHB	41.9199	21.3193	26.4555	66.6648	47.2589
GeneID:1058	CENPA	10.1377	5.9048	12.0413	8.3126	16.2602
GeneID:54867	TMEM214	49.116	21.1514	26.5978	57.962	52.6714
GeneID:60509	AGBL5	19.0762	22.678	22.8596	32.9113	27.4311
GeneID:100128731	OST4	370.768	159.878	127.283	283.181	211.12
GeneID:51374	C2orf28	44.3389	58.2071	58.2485	79.307	42.7074
GeneID:790	CAD	19.5734	64.7069	34.3707	19.6706	33.6339
GeneID:4358	MPV17	56.8999	32.1136	38.5482	45.2383	45.3762
GeneID:2976	GTF3C2	28.9423	39.7249	27.223	34.4949	25.5891
GeneID:100505624	NA	13.0549	16.0666	15.0506	16.4021	13.5972
GeneID:8890	EIF2B4	13.4811	28.7539	21.4552	47.7808	28.2901
GeneID:9784	SNX17	56.3274	39.2133	29.1148	58.1568	41.19
GeneID:5496	PPM1G	77.7047	149.721	122.772	112.153	102.288
GeneID:26160	IFT172	3.7743	4.2251	6.4582	7.0925	6.9057
GeneID:84450	ZNF512	16.0491	10.2178	10.5733	20.0668	29.4928
GeneID:11321	NA	23.324	23.7164	27.6477	28.4977	22.6449
GeneID:9913	SUPT7L	12.6427	8.8228	19.142	21.4798	19.9285
GeneID:22950	SLC4A1AP	11.2231	7.1718	11.5688	16.4297	11.7518
GeneID:9577	BRE	17.4877	8.15	11.4517	15.8449	13.0781
GeneID:5500	PPP1CB	41.8702	21.0333	48.0498	42.1396	28.489
GeneID:55006	TRMT61B	7.9051	10.2607	13.3349	14.444	9.0149
GeneID:23160	WDR43	29.7003	32.3288	31.8064	51.8327	29.3207
GeneID:51646	YPEL5	29.8383	8.284	20.6745	32.8756	13.5718
GeneID:253558	LCLAT1	2.5655	2.5761	4.5679	5.8367	3.2874
GeneID:84661	DPY30	44.3193	57.0773	61.1166	68.4437	47.191
GeneID:6683	SPAST	3.9395	3.3204	2.7762	9.0745	5.8208
GeneID:55676	SLC30A6	8.0288	5.63	7.3643	12.9969	10.0634
GeneID:57448	BIRC6	12.7694	7.447	8.2761	18.1469	9.1435
GeneID:55622	TTC27	11.6741	10.2753	10.553	17.5878	20.1873
GeneID:25940	FAM98A	27.9667	29.3936	11.0688	21.0436	21.7567
GeneID:6801	STRN	3.5792	2.6689	4.5401	4.8705	5.8395
GeneID:54497	HEATR5B	8.7055	4.0218	5.3497	6.46	4.775
GeneID:100505876	NA	15.9079	8.6289	17.4998	21.8221	21.6451
GeneID:10153	CEBPZ	27.4924	53.8299	35.5808	35.6544	27.6875
GeneID:55471	C2orf56	9.7157	20.5214	7.5986	14.1682	5.7968
GeneID:23683	PRKD3	7.8382	7.9874	13.9001	10.2179	6.11
GeneID:64225	ATL2	13.9729	14.0473	19.498	43.0246	16.6091
GeneID:92906	HNRPLL	8.5745	12.0153	8.2682	16.7418	19.6408
GeneID:6432	SRSF7	87.1563	128.483	53.2523	40.6832	85.9176
GeneID:79833	GEMIN6	15.622	16.4309	15.4431	27.7115	12.3837
GeneID:90957	DHX57	5.734	9.6909	5.0134	7.1799	5.1186
GeneID:729967	MORN2	5.8585	5.4615	18.015	6.4495	11.7461
GeneID:80745	NA	7.4039	4.5343	9.1429	8.0447	6.5608
GeneID:9167	COX7A2L	154.531	53.6481	92.1723	151.959	140.052
GeneID:678	ZFP36L2	32.5646	25.662	24.9388	55.6811	26.6059
GeneID:63892	THADA	5.8755	5.5995	5.3724	5.8761	8.2096
GeneID:51626	DYNC2LI1	6.9307	2.1488	4.2806	6.9054	7.1004
GeneID:10128	LRPPRC	43.4558	37.9631	48.076	90.4645	47.8933
GeneID:6519	SLC3A1	2.5368	2.9611	4.0041	5.2244	6.2388
GeneID:9581	PREPL	5.8746	5.014	8.3565	9.4488	12.9368
GeneID:79823	CAMKMT	3.934	8.2964	2.5066	4.8448	2.09
GeneID:55133	SRBD1	7.6255	6.3089	3.4102	5.8004	6.0876
GeneID:5281	PIGF	33.3063	12.041	11.467	36.4686	18.8113
GeneID:9655	SOCS5	3.2872	5.1467	5.6762	11.4282	3.0098
GeneID:57217	TTC7A	14.1639	6.0007	8.7133	15.3076	5.4313
GeneID:805	CALM2	221.737	109.237	211.609	349.191	222.183
GeneID:4436	MSH2	20.813	75.7283	38.6489	20.1223	48.191
GeneID:2956	MSH6	24.5699	69.034	51.8822	31.5746	35.5429
GeneID:80204	FBXO11	13.4569	8.4116	16.6318	26.7639	16.6661
GeneID:129285	KLRAQ1	14.041	5.7339	4.6326	10.3641	3.6373
GeneID:51130	ASB3	8.5384	6.346	7.9441	12.8635	5.7441
GeneID:100302652	GPR75-ASB3	9.966	8.4028	9.8356	16.3834	6.7432
GeneID:494143	CHAC2	6.5981	3.9709	9.0301	2.3065	6.0569
GeneID:23198	PSME4	15.0598	21.0694	11.4852	36.5733	17.407
GeneID:57142	RTN4	34.8803	46.0903	45.3379	59.6137	86.4531
GeneID:6233	RPS27A	338.234	197.983	379.813	417.884	175.578
GeneID:4528	MTIF2	18.5849	10.4295	19.4235	24.3467	31.9836
GeneID:55704	CCDC88A	10.2095	10.6327	12.7701	12.6007	12.1542
GeneID:112942	CCDC104	14.9871	9.4975	28.4482	8.8405	22.122
GeneID:87178	PNPT1	7.1424	4.8191	8.4161	8.8031	8.22
GeneID:7444	VRK2	25.8402	9.62	12.5404	18.9077	24.2066
GeneID:55120	FANCL	24.484	21.865	19.6607	35.7979	25.7523
GeneID:64895	PAPOLG	2.3484	2.6581	1.9004	3.0075	2.316
GeneID:9736	USP34	20.2963	10.2475	15.5902	35.921	17.1507
GeneID:7514	XPO1	72.8763	65.8526	67.8622	55.5954	90.7962
GeneID:10575	CCT4	105.349	136.603	134.264	168.008	169.379
GeneID:150684	COMMD1	39.0802	17.2685	12.5005	20.1433	12.5137
GeneID:4190	MDH1	117.172	135.732	59.5159	96.3616	91.9218
GeneID:23177	CEP68	4.6647	10.0503	3.2935	5.3018	4.4572
GeneID:5861	RAB1A	67.3568	37.9815	40.2428	125.79	54.2514
GeneID:54465	ETAA1	8.7459	4.7726	12.9341	9.1566	4.6924
GeneID:116143	WDR92	5.8334	5.0314	4.1712	5.1468	4.8012
GeneID:56902	PNO1	12.7669	14.7707	13.2408	18.5673	18.7568
GeneID:5534	PPP3R1	31.3238	14.0297	25.8749	39.6729	30.8181
GeneID:27247	NFU1	12.961	7.6495	7.8688	23.062	17.0137
GeneID:64395	GMCL1	7.6082	5.9116	8.505	11.3062	9.2765
GeneID:5093	PCBP1	409.606	283.831	175.279	363.285	297.087
GeneID:54980	C2orf42	4.2346	2.0966	2.4775	4.6688	1.9686
GeneID:7072	TIA1	16.6844	17.3946	12.4532	49.7201	16.6914
GeneID:6637	SNRPG	84.8227	65.3889	85.2999	102.588	153.991
GeneID:84908	FAM136A	42.4035	47.5282	58.9303	63.8477	47.8322
GeneID:113419	TEX261	21.2657	9.6313	21.0193	35.6686	34.8739
GeneID:27332	ZNF638	18.9665	17.7162	21.2516	26.3606	19.5039
GeneID:10322	SMYD5	15.9632	29.6284	15.5407	37.5662	17.4637
GeneID:10574	CCT7	159.552	253.49	186.311	271.897	252.01
GeneID:7840	ALMS1	1.9091	6.4841	3.5522	3.3576	2.9157
GeneID:51002	TPRKB	28.369	14.0615	33.1373	22.8486	49.7035
GeneID:10617	STAMBP	9.2297	7.1877	8.2017	11.08	7.3147
GeneID:1716	DGUOK	51.4636	48.9003	31.048	61.7891	42.8146
GeneID:200424	TET3	11.6056	5.0081	5.3374	6.5711	4.7966
GeneID:10797	MTHFD2	79.4514	56.8598	71.3437	146.702	110.259
GeneID:57835	SLC4A5	4.711	2.0768	2.0702	5.0272	2.2602
GeneID:1639	DCTN1	29.0829	52.7004	27.5415	35.1306	23.0845
GeneID:83444	INO80B	16.3366	8.0516	19.6723	10.101	9.4516
GeneID:100532735	NA	24.8716	22.7124	23.9761	21.0581	10.6789
GeneID:23559	WBP1	30.3475	33.7814	26.5616	29.1098	10.932
GeneID:7841	MOGS	36.1723	27.5142	33.2029	52.9157	29.881
GeneID:116540	MRPL53	96.368	25.7265	34.0628	31.5654	43.3972
GeneID:84865	CCDC142	1.9868	2.1407	6.361	3.2273	1.9078
GeneID:64427	NA	15.7659	12.8923	12.0111	16.9578	12.7631
GeneID:84759	PCGF1	19.9673	8.205	16.0662	11.8674	15.1527
GeneID:550	AUP1	73.8244	46.7652	83.4034	102.503	89.0834
GeneID:27429	HTRA2	31.3414	14.6549	28.3805	28.8088	28.6034
GeneID:84695	LOXL3	15.633	11.4495	5.5464	10.8124	5.3103
GeneID:56655	POLE4	33.7325	17.1872	52.031	67.447	30.9659
GeneID:9801	MRPL19	6.5252	4.8335	8.1022	11.293	5.7083
GeneID:6936	C2orf3	4.8556	1.989	6.2015	7.8148	3.1341
GeneID:8802	SUCLG1	43.5088	18.8706	37.1633	58.1751	60.5689
GeneID:56888	KCMF1	11.5126	11.6782	11.1289	17.445	8.1228
GeneID:84173	ELMOD3	3.7806	3.2599	3.0452	4.145	3.9893
GeneID:4144	MAT2A	107.118	119.371	274.061	121.525	162.544
GeneID:2677	GGCX	8.4977	10.0972	20.8456	26.9603	11.5951
GeneID:51255	RNF181	93.021	66.5704	51.0149	113.969	89.8879
GeneID:388969	C2orf68	9.7786	9.1537	16.3562	17.8957	13.8335
GeneID:10713	USP39	23.4783	45.7037	23.7381	39.8438	52.0687
GeneID:90784	NA	4.097	5.9406	4.35	4.8836	4.9779
GeneID:25885	POLR1A	9.7813	14.9674	5.8211	13.2893	15.7245
GeneID:55037	PTCD3	12.8512	15.8947	15.2237	19.6049	12.7216
GeneID:10989	IMMT	40.8528	36.1133	45.1679	56.352	56.8635
GeneID:51318	MRPL35	11.2112	9.9943	13.2931	14.9558	19.1216
GeneID:64795	RMND5A	11.9194	16.269	12.1568	31.6448	12.2479
GeneID:285074	NA	11.1762	22.3872	12.2323	27.7477	11.2676
GeneID:729857	RGPD2	1.5426	5.0721	1.4908	4.2269	4.0854
GeneID:51315	KRCC1	10.5805	2.9976	5.978	5.4879	3.2092
GeneID:22934	RPIA	19.6227	12.6093	8.1551	18.4029	17.1138
GeneID:64969	MRPS5	32.079	24.8627	33.4625	54.0452	40.3929
GeneID:84874	ZNF514	3.4796	4.1258	4.5604	10.3839	5.3071
GeneID:51011	FAHD2A	16.5247	18.0301	13.4354	17.5174	19.7824
GeneID:56910	STARD7	71.4681	73.9226	46.628	88.8284	59.7673
GeneID:55654	TMEM127	13.2236	10.0263	11.1404	15.8914	10.7134
GeneID:9391	CIAO1	18.807	17.9008	35.4207	35.1966	26.4435
GeneID:23020	SNRNP200	60.7226	92.0642	79.2498	87.8733	70.3038
GeneID:23397	NCAPH	11.3541	15.0127	12.5886	6.6364	16.5073
GeneID:55683	KIAA1310	14.0481	11.464	11.6392	21.9097	18.4757
GeneID:81562	LMAN2L	6.6184	11.0356	9.3074	26.2877	9.084
GeneID:200539	ANKRD23	2.1116	3.1835	1.2816	2.1305	3.2247
GeneID:51239	ANKRD39	15.9205	11.0668	6.5868	15.2195	20.0237
GeneID:151313	FAHD2B	9.6103	14.9081	14.8303	6.962	17.2743
GeneID:1329	COX5B	194.299	237.389	130.251	256.685	379.089
GeneID:10120	ACTR1B	40.7722	23.3485	39.5903	45.6554	43.5859
GeneID:23505	TMEM131	20.8206	5.2656	6.3345	19.1182	9.0029
GeneID:3631	INPP4A	12.4162	11.7407	3.2079	5.1679	4.6363
GeneID:493753	COA5	15.341	9.5623	19.6071	30.5365	16.1698
GeneID:25972	UNC50	21.4281	17.6195	26.3312	57.8676	21.6173
GeneID:129531	MITD1	30.6342	12.5194	19.9543	16.1489	15.1483
GeneID:51263	NA	13.4971	10.9517	23.0693	16.7817	26.8522
GeneID:10190	TXNDC9	12.7709	6.2227	13.3012	21.0679	16.4842
GeneID:9669	EIF5B	46.1414	29.5076	28.8898	34.4087	43.0808
GeneID:51455	REV1	9.3975	5.9769	8.9236	17.9994	8.1189
GeneID:9486	CHST10	7.7439	17.5157	4.4491	7.0428	9.6348
GeneID:79031	PDCL3	10.9456	10.8658	8.1145	10.0602	9.7726
GeneID:6160	RPL31	618.416	306.86	585.444	893.957	284.853
GeneID:84804	MFSD9	3.473	3.9802	3.5065	10.8333	3.6914
GeneID:64965	MRPS9	22.5619	38.6013	16.6534	29.8651	27.9406
GeneID:9392	TGFBRAP1	13.516	7.5929	7.6779	11.7542	8.3718
GeneID:79074	C2orf49	15.4795	8.2476	19.6872	26.0236	15.0931
GeneID:653489	RGPD3	2.5455	3.5141	2.4007	6.6074	2.1517
GeneID:285190	RGPD4	2.362	2.332	2.1209	5.3045	2.0632
GeneID:9648	NA	12.595	5.1131	7.1457	18.6868	8.3386
GeneID:5903	RANBP2	16.0383	14.9218	9.486	26.0644	18.7441
GeneID:165055	CCDC138	3.2284	4.626	4.2766	4.7011	7.1587
GeneID:96626	LIMS3	2.208	1.9708	2.8483	5.4222	7.3223
GeneID:100271835	NA	1.7501	1.905	2.115	4.2337	6.1426
GeneID:699	BUB1	29.1836	40.5366	13.7483	14.8349	38.9596
GeneID:10018	BCL2L11	3.8219	4.2389	6.6853	8.0355	4.844
GeneID:64682	ANAPC1	16.3257	15.6842	12.3096	28.4306	18.1082
GeneID:84172	POLR1B	9.8092	13.1744	9.2782	17.8067	10.4509
GeneID:84269	CHCHD5	35.8916	28.2136	13.584	25.2829	33.0026
GeneID:150468	CKAP2L	7.7418	3.8151	9.5451	7.3637	11.8784
GeneID:150472	CBWD2	20.6699	11.062	12.9625	26.018	12.8165
GeneID:375260	NA	17.1076	13.6597	18.5374	25.8969	33.6094
GeneID:118433	NA	11.1289	2.8762	5.2019	6.0394	5.1978
GeneID:11159	RABL2A	8.1895	4.9487	4.9101	5.5796	2.616
GeneID:8886	DDX18	31.6887	22.1204	19.8512	35.0122	28.2804
GeneID:55240	STEAP3	3.1345	12.4949	11.9508	7.2507	11.2562
GeneID:79134	TMEM185B	6.4618	4.0403	12.2272	4.5426	10.1071
GeneID:23332	CLASP1	19.2398	11.0146	5.1025	20.2451	8.604
GeneID:254128	NA	5.6192	2.6141	4.0325	7.8057	8.793
GeneID:84365	MKI67IP	26.2494	16.5136	19.6745	25.4991	30.555
GeneID:7247	TSN	25.7765	25.0077	19.0912	42.0713	41.5388
GeneID:2071	ERCC3	24.3716	25.2216	26.418	31.8891	18.8224
GeneID:55677	IWS1	21.813	32.2183	11.8604	31.6821	20.5837
GeneID:84826	SFT2D3	6.0962	5.9779	5.9045	10.0395	7.6982
GeneID:55339	WDR33	9.9965	9.1829	5.0147	14.4806	8.5723
GeneID:5433	POLR2D	28.5012	34.2577	24.0152	36.9241	39.1258
GeneID:83607	AMMECR1L	7.1501	10.1852	7.2974	13.9682	7.1563
GeneID:79595	SAP130	10.1018	27.4515	7.5173	13.753	13.3485
GeneID:56886	NA	11.0047	13.3492	8.5867	26.6029	14.6193
GeneID:84084	RAB6C	4.0008	4.3973	6.3461	10.7314	5.5507
GeneID:55627	SMPD4	44.2952	36.2638	22.2979	46.8421	39.8916
GeneID:80097	MZT2B	154.8	62.2134	56.9268	132.982	117.807
GeneID:92856	IMP4	76.4173	56.8691	30.6776	60.7719	65.7485
GeneID:130074	FAM168B	39.6131	20.3523	24.4688	53.8177	31.3532
GeneID:55041	PLEKHB2	17.8564	23.3177	15.1966	40.4317	29.4116
GeneID:150786	WTH3DI	2.908	2.8116	4.9332	7.9775	4.5169
GeneID:653784	MZT2A	167.694	57.4705	83.5145	121.896	110.461
GeneID:150776	NA	19.132	19.0316	11.6919	21.7859	15.8546
GeneID:4249	MGAT5	20.8977	7.9056	5.9877	16.3648	7.1597
GeneID:151162	NA	35.079	11.4104	8.8332	29.0497	9.9422
GeneID:905	CCNT2	7.3066	5.6739	4.1501	11.1496	5.856
GeneID:22930	RAB3GAP1	16.8277	11.1483	8.6178	27.0506	17.6334
GeneID:84083	ZRANB3	1.9768	2.3715	2.0704	5.0834	3.3186
GeneID:23518	R3HDM1	17.5538	14.2561	6.3612	15.0486	15.4589
GeneID:23190	UBXN4	41.9619	16.7043	32.1516	57.3016	30.8436
GeneID:1615	DARS	88.5911	34.1464	43.6302	110.592	58.1352
GeneID:79712	GTDC1	5.748	2.5684	1.565	2.7632	2.1642
GeneID:728773	NA	4.1996	1.5962	3.4865	3.3834	3.0253
GeneID:5000	ORC4	5.5065	4.1828	2.9005	8.5873	6.6037
GeneID:26122	EPC2	7.7124	6.7468	8.2019	14.1743	10.6724
GeneID:27249	MMADHC	98.8449	46.4673	53.3053	106.605	146.566
GeneID:55183	RIF1	8.4674	9.2716	8.0458	11.9504	12.2449
GeneID:55660	PRPF40A	21.024	15.1925	14.2512	27.6456	27.9633
GeneID:151188	NA	10.8744	10.5185	7.3894	19.5737	15.2317
GeneID:728066	NA	14.7698	5.7754	9.6371	17.5374	12.0529
GeneID:151525	WDSUB1	4.9257	2.6566	3.3819	9.4003	7.83
GeneID:29994	BAZ2B	5.6626	4.735	3.5702	4.6742	3.1461
GeneID:64844	2023-03-07	36.981	20.1263	14.5925	32.916	33.6301
GeneID:10213	PSMD14	48.5819	53.0384	36.2269	52.9894	85.8702
GeneID:9360	PPIG	40.6019	20.0657	17.7758	31.5686	36.9409
GeneID:6741	SSB	42.0671	40.5505	34.6861	78.3455	111.593
GeneID:29081	METTL5	42.1747	26.2535	33.8669	63.9537	96.9653
GeneID:26003	GORASP2	46.0128	34.1337	24.3931	58.5658	39.1627
GeneID:79828	METTL8	9.157	5.5302	2.9061	4.4483	3.608
GeneID:1781	DYNC1I2	20.8667	15.6645	13.564	30.9841	27.1871
GeneID:8604	SLC25A12	8.746	2.9621	3.6918	4.631	7.3503
GeneID:8520	NA	38.373	26.2688	28.3876	31.71	92.0136
GeneID:254042	METAP1D	3.1145	2.497	2.3891	8.5684	7.1685
GeneID:5163	PDK1	21.2653	7.2719	17.2487	22.9705	5.8468
GeneID:83879	CDCA7	17.7163	27.9945	27.5458	20.0799	21.6279
GeneID:6670	SP3	13.0753	8.1649	9.4101	20.2426	11.1063
GeneID:440926	NA	267.203	311.938	302.875	289.908	656.014
GeneID:1386	ATF2	16.0515	9.0772	9.3877	34.2443	17.923
GeneID:10651	MTX2	20.7632	18.9052	11.6041	24.2872	41.7659
GeneID:220988	HNRNPA3	61.4631	39.4276	29.364	79.2903	77.0862
GeneID:129831	RBM45	5.513	4.3281	2.6106	3.46	6.6041
GeneID:8575	PRKRA	30.609	15.1587	12.2044	35.3203	21.6013
GeneID:57703	CWC22	12.0554	9.1428	8.3443	17.4072	16.0309
GeneID:10477	UBE2E3	15.561	19.0773	10.4802	35.6582	26.4868
GeneID:54431	DNAJC10	14.51	17.5724	13.8855	39.5424	31.2292
GeneID:129401	NUP35	7.2441	15.0349	6.7638	12.3976	11.0816
GeneID:55854	ZC3H15	58.5561	30.5739	31.9125	82.2954	76.5876
GeneID:84128	WDR75	20.8726	23.254	16.22	28.5523	20.2961
GeneID:54529	ASNSD1	21.5121	12.6448	13.9688	34.1133	11.0962
GeneID:94101	ORMDL1	28.2404	12.251	15.9321	34.6199	12.3306
GeneID:5378	PMS1	9.899	8.3414	4.61	13.6928	6.9315
GeneID:26275	HIBCH	14.7496	7.1082	5.9	19.5018	11.1202
GeneID:4664	NAB1	13.9316	5.2792	16.6175	14.6358	6.1048
GeneID:9330	GTF3C3	12.5225	9.1708	10.3336	25.1989	13.3686
GeneID:23451	SF3B1	128.842	96.8361	58.7356	184.583	59.8685
GeneID:80219	COQ10B	10.2194	5.7573	5.7458	16.665	6.253
GeneID:3336	HSPE1	92.5025	153.327	71.8745	276.323	173.755
GeneID:25843	MOBKL3	7.6278	10.187	4.6194	15.9113	7.2757
GeneID:92935	MARS2	7.1989	11.327	4.0899	8.3346	6.4164
GeneID:205327	C2orf69	8.6967	5.0572	4.0124	10.1491	4.0319
GeneID:129450	TYW5	3.3514	2.7549	1.9592	4.7694	1.3266
GeneID:79568	C2orf47	11.7673	10.9668	7.8635	21.9107	9.4736
GeneID:151246	SGOL2	8.3174	3.3482	4.4422	3.6692	7.8031
GeneID:60491	NIF3L1	10.9017	27.0818	13.6214	18.2964	14.4469
GeneID:4999	NA	7.6614	10.7203	7.3545	21.7177	8.3492
GeneID:4709	NDUFB3	61.443	17.6415	17.67	36.4769	56.6124
GeneID:66008	TRAK2	4.394	3.344	4.2313	6.9767	7.6829
GeneID:55437	STRADB	5.7467	6.1357	4.876	16.1963	7.8854
GeneID:65062	TMEM237	1.9737	4.9995	2.948	4.0069	2.1872
GeneID:57679	ALS2	2.8067	7.6544	2.4085	9.3352	5.2938
GeneID:7341	SUMO1	60.3415	34.6967	28.2793	70.5713	32.975
GeneID:51602	NOP58	59.8173	52.2348	49.1419	64.1182	53.1793
GeneID:55759	WDR12	13.8386	22.1388	12.8542	32.684	28.6699
GeneID:10152	ABI2	10.2446	21.3905	7.3582	15.4643	6.5479
GeneID:4719	NDUFS1	19.9063	22.6493	21.6396	59.1902	23.3626
GeneID:1933	EEF1B2	305.895	130.871	102.645	383.225	124.409
GeneID:22868	FASTKD2	6.4841	6.7551	4.7707	8.9663	5.0742
GeneID:1385	CREB1	6.5731	5.2671	2.2288	6.8436	3.8501
GeneID:151194	METTL21A	3.1838	4.0465	2.1072	7.8001	4.3868
GeneID:6120	RPE	11.0431	10.6352	13.6041	26.9926	12.2959
GeneID:151050	C2orf67	3.3689	2.6901	3.3307	6.1718	2.9728
GeneID:10314	LANCL1	12.3253	9.8913	20.0209	27.8639	14.9467
GeneID:79582	SPAG16	4.4182	2.5103	2.8388	4.6118	1.225
GeneID:580	BARD1	7.4083	5.6422	5.0554	2.6109	2.6664
GeneID:471	ATIC	85.8324	110.304	59.3435	125.204	92.5408
GeneID:7520	XRCC5	122.018	198.494	81.1767	103.043	90.1883
GeneID:50485	SMARCAL1	12.4108	8.9939	5.9148	10.7379	9.3092
GeneID:6168	RPL37A	2012.33	815.584	1080.89	2133.5	536.335
GeneID:14	AAMP	41.9882	82.4503	29.5124	82.832	43.271
GeneID:25953	PNKD	7.239	8.5244	7.6387	20.5434	15.4054
GeneID:25953	PNKD	7.239	8.5244	7.6387	20.5434	15.4054
GeneID:58190	CTDSP1	31.1582	13.4716	23.3554	51.4217	33.3249
GeneID:9125	RQCD1	41.6623	41.4483	18.3408	33.002	19.5453
GeneID:7701	ZNF142	6.6141	7.3721	4.8418	5.1152	4.3183
GeneID:617	BCS1L	15.7125	11.9578	14.1114	18.3409	18.9282
GeneID:64320	RNF25	10.6308	11.7422	7.1165	12.3301	7.3973
GeneID:79840	NHEJ1	6.431	9.7418	6.6333	15.5258	6.155
GeneID:27013	CNPPD1	35.5458	24.0091	21.269	32.7501	31.7837
GeneID:79137	FAM134A	24.285	13.109	20.6799	34.0307	10.8052
GeneID:55139	ANKZF1	34.8528	18.783	36.5014	46.8515	14.5639
GeneID:8576	NA	11.0514	7.8484	7.0317	11.9111	6.9693
GeneID:23549	DNPEP	21.4172	24.2845	16.4145	35.2929	23.0268
GeneID:114790	STK11IP	8.5236	9.6502	4.129	7.3692	5.2264
GeneID:10056	FARSB	36.1172	24.434	23.9115	36.4939	44.274
GeneID:65080	MRPL44	23.9038	20.0618	11.176	28.526	10.8174
GeneID:8452	CUL3	15.5652	11.3062	6.6521	16.148	9.2008
GeneID:56947	MFF	27.2891	16.0663	33.0595	46.2827	12.0688
GeneID:3267	AGFG1	12.2406	8.7685	7.2777	17.07	5.7546
GeneID:9320	TRIP12	38.2352	17.5054	15.8512	37.6546	20.8588
GeneID:51719	CAB39	29.8284	10.5126	16.4666	18.752	28.2385
GeneID:5707	NA	25.9439	71.8538	21.2047	40.3574	43.498
GeneID:4691	NCL	389.255	501.895	278.89	418.986	222.527
GeneID:64708	COPS7B	22.3186	32.3866	12.2975	31.2739	19.772
GeneID:129563	DIS3L2	6.2537	6.9453	4.6884	7.0205	5.2921
GeneID:200765	TIGD1	2.2408	3.7825	6.7564	4.219	4.417
GeneID:9470	EIF4E2	53.8409	63.398	35.8241	55.71	31.5929
GeneID:26058	GIGYF2	10.9404	12.2359	8.8423	16.8914	8.5756
GeneID:55054	ATG16L1	7.1588	11.1228	5.6425	14.0058	4.7202
GeneID:55230	USP40	5.291	3.0601	3.8019	11.9023	4.6378
GeneID:55355	HJURP	16.4832	19.3806	21.6258	10.2168	15.9073
GeneID:10920	COPS8	11.6212	7.7957	8.7222	16.9896	6.4561
GeneID:9208	LRRFIP1	28.2287	7.5073	17.4216	22.7164	8.2048
GeneID:140739	UBE2F	5.5022	12.6535	5.8265	14.3813	18.1989
GeneID:80895	ILKAP	14.5239	12.9232	8.2983	13.5199	12.1447
GeneID:643387	NA	2.8287	6.1992	3.0075	3.0534	3.2424
GeneID:26146	TRAF3IP1	2.3448	3.7102	3.952	4.1535	2.0601
GeneID:51665	ASB1	9.104	8.1112	7.6188	18.4516	6.8948
GeneID:4705	NDUFA10	23.8004	13.9524	14.0268	33.0158	12.5624
GeneID:150678	MYEOV2	49.2614	44.4893	32.7533	40.0765	26.7563
GeneID:11132	CAPN10	9.7741	14.1821	5.5185	11.8871	6.4781
GeneID:5510	PPP1R7	60.9906	35.605	23.0934	35.0969	33.2966
GeneID:4735	2023-09-02	106.738	96.5912	58.1484	216.898	62.2902
GeneID:10494	STK25	38.3402	72.6568	28.2218	102.239	37.7905
GeneID:51078	THAP4	19.628	33.988	17.6152	38.4463	19.2512
GeneID:1841	DTYMK	26.757	36.7795	27.7146	28.9305	32.2609
GeneID:84289	ING5	6.4599	10.2564	4.5057	11.5122	4.1801
GeneID:51095	TRNT1	11.3707	7.3805	9.9448	9.6129	12.8303
GeneID:51185	CRBN	13.9325	6.9656	14.2267	13.7968	18.4667
GeneID:6419	NA	5.9689	8.3741	2.6543	3.9544	7.1838
GeneID:25917	THUMPD3	12.2483	11.0055	15.0948	10.5885	24.9861
GeneID:440944	NA	13.5715	5.5497	10.9811	12.7015	12.6205
GeneID:55209	SETD5	31.0979	47.7537	29.931	31.5848	29.4684
GeneID:64419	MTMR14	31.2496	26.5553	13.1453	14.3707	25.0582
GeneID:7862	BRPF1	8.6634	9.8043	13.38	5.299	12.4303
GeneID:4968	OGG1	5.7074	10.4444	7.9339	9.2846	10.2666
GeneID:10474	TADA3	23.5611	22.0124	19.5723	21.1216	55.6096
GeneID:100526693	ARPC4-TTLL3	39.2784	12.5107	16.3124	13.6799	44.2414
GeneID:285367	RPUSD3	17.917	30.0269	19.1773	15.0945	35.6432
GeneID:84522	JAGN1	38.3041	19.0126	41.0895	45.0471	39.29
GeneID:55831	TMEM111	34.3718	21.2724	23.1967	31.6954	58.0959
GeneID:401052	LOC401052	1.57	2.0258	4.578	1.5511	2.9379
GeneID:55845	BRK1	131.324	112.914	158.717	151.167	165.749
GeneID:9797	TATDN2	17.0351	11.8074	17.5663	16.1742	18.3778
GeneID:6396	SEC13	55.724	64.0494	45.6982	124.269	79.4575
GeneID:10533	ATG7	11.1902	7.8467	9.9236	7.4567	7.9371
GeneID:9686	VGLL4	17.496	11.5374	12.6286	13.0139	5.3838
GeneID:132001	C3orf31	10.5669	6.796	11.4641	6.6113	11.1946
GeneID:80746	TSEN2	2.7776	4.3117	8.1334	2.6708	6.7409
GeneID:23609	MKRN2	30.407	8.0564	18.3938	21.1229	26.7428
GeneID:5894	RAF1	48.9289	42.6607	31.4698	32.6099	35.4137
GeneID:6161	RPL32	588.856	220.208	488.262	315.56	452.95
GeneID:23225	NUP210	74.3799	29.8558	43.538	35.8268	78.3163
GeneID:131474	CHCHD4	6.8045	9.6601	17.9664	13.7397	22.5832
GeneID:79188	TMEM43	20.2818	14.2656	28.121	29.9977	22.389
GeneID:7508	XPC	23.6905	15.8834	14.7161	13.7959	26.809
GeneID:27258	LSM3	76.6638	37.5557	73.7658	35.5016	138.172
GeneID:51244	C3orf19	11.46	4.8452	7.6081	6.5251	9.6683
GeneID:7182	NR2C2	10.0623	10.6619	17.1692	13.9713	15.8425
GeneID:64432	MRPS25	16.0518	14.4584	26.4296	19.6717	28.9611
GeneID:64145	ZFYVE20	5.8502	5.5018	11.0216	6.3727	7.9251
GeneID:131965	METTL6	4.7668	3.762	7.3356	5.8262	6.4273
GeneID:85403	EAF1	11.734	9.9698	11.6341	12.23	12.0336
GeneID:26061	HACL1	12.743	20.9612	12.9126	10.444	17.2121
GeneID:23243	ANKRD28	13.3861	9.2667	12.629	9.7207	12.1191
GeneID:285381	DPH3	5.3685	6.646	5.4131	10.3801	12.882
GeneID:92106	OXNAD1	3.2499	4.9131	4.0541	3.0409	8.5561
GeneID:9779	TBC1D5	12.0152	3.9571	6.5635	9.2271	8.305
GeneID:5868	RAB5A	21.0762	15.5839	22.2686	18.8431	25.4038
GeneID:28512	NKIRAS1	7.1221	2.1522	2.8275	4.6741	2.6336
GeneID:6138	RPL15	771.625	342.337	495.75	582.612	438.662
GeneID:7155	TOP2B	41.5854	34.8208	22.7898	26.6295	54.9945
GeneID:152100	CMC1	22.0691	12.3284	18.7029	21.6913	36.1399
GeneID:201595	STT3B	66.0759	37.8967	41.2408	65.7931	43.1889
GeneID:54918	CMTM6	22.3048	15.0067	11.2631	22.4109	15.6385
GeneID:51143	DYNC1LI1	11.9426	14.2211	8.8454	12.9454	26.8932
GeneID:25904	CNOT10	15.1973	15.3301	20.9493	9.3952	33.1889
GeneID:2720	GLB1	15.8452	22.5655	33.3482	61.617	41.0046
GeneID:7342	UBP1	23.8258	20.9929	19.2602	24.3925	28.0128
GeneID:23122	CLASP2	5.6773	5.7014	5.1143	5.2469	12.3955
GeneID:10015	NA	23.9908	15.5346	25.4904	16.6983	39.3978
GeneID:4292	MLH1	24.92	21.0836	11.3388	13.6065	38.956
GeneID:9209	LRRFIP2	6.9102	4.4507	6.9574	8.7242	11.8595
GeneID:2803	GOLGA4	15.4099	10.2388	17.9218	29.7954	10.9559
GeneID:9943	OXSR1	30.507	18.9308	26.225	21.3928	23.7978
GeneID:9941	EXOG	5.0576	2.7316	3.2359	2.3056	4.9656
GeneID:57599	WDR48	13.4086	15.0558	14.1814	19.3925	17.7595
GeneID:64689	GORASP1	9.5141	13.244	11.8316	9.9069	33.8804
GeneID:54977	SLC25A38	18.3783	19.6245	16.9064	16.0022	19.203
GeneID:3921	RPSA	561.388	501.146	398.853	286.172	363.379
GeneID:10289	EIF1B	49.9581	49.2996	32.9872	73.7428	80.0683
GeneID:9045	RPL14	392.879	237.115	407.741	400.993	423.7
GeneID:285268	ZNF621	5.5518	3.7453	5.5564	6.8246	6.1095
GeneID:1499	CTNNB1	56.2489	129.65	64.1329	129.375	51.6527
GeneID:22906	TRAK1	16.0057	9.3987	6.4525	12.9253	8.2051
GeneID:9117	SEC22C	7.1893	5.9011	6.2149	7.2827	11.7392
GeneID:51188	SS18L2	58.3874	40.6192	19.9477	20.4054	43.969
GeneID:4820	NKTR	34.3701	17.1424	18.22	27.4094	22.3417
GeneID:353274	ZNF445	4.051	4.8208	4.2688	4.3439	5.0656
GeneID:10168	ZNF197	4.5909	2.8255	3.5721	1.7533	5.3997
GeneID:57456	KIAA1143	8.3482	10.4917	13.9965	9.0069	12.9681
GeneID:56992	KIF15	7.1116	6.6635	8.9036	3.9105	7.9793
GeneID:51304	ZDHHC3	3.4907	5.9192	4.7961	5.2425	7.452
GeneID:23016	EXOSC7	31.988	51.1821	24.154	30.7519	39.9264
GeneID:23395	LARS2	9.2854	21.0459	8.4488	11.0207	14.6392
GeneID:22908	SACM1L	10.8446	14.8525	8.684	12.1197	22.1568
GeneID:79443	FYCO1	3.6423	3.0776	5.1151	3.4401	3.6439
GeneID:151903	CCDC12	44.8795	27.1481	17.8979	23.8878	52.3049
GeneID:29072	SETD2	17.0205	11.2569	13.6438	14.1539	15.9178
GeneID:64147	KIF9	1.0933	1.0512	1.8782	1.1011	3.4287
GeneID:23276	KLHL18	7.2622	8.6763	4.1377	5.2833	12.4959
GeneID:25930	PTPN23	16.3639	23.5359	14.9029	15.1258	25.3998
GeneID:22937	SCAP	18.2375	45.1574	18.0159	39.5842	38.4809
GeneID:54859	C3orf75	18.2114	30.0195	19.83	11.2051	32.2951
GeneID:6599	SMARCC1	48.0994	83.0986	48.1672	33.4684	56.5988
GeneID:22907	DHX30	19.6373	38.7589	27.7373	20.1294	41.4849
GeneID:4134	MAP4	42.5612	46.1358	35.8759	38.905	44.4204
GeneID:993	CDC25A	7.0793	23.5911	10.1089	5.9745	14.964
GeneID:10201	NME6	11.529	7.3094	12.6329	8.7251	12.8991
GeneID:79714	CCDC51	12.0318	16.106	15.3874	7.6423	8.8059
GeneID:51372	CCDC72	111.329	84.9713	61.3511	56.0876	63.7646
GeneID:84126	ATRIP	5.1735	9.7013	9.8837	2.926	6.2007
GeneID:51246	SHISA5	63.5226	99.1174	56.597	46.6662	44.9482
GeneID:7384	UQCRC1	92.6378	175.397	132.423	199.757	112.743
GeneID:51517	NCKIPSD	23.6142	18.6983	29.2939	14.089	10.8361
GeneID:51447	IP6K2	19.9043	26.3732	25.4448	29.1927	15.9958
GeneID:5576	PRKAR2A	8.3443	6.5541	10.7968	12.1417	18.2635
GeneID:10425	ARIH2	17.7626	34.3708	23.6429	19.7704	22.7102
GeneID:11180	WDR6	95.191	92.9732	64.492	56.0178	38.2771
GeneID:55152	DALRD3	49.3522	46.5167	37.8682	27.6211	21.963
GeneID:25915	NDUFAF3	25.7194	9.3487	18.7224	14.1908	19.0221
GeneID:25915	NDUFAF3	25.7194	9.3487	18.7224	14.1908	19.0221
GeneID:3615	IMPDH2	151.41	260.971	338.22	134.269	152.996
GeneID:54870	QRICH1	30.4205	34.7435	19.4397	21.0658	19.4677
GeneID:5859	QARS	135.629	137.444	129.943	156.246	115.026
GeneID:10869	USP19	17.0332	17.3243	15.0388	12.9768	17.2348
GeneID:64925	CCDC71	16.1223	18.9148	10.8334	6.9636	11.0069
GeneID:387	RHOA	396.826	211.787	260.161	218.604	203.246
GeneID:6988	TCTA	13.6898	5.3387	10.7005	4.8548	7.4871
GeneID:84276	NICN1	12.7358	6.0483	7.2267	8.2686	6.7051
GeneID:327	APEH	35.7793	94.084	47.4545	46.234	54.1904
GeneID:63891	RNF123	7.0898	12.3294	13.3035	17.586	13.1393
GeneID:386724	AMIGO3	3.7947	4.6999	2.3269	1.4656	3.5897
GeneID:9807	IP6K1	8.3624	12.2003	14.1435	12.8852	10.2284
GeneID:10293	TRAIP	6.3245	10.657	6.5484	3.5014	7.9951
GeneID:84315	MON1A	2.7818	4.4431	2.0765	3.7139	6.503
GeneID:10180	RBM6	40.7735	31.3558	17.9608	47.6464	19.1035
GeneID:10181	NA	46.0394	34.3642	23.7714	39.1766	20.6815
GeneID:132228	C3orf45	3.9349	7.5056	13.0067	5.7335	5.8056
GeneID:7866	IFRD2	19.1067	29.5558	50.4643	23.2759	27.5396
GeneID:11334	TUSC2	18.7758	22.7197	11.878	15.6193	13.8208
GeneID:10641	NPRL2	18.4873	12.743	12.1531	10.8501	11.4275
GeneID:11068	CYB561D2	16.5308	9.2853	11.7199	4.9489	9.2206
GeneID:11070	TMEM115	10.5079	13.6509	14.5248	19.5238	12.6039
GeneID:51161	C3orf18	1.8835	4.8714	2.1488	1.6552	1.7507
GeneID:51409	HEMK1	5.5915	2.2788	3.5096	3.4315	4.9612
GeneID:7867	MAPKAPK3	10.8446	36.5345	26.6206	15.8017	25.3694
GeneID:7873	MANF	91.39	63.4287	45.0567	56.2774	32.8839
GeneID:29890	RBM15B	15.624	29.8433	15.3925	10.6578	9.1533
GeneID:9730	VPRBP	10.8919	14.0063	13.2414	8.766	7.58
GeneID:23132	RAD54L2	3.8279	7.631	4.0767	3.8781	2.6272
GeneID:51368	NA	22.8074	6.325	20.2738	16.3178	14.7718
GeneID:9136	RRP9	19.0273	31.8091	13.6443	14.1392	25.9705
GeneID:57060	PCBP4	5.553	9.5845	8.3358	13.0296	3.4944
GeneID:6159	RPL29	1348.04	706.55	1229.76	1089.95	522.393
GeneID:1849	DUSP7	5.9647	7.1501	12.0042	3.0922	5.1186
GeneID:25886	POC1A	8.1439	19.1321	13.0897	5.5803	10.8049
GeneID:211	ALAS1	33.7042	28.2767	26.0923	17.2085	16.9305
GeneID:11344	TWF2	43.0899	43.7873	26.587	65.903	40.6946
GeneID:80335	WDR82	33.6392	33.2387	31.3382	41.5215	24.7198
GeneID:8314	BAP1	29.8839	34.0488	27.4597	25.5634	22.323
GeneID:51533	PHF7	2.6551	3.2019	2.8125	3.3883	5.6099
GeneID:11188	NISCH	20.2866	29.1724	13.0687	16.3535	19.2905
GeneID:440957	C3orf78	30.1986	34.9963	28.7245	17.6992	27.2237
GeneID:55193	PBRM1	9.0612	8.2889	8.2014	6.9553	6.7529
GeneID:26354	GNL3	66.2453	55.0988	88.7039	69.7097	36.6975
GeneID:55830	GLT8D1	31.2732	11.6177	24.0895	40.8646	14.0949
GeneID:28972	SPCS1	139.186	41.7429	66.4782	64.8144	62.9266
GeneID:6787	NEK4	5.4176	6.7479	6.268	9.2229	5.2117
GeneID:100526772	TMEM110-MUSTN1	4.2538	7.3679	2.5123	4.5706	4.3854
GeneID:375346	TMEM110	5.1939	10.32	3.6619	6.4157	5.8376
GeneID:51460	SFMBT1	4.2408	4.3902	4.2949	2.3745	1.8723
GeneID:91869	RFT1	6.6131	5.0648	8.0088	4.8767	3.6195
GeneID:7086	TKT	103.947	395.105	256.526	165.865	123.58
GeneID:55802	DCP1A	9.1948	4.3356	9.0557	13.9418	5.1491
GeneID:93973	ACTR8	8.8949	6.4259	10.7663	9.2748	4.4787
GeneID:58515	SELK	32.72	14.3307	29.8426	29.8031	13.9415
GeneID:285331	CCDC66	2.908	2.961	5.7438	2.8114	5.0428
GeneID:23272	C3orf63	14.6253	4.4329	13.3387	7.6259	7.8476
GeneID:201626	PDE12	8.4635	4.2713	6.8055	6.163	7.273
GeneID:378	ARF4	79.7112	39.5676	70.3476	121.976	51.6613
GeneID:201627	FAM116A	4.1679	2.1004	6.6276	4.4072	3.9556
GeneID:7871	SLMAP	9.4143	7.3722	15.3942	13.9956	8.1675
GeneID:57406	ABHD6	5.3288	2.7304	4.9844	7.1161	2.5674
GeneID:11102	RPP14	7.3511	7.08	9.7364	8.9026	5.7768
GeneID:5162	NA	33.5888	69.0091	39.0083	92.6073	25.8875
GeneID:80145	THOC7	62.4408	17.6195	36.2002	31.5666	42.7669
GeneID:6314	ATXN7	5.6143	2.9846	5.1133	6.6591	2.2765
GeneID:9861	PSMD6	55.9452	52.6542	32.3967	42.5267	56.9907
GeneID:115286	NA	7.7529	7.0758	6.0105	8.9297	2.8959
GeneID:8801	SUCLG2	17.8638	9.6295	16.194	17.8864	11.4686
GeneID:285203	C3orf64	1.3944	3.0836	2.7454	1.9292	2.6837
GeneID:9039	UBA3	26.2643	15.8669	12.3106	17.6468	14.6072
GeneID:23429	RYBP	13.3197	10.7592	6.9601	25.2527	14.8513
GeneID:55164	SHQ1	12.5987	7.5054	5.1116	4.5098	6.2153
GeneID:151987	PPP4R2	20.9757	16.2755	13.6149	29.3897	13.0156
GeneID:692099	NA	2.3445	5.6395	5.4568	2.8847	3.1924
GeneID:25978	CHMP2B	14.4031	9.2656	8.9048	9.4108	7.8786
GeneID:8545	CGGBP1	28.8111	10.133	14.7864	20.5528	19.3223
GeneID:84864	MINA	7.1802	2.1009	5.146	8.0244	5.0439
GeneID:84319	C3orf26	18.6457	19.7266	29.8533	12.2811	26.9297
GeneID:84319	C3orf26	18.6457	19.7266	29.8533	12.2811	26.9297
GeneID:56954	NIT2	29.1325	10.316	26.8392	16.8174	13.1005
GeneID:9868	TOMM70A	24.9518	13.7494	22.2127	29.6877	24.2345
GeneID:348801	LNP1	1.496	4.4436	1.7302	4.5132	2.8701
GeneID:10342	TFG	49.1282	30.3185	45.7218	38.0241	40.9908
GeneID:54931	RG9MTD1	23.3899	18.0293	27.4617	15.9626	25.5289
GeneID:57092	PCNP	53.701	24.502	48.5357	59.2424	61.8343
GeneID:27107	ZBTB11	9.179	3.4898	7.8935	7.4179	10.5946
GeneID:100009676	NA	2.6107	1.6821	2.397	1.6829	5.6813
GeneID:6152	RPL24	418.519	179.369	380.162	278.353	180.944
GeneID:79598	CEP97	2.7885	2.0105	3.7847	1.2525	1.7499
GeneID:57650	KIAA1524	5.8173	6.3283	7.1244	2.6138	7.6625
GeneID:55347	ABHD10	15.081	5.5823	8.6419	12.5742	6.04
GeneID:64422	ATG3	36.0638	21.121	26.516	16.3546	36.0107
GeneID:55032	SLC35A5	9.949	6.2518	8.8808	7.9217	3.649
GeneID:100630917	NA	8.2147	11.7108	27.553	14.88	10.1345
GeneID:29083	GTPBP8	8.434	8.3436	8.228	6.8764	10.8162
GeneID:25871	C3orf17	14.4087	8.6531	13.9056	10.1193	7.272
GeneID:80218	NAA50	20.6746	21.654	40.2107	27.7848	24.9176
GeneID:523	ATP6V1A	11.7746	14.4954	22.2291	16.6744	11.0094
GeneID:79691	QTRTD1	7.9642	10.5449	8.3934	6.8124	4.9386
GeneID:8702	B4GALT4	8.3976	18.1883	4.6103	16.9488	5.0979
GeneID:55254	TMEM39A	15.4923	10.8843	9.959	21.1959	7.0093
GeneID:56983	POGLUT1	9.3988	4.3165	6.4846	8.331	4.6758
GeneID:51300	TIMMDC1	26.6554	34.0369	23.1319	25.7892	36.2948
GeneID:2932	GSK3B	12.5763	7.4685	10.2268	8.0565	3.8984
GeneID:4710	NDUFB4	55.3366	48.1531	44.9898	27.491	32.9059
GeneID:285282	RABL3	7.5453	3.8255	3.9623	5.0512	4.857
GeneID:10721	POLQ	4.2996	3.6593	3.7629	1.6243	2.6571
GeneID:2804	GOLGB1	18.8646	8.6462	13.3824	16.5488	5.7189
GeneID:9657	IQCB1	20.1626	9.8793	12.0506	10.8801	10.0073
GeneID:131076	CCDC58	22.5561	10.4171	23.3015	35.425	21.0958
GeneID:54554	WDR5B	1.9643	1.4128	2.5023	1.9227	2.5226
GeneID:3836	NA	9.2655	5.8868	10.2404	8.516	8.6409
GeneID:79663	HSPBAP1	2.3844	4.4843	4.8149	2.169	1.6933
GeneID:10954	NA	15.8867	15.654	14.0502	47.5607	12.638
GeneID:26984	SEC22A	5.4238	2.2077	4.0358	2.9997	2.584
GeneID:64770	CCDC14	15.3916	13.4007	17.3	10.5721	16.8928
GeneID:7372	NA	6.5254	9.4106	10.2621	12.4513	4.8558
GeneID:114885	OSBPL11	5.4456	6.6489	4.7909	5.6421	2.1597
GeneID:54946	SLC41A3	10.5776	12.7151	25.7158	22.7546	12.0049
GeneID:79364	ZXDC	3.4332	4.3307	6.5332	7.2239	2.5448
GeneID:131601	TPRA1	13.6295	8.6723	16.2321	9.5122	8.0809
GeneID:29927	SEC61A1	115.022	77.9476	80.3238	117.197	77.4929
GeneID:8607	RUVBL1	33.4565	85.4527	52.3611	27.2325	58.6652
GeneID:60678	EEFSEC	13.4536	7.9011	11.7394	17.9045	10.5062
GeneID:6184	RPN1	96.4128	101.233	105.846	132.785	94.494
GeneID:7879	RAB7A	104.615	80.4115	84.9289	102.251	95.883
GeneID:339122	RAB43	8.5859	7.7129	4.8514	19.0804	8.2184
GeneID:100534599	ISY1-RAB43	13.5857	9.0069	8.6166	19.5834	10.7868
GeneID:57461	ISY1	13.2278	4.2876	8.6911	4.5577	7.3299
GeneID:7555	CNBP	158.758	125.482	171.689	172.825	118.846
GeneID:22820	COPG	74.7334	48.4109	43.0642	62.7032	49.2281
GeneID:56941	C3orf37	33.3143	29.1111	27.4502	20.3659	22.8618
GeneID:8971	H1FX	69.8717	107.926	97.3547	53.3177	72.347
GeneID:132241	NA	4.2615	3.2913	5.1939	4.7643	2.2496
GeneID:8930	MBD4	27.9122	11.1912	20.3049	8.1838	19.3319
GeneID:55764	IFT122	6.4447	11.2427	8.6914	3.8295	6.2077
GeneID:30849	PIK3R4	5.4233	10.6515	7.809	6.8362	6.161
GeneID:27032	ATP2C1	16.4411	14.3243	18.5694	12.2175	6.7941
GeneID:28990	ASTE1	4.1722	3.3829	4.4859	3.5682	3.3726
GeneID:11222	MRPL3	47.4046	46.1929	51.8686	41.205	53.345
GeneID:23317	DNAJC13	11.1652	7.0328	8.526	6.2096	3.6335
GeneID:79876	UBA5	17.5404	6.9865	12.0633	12.4997	12.8808
GeneID:27031	NPHP3	3.4351	2.018	3.9825	4.0389	1.8866
GeneID:55573	CDV3	121.719	33.1534	54.9167	58.9259	39.1179
GeneID:11073	TOPBP1	19.9996	8.6865	29.6294	9.3125	15.6427
GeneID:58477	SRPRB	21.2441	11.753	19.9482	23.23	15.7623
GeneID:6259	RYK	4.6764	14.4596	17.4495	15.7079	4.6586
GeneID:25847	ANAPC13	27.1526	11.389	19.2853	25.669	26.2573
GeneID:80254	CEP63	5.4254	2.5382	3.2906	4.5614	2.2295
GeneID:55167	MSL2	12.2012	7.6594	7.6807	7.4242	5.8471
GeneID:5096	PCCB	35.2916	41.3468	14.6136	33.6241	43.2265
GeneID:10274	STAG1	7.6761	3.4991	8.7929	6.539	3.9758
GeneID:4690	NCK1	11.7783	7.5971	17.5947	10.9786	9.2056
GeneID:51163	DBR1	7.7262	5.389	7.6722	4.4146	5.2693
GeneID:25852	ARMC8	6.2243	6.9125	4.1736	6.3451	4.5825
GeneID:56945	MRPS22	27.0818	20.0516	33.4473	32.7181	59.9994
GeneID:9276	NA	55.1027	41.4383	37.5303	57.8803	51.5852
GeneID:5922	RASA2	2.8751	3.4755	3.0983	3.2205	3.111
GeneID:9616	RNF7	27.9057	23.8231	19.8985	31.196	25.6851
GeneID:483	ATP1B3	49.6214	74.1514	72.7629	48.1245	81.9716
GeneID:7029	TFDP2	6.0764	8.9937	3.8201	4.4646	7.943
GeneID:256356	NA	1.7195	1.0586	3.0906	1.8491	2.1066
GeneID:545	ATR	5.0712	3.8578	4.174	2.9624	5.4183
GeneID:23350	U2SURP	24.6943	14.4982	22.3544	24.5074	24.9999
GeneID:205428	C3orf58	7.0128	5.468	5.2962	5.1164	2.7292
GeneID:5359	PLSCR1	10.9314	8.7887	31.2779	12.0418	27.0661
GeneID:2992	GYG1	10.3385	15.6011	14.6013	18.4892	15.7598
GeneID:6596	HLTF	13.0662	9.241	25.8428	9.1188	16.1308
GeneID:51122	COMMD2	7.6821	6.5833	11.1866	7.4046	8.5577
GeneID:11342	RNF13	10.4646	6.3626	10.5786	18.3664	5.0019
GeneID:653659	TMEM183B	29.6037	50.8562	37.954	26.5395	57.249
GeneID:9819	TSC22D2	5.9982	6.5074	6.6696	5.7484	10.0811
GeneID:27230	SERP1	107.622	31.5829	58.4459	61.5501	94.3022
GeneID:83939	EIF2A	54.1526	15.5787	58.8676	53.7176	35.3895
GeneID:51714	SELT	21.7066	6.6469	8.1281	9.9186	12.6879
GeneID:5912	RAP2B	9.6861	9.6786	6.325	10.3165	13.0463
GeneID:170506	DHX36	12.6193	19.894	18.8276	15.9375	15.4911
GeneID:9197	SLC33A1	12.61	4.534	12.6657	14.244	10.9699
GeneID:8833	GMPS	35.5125	45.0077	65.5107	32.3229	69.3258
GeneID:6747	SSR3	75.959	25.3914	39.0707	46.6786	59.3717
GeneID:647033	NA	29.727	24.0234	44.5535	21.8495	55.5576
GeneID:51319	RSRC1	9.5705	5.3309	10.0203	6.5055	12.3952
GeneID:85476	GFM1	14.5537	12.2581	17.2039	11.0855	20.9926
GeneID:57560	IFT80	4.9358	3.2934	8.4957	4.7936	5.1219
GeneID:3840	KPNA4	8.9666	7.7659	13.3276	9.2897	9.8031
GeneID:51068	NMD3	26.3065	11.7464	30.9423	25.7521	32.9573
GeneID:11235	PDCD10	36.6571	16.3885	44.3339	24.3818	51.3833
GeneID:27333	GOLIM4	9.0625	13.5201	15.6348	26.5592	19.3834
GeneID:55892	MYNN	7.4831	3.8085	6.2777	4.5628	4.7358
GeneID:79718	TBL1XR1	14.9423	5.9817	10.2239	9.2977	8.4723
GeneID:51193	ZNF639	15.3624	5.8829	14.6515	8.326	11.9076
GeneID:86	ACTL6A	24.303	33.1927	42.1135	18.6129	48.1617
GeneID:57129	MRPL47	22.2739	24.7528	28.8855	25.1024	40.6895
GeneID:8087	FXR1	19.5943	20.1089	26.1269	20.4483	14.1658
GeneID:131118	NA	4.37	3.6819	5.6806	5.1232	7.5457
GeneID:54165	DCUN1D1	10.1208	4.0457	8.0446	8.0374	9.6363
GeneID:56922	MCCC1	28.4143	9.4853	13.4935	9.482	11.8513
GeneID:54800	KLHL24	3.0939	2.4299	6.9899	5.7129	3.1358
GeneID:55689	YEATS2	16.1712	20.2851	18.9232	19.1305	8.0857
GeneID:55486	PARL	27.8819	26.1164	28.8949	21.527	24.5096
GeneID:8893	EIF2B5	22.5283	20.2297	26.4165	20.6357	27.4056
GeneID:1857	DVL3	16.3756	22.9079	32.4655	28.1984	27.4274
GeneID:1173	AP2M1	111.501	268.003	250.702	85.7294	260.753
GeneID:55324	ABCF3	18.6664	21.4551	21.3392	15.132	18.7365
GeneID:10195	ALG3	19.8812	25.8994	44.7267	26.9843	34.4319
GeneID:9718	ECE2	2.2611	3.602	7.3465	3.3136	4.0104
GeneID:9718	ECE2	2.2611	3.602	7.3465	3.3136	4.0104
GeneID:5708	PSMD2	39.7119	100.561	88.4909	43.9358	81.8145
GeneID:1981	EIF4G1	65.8892	119.841	91.929	72.9032	89.6767
GeneID:131408	FAM131A	1.6627	6.4187	4.9019	4.5628	3.8793
GeneID:5437	POLR2H	61.0849	82.1898	150.31	59.1796	66.8711
GeneID:64110	MAGEF1	19.7086	32.3835	45.4971	39.3322	19.0922
GeneID:23355	VPS8	5.8343	7.174	4.8125	6.2119	6.7747
GeneID:90407	TMEM41A	12.3433	5.7006	20.901	15.9393	18.4364
GeneID:59343	SENP2	12.5757	12.3999	22.6415	11.3611	14.2721
GeneID:6434	TRA2B	51.4105	44.0598	38.1967	24.8036	55.9725
GeneID:55171	TBCCD1	3.9194	3.0769	4.5458	4.0047	6.1874
GeneID:51726	DNAJB11	39.8142	34.0383	45.1294	53.3798	42.9443
GeneID:1974	EIF4A2	151.359	143.23	311.466	318.227	104.949
GeneID:4976	OPA1	16.1335	16.5881	15.1965	13.3732	20.5817
GeneID:55341	LSG1	15.0214	17.4307	19.7869	7.1085	16.1275
GeneID:152002	C3orf21	3.4136	12.498	10.3165	11.2775	13.4693
GeneID:23527	ACAP2	12.4146	3.3633	7.4856	4.941	12.3085
GeneID:727956	NA	10.017	11.6302	16.499	15.9859	17.7169
GeneID:10188	TNK2	13.9391	9.4992	10.9981	4.7411	5.7999
GeneID:255812	NA	13.7207	9.4773	21.4865	18.4694	21.724
GeneID:7037	TFRC	162.844	55.5008	117.81	197.261	112.626
GeneID:5130	PCYT1A	21.9536	9.6585	9.9288	13.2322	20.1325
GeneID:26043	UBXN7	17.9594	8.6332	12.8603	10.286	7.5153
GeneID:348793	WDR53	5.7816	7.0252	12.1253	4.2619	7.3538
GeneID:200933	FBXO45	6.3385	4.8628	12.4534	5.5466	12.6515
GeneID:5062	PAK2	22.7773	8.8178	22.2203	20.0466	22.1499
GeneID:205564	SENP5	8.3393	5.2508	11.4818	8.9492	8.8779
GeneID:22916	NCBP2	74.7728	42.8702	55.2535	116.78	43.1884
GeneID:152217	NA	18.7639	15.7326	25.5397	28.937	22.7915
GeneID:100507057	NA	6.7936	2.8038	11.1597	5.1298	5.2332
GeneID:1739	DLG1	12.9257	7.7569	12.221	15.7681	13.2649
GeneID:220729	NA	11.0053	8.7441	23.2354	23.5588	14.9853
GeneID:84859	LRCH3	10.9467	11.309	8.9971	7.2887	7.2672
GeneID:6165	RPL35A	1268.45	573.482	1676.93	939.226	857.274
GeneID:79963	NA	3.9916	4.3601	3.227	5.1803	3.0606
GeneID:170960	ZNF721	6.455	7.6914	4.5924	5.5468	5.169
GeneID:54872	PIGG	10.4083	8.1655	8.546	13.042	10.0534
GeneID:521	ATP5I	330.151	411.795	147.44	227.62	450.628
GeneID:10336	PCGF3	13.4623	13.7258	9.1693	22.8256	12.7152
GeneID:100129917	NA	2.9796	3.8578	3.2944	5.122	5.4482
GeneID:2580	GAK	28.3846	19.1042	9.4444	13.6291	18.8699
GeneID:1487	CTBP1	77.0705	48.3389	39.4861	55.1974	48.8899
GeneID:92070	NA	6.7079	4.0527	7.3468	6.2382	5.9644
GeneID:10296	MAEA	23.9279	44.3159	13.5031	24.0219	33.0537
GeneID:57654	KIAA1530	5.942	6.0633	1.6985	3.8573	3.1623
GeneID:285464	CRIPAK	3.8516	3.1383	2.2958	4.9091	1.609
GeneID:7884	SLBP	58.5722	17.4161	50.1513	24.3149	59.8872
GeneID:92305	TMEM129	10.1131	18.7515	4.8675	17.2138	18.8377
GeneID:3954	LETM1	13.2254	14.8856	7.1764	9.4489	20.6263
GeneID:7468	WHSC1	15.116	15.8374	12.593	9.148	12.9083
GeneID:7469	WHSC2	20.7075	29.2698	11.3161	14.1093	24.6785
GeneID:79441	HAUS3	5.1699	1.5345	3.107	2.443	5.2967
GeneID:10608	MXD4	17.3122	8.7943	14.1393	14.1421	8.2514
GeneID:6047	RNF4	41.4968	27.8943	19.0057	18.4417	18.6556
GeneID:8603	FAM193A	12.8837	10.9015	5.8547	9.601	10.5608
GeneID:79155	TNIP2	33.5006	18.8636	11.7666	14.8359	16.5407
GeneID:118	ADD1	56.0031	40.5021	15.2999	34.4379	48.0393
GeneID:10227	MFSD10	59.3542	53.9326	28.6291	15.8156	20.7122
GeneID:317648	NA	5.3534	3.5903	3.9868	2.5305	4.4859
GeneID:8602	NOP14	32.9071	21.4579	28.5896	22.3832	32.2879
GeneID:4043	LRPAP1	5.595	9.1318	5.4099	13.7604	6.774
GeneID:85013	TMEM128	12.8155	6.9133	4.8055	10.912	8.1418
GeneID:55646	LYAR	19.99	17.1566	22.996	21.1984	46.4431
GeneID:53407	STX18	11.4571	6.9108	4.5688	10.2203	7.8078
GeneID:23324	MAN2B2	10.0339	2.628	5.0177	4.9074	9.4908
GeneID:93621	MRFAP1	104.218	184.079	158.102	201.957	210.811
GeneID:114932	MRFAP1L1	36.5459	33.509	27.092	50.4392	43.111
GeneID:55330	CNO	11.8007	10.6072	9.5249	10.4534	16.2616
GeneID:9778	KIAA0232	5.748	5.8529	3.993	9.8669	7.2994
GeneID:57533	TBC1D14	14.169	22.2072	13.9968	25.813	26.7837
GeneID:100129931	NA	10.6262	17.2754	10.1786	17.9482	17.9536
GeneID:93624	TADA2B	7.6836	4.7681	5.2031	6.5678	7.4686
GeneID:80273	GRPEL1	28.8865	20.2363	31.9923	52.1901	29.2603
GeneID:152992	METTL19	3.8252	4.5748	3.0072	3.0801	3.301
GeneID:391634	NA	17.3016	22.0207	19.2974	28.8856	21.3023
GeneID:9364	RAB28	8.8087	5.5515	4.6509	6.3686	10.348
GeneID:259282	BOD1L	14.6368	10.5673	9.9574	8.7799	4.8023
GeneID:26234	NA	13.1653	9.9702	9.294	8.8514	7.4023
GeneID:285550	FAM200B	2.7748	1.6702	2.6026	5.9904	4.9656
GeneID:202020	NA	221.077	142.557	236.32	325.454	170.888
GeneID:80306	MED28	48.1362	42.3933	12.81	48.3185	37.0599
GeneID:54876	DCAF16	11.3515	11.0272	14.7489	17.3265	19.8237
GeneID:64151	NCAPG	16.1313	12.3853	17.5246	8.0918	27.3502
GeneID:254251	LCORL	3.2423	1.6235	3.295	3.1671	4.2893
GeneID:133015	PACRGL	2.0746	3.0597	3.4492	1.7625	5.2617
GeneID:1665	DHX15	72.55	95.7023	61.8581	57.9678	67.3712
GeneID:29063	ZCCHC4	3.6544	3.1586	3.5642	4.4462	4.5431
GeneID:29945	ANAPC4	10.6173	9.5749	4.5055	6.7703	10.0282
GeneID:389203	C4orf52	22.7712	19.5686	14.4123	23.635	18.4742
GeneID:3516	RBPJ	26.3102	25.2137	16.5153	15.4264	8.8879
GeneID:57620	STIM2	6.7676	2.958	1.9337	4.1207	3.2356
GeneID:55276	PGM2	13.1432	7.7304	8.7234	7.6247	17.1844
GeneID:10744	PTTG2	11.2474	15.1374	10.5736	5.3444	13.8088
GeneID:51088	KLHL5	2.7901	4.023	6.9523	10.1856	6.0453
GeneID:57728	WDR19	2.7939	5.4745	10.1451	4.8164	4.0471
GeneID:5981	RFC1	22.8222	18.4688	24.6722	29.2161	18.4779
GeneID:6133	RPL9	66.6455	71.966	87.9789	81.1779	52.5416
GeneID:11019	LIAS	7.1484	5.4561	4.7779	6.3209	11.9302
GeneID:401127	NA	5.7425	8.4369	14.506	11.4623	8.1936
GeneID:3093	UBE2K	26.3017	23.9234	15.5823	26.0135	36.0662
GeneID:23244	PDS5A	22.6626	12.6079	21.4905	19.8899	27.1469
GeneID:55728	N4BP2	3.7241	3.9546	1.836	5.7782	4.421
GeneID:55161	TMEM33	4.2214	6.6299	6.9019	9.2007	8.366
GeneID:10463	SLC30A9	20.0388	17.5198	13.8299	13.1573	22.3897
GeneID:60558	GUF1	13.1223	8.6388	4.8229	9.8321	12.3465
GeneID:152518	NFXL1	5.9757	6.0332	5.4537	6.133	6.0303
GeneID:57606	SLAIN2	8.8194	4.008	4.3825	7.9147	10.0658
GeneID:285527	FRYL	7.6613	3.2226	2.5403	3.1728	4.3712
GeneID:54940	OCIAD1	42.514	30.3168	25.081	25.3597	55.4067
GeneID:23142	DCUN1D4	6.4715	7.306	12.8372	10.7792	7.9834
GeneID:152579	SCFD2	9.0262	3.8142	2.981	3.0502	9.4625
GeneID:81608	FIP1L1	24.8987	18.2272	13.1767	12.7687	25.9784
GeneID:55858	TMEM165	22.3457	22.2524	26.387	20.7573	31.0516
GeneID:9575	CLOCK	2.2871	2.7348	1.9407	3.337	3.2754
GeneID:55763	EXOC1	12.5954	6.6204	7.4762	6.5507	14.2947
GeneID:132949	AASDH	4.3212	3.4612	3.1207	4.588	3.9577
GeneID:5471	PPAT	13.0101	15.7913	9.4281	14.89	16.6745
GeneID:10606	PAICS	71.6724	118.1	95.0062	86.9061	102.288
GeneID:6731	SRP72	45.3281	22.5059	34.1695	32.0837	51.5852
GeneID:5978	REST	7.3461	7.0439	5.2358	5.3909	3.6354
GeneID:84273	C4orf14	33.3805	20.895	23.6548	24.1656	23.9212
GeneID:5431	POLR2B	44.7923	38.4138	26.5102	34.4136	46.0048
GeneID:1060	CENPC1	6.8031	1.8985	3.6539	2.4888	6.0036
GeneID:55236	UBA6	13.0342	4.4515	8.733	11.1033	15.7354
GeneID:550112	NA	9.2643	3.5153	3.3823	5.9291	6.7324
GeneID:91746	YTHDC1	20.7661	15.9772	11.5439	16.3409	10.9129
GeneID:57050	UTP3	35.4239	31.3776	16.6145	15.3975	30.3444
GeneID:22902	RUFY3	3.3589	2.8614	1.2458	3.4879	4.1375
GeneID:2926	GRSF1	17.6271	13.5414	17.9522	12.6834	13.8589
GeneID:1633	DCK	11.549	4.635	9.0392	7.1294	12.8627
GeneID:285521	COX18	5.4909	3.9319	2.2025	3.3174	4.0537
GeneID:26057	ANKRD17	15.7879	20.7705	13.1836	22.8072	19.2814
GeneID:25898	NA	9.3499	5.8831	5.6049	5.0588	10.5697
GeneID:152815	THAP6	2.9728	1.1798	3.3429	3.3136	2.7548
GeneID:9908	G3BP2	51.946	62.0316	26.8147	45.264	42.9771
GeneID:8615	USO1	40.8248	45.2101	19.7033	39.4431	37.0568
GeneID:55153	SDAD1	10.3455	10.5686	7.8421	11.8484	12.2016
GeneID:53371	NUP54	16.3911	22.6472	15.4596	15.4606	25.0928
GeneID:950	SCARB2	10.261	10.9154	17.4546	36.4668	11.7307
GeneID:10983	CCNI	181.787	93.6846	117.623	116.621	99.7751
GeneID:65008	MRPL1	18.8079	8.3346	9.2165	15.3952	21.4894
GeneID:3184	HNRNPD	177.532	197.977	92.0106	92.6339	189.982
GeneID:9987	NA	70.4024	59.0326	51.0031	58.0568	55.2438
GeneID:58478	ENOPH1	25.6208	36.3618	14.9069	28.0696	26.4362
GeneID:100499177	NA	12.5403	11.6827	17.8568	11.868	18.4962
GeneID:79725	THAP9	1.5029	2.803	1.0652	2.8373	1.7013
GeneID:51138	COPS4	25.8624	16.0144	13.2004	24.2808	30.223
GeneID:27235	COQ2	3.4284	7.7226	5.669	3.5363	4.1396
GeneID:113510	HELQ	3.4647	1.4773	2.4695	3.0593	3.758
GeneID:51023	MRPS18C	17.2349	11.5441	12.2536	17.2724	34.149
GeneID:84142	FAM175A	6.4281	5.9527	6.15	9.8104	23.704
GeneID:53343	NUDT9	9.0121	18.0335	6.4417	14.7528	8.9095
GeneID:3327	NA	244.249	432.216	260.173	487.482	365.001
GeneID:84992	PIGY	49.7368	20.0362	34.7877	48.8286	79.6728
GeneID:166815	TIGD2	2.7996	2.0749	3.7118	5.999	6.4927
GeneID:56916	SMARCAD1	10.468	10.8732	7.7143	9.7256	11.5562
GeneID:5910	RAP1GDS1	6.989	6.6422	7.9299	9.5701	10.4017
GeneID:1977	EIF4E	9.2105	5.686	4.7782	11.2363	12.619
GeneID:23173	METAP1	25.5064	31.766	26.0672	47.2758	23.0647
GeneID:8649	LAMTOR3	8.2807	2.5105	3.0005	7.4449	8.492
GeneID:79982	DNAJB14	9.0548	2.4126	4.2301	7.6675	5.7193
GeneID:3015	H2AFZ	318.098	395.709	320.513	175.42	455.553
GeneID:5530	PPP3CA	4.3491	7.6288	6.7049	7.6641	3.1534
GeneID:4126	MANBA	16.0454	10.9575	9.6013	25.4533	7.9585
GeneID:7323	UBE2D3	100.471	58.8895	44.2443	66.7978	71.199
GeneID:493856	CISD2	8.0339	7.2475	6.3003	9.9539	14.9357
GeneID:150159	NHEDC1	5.633	6.0262	4.2777	6.8598	11.6637
GeneID:56898	BDH2	3.8332	4.5301	2.5517	3.9306	1.1459
GeneID:1062	CENPE	7.0773	3.5634	4.1703	2.5589	9.481
GeneID:27068	PPA2	30.2283	9.8672	19.5906	9.5872	23.0193
GeneID:57117	INTS12	18.2403	5.2678	7.095	9.5319	16.0288
GeneID:79807	GSTCD	4.3564	5.1074	2.3216	3.7295	5.4773
GeneID:9255	AIMP1	22.246	9.7498	16.1098	27.9957	20.2981
GeneID:9061	PAPSS1	22.292	49.0581	12.9402	51.5871	33.1891
GeneID:3033	HADH	35.0419	27.4666	32.2971	23.134	37.4352
GeneID:6164	RPL34	486.284	167.99	303.618	363.129	211.574
GeneID:58505	OSTC	115.94	46.4206	52.1206	147.762	127.154
GeneID:10427	SEC24B	10.7989	7.9045	7.6925	13.0759	10.6682
GeneID:839	CASP6	7.1392	7.041	4.125	4.5216	15.326
GeneID:55345	C4orf21	3.822	4.5756	4.4088	1.6195	3.0685
GeneID:100093630	NA	162.114	64.4053	153.676	117.462	138.987
GeneID:57721	METTL14	10.5485	6.5853	8.3129	8.6012	7.0232
GeneID:401149	NA	3.7495	3.1143	1.3735	3.3786	3.1396
GeneID:4085	MAD2L1	39.9202	24.1658	33.2804	21.8009	53.2211
GeneID:308	ANXA5	80.7435	131.666	140.738	180.216	66.4405
GeneID:5393	EXOSC9	35.0462	26.9791	29.4098	14.4767	37.5729
GeneID:890	CCNA2	32.2702	28.5743	29.4182	19.8003	70.0281
GeneID:55212	BBS7	2.1553	2.405	2.679	3.5951	3.893
GeneID:84162	KIAA1109	5.4211	3.9102	3.4593	9.0632	3.0858
GeneID:11162	NUDT6	3.0992	11.9429	7.7624	3.0188	8.1795
GeneID:10733	PLK4	9.3121	8.523	11.8077	5.0831	12.7059
GeneID:256471	MFSD8	3.7398	1.4588	2.1779	5.6753	2.6619
GeneID:80167	C4orf29	5.3628	3.2385	2.9987	4.8351	5.2855
GeneID:55132	LARP1B	4.3767	4.2234	3.3486	8.4469	5.658
GeneID:10424	PGRMC2	17.1617	14.3969	25.8041	44.3469	20.9299
GeneID:25819	CCRN4L	6.7459	13.3992	4.1427	4.0018	5.4603
GeneID:1998	ELF2	9.7979	10.6845	10.3049	12.0302	12.0148
GeneID:4717	NDUFC1	18.1816	12.8415	9.7957	22.5088	26.2445
GeneID:80155	NAA15	16.0416	17.9041	10.0695	11.3219	27.0126
GeneID:83452	RAB33B	5.2776	2.4777	2.5166	5.1711	1.6229
GeneID:255520	ELMOD2	4.2845	2.9809	3.7648	11.2067	7.0772
GeneID:27309	ZNF330	36.2733	18.3581	22.8019	22.2609	35.5523
GeneID:84640	USP38	8.425	2.4123	3.8994	5.1702	8.2755
GeneID:2549	GAB1	1.5465	2.1672	1.3018	3.6949	1.5777
GeneID:8467	SMARCA5	21.1113	31.8829	9.3447	15.5627	19.7655
GeneID:10393	ANAPC10	9.9111	3.3909	4.07	5.7079	11.0171
GeneID:6059	ABCE1	25.2734	13.1205	11.2947	21.6155	33.1068
GeneID:54726	OTUD4	6.6536	5.7396	5.3946	11.1557	6.3773
GeneID:55751	TMEM184C	7.59	10.5478	5.768	9.728	7.7816
GeneID:90826	PRMT10	4.0083	3.598	3.2103	3.1856	3.8281
GeneID:987	LRBA	19.5308	16.0984	7.1913	11.4917	15.8849
GeneID:6189	RPS3A	747.056	384.214	502.933	673.175	447.716
GeneID:5188	PET112	11.1328	10.3773	9.4958	13.5781	9.0489
GeneID:54553	NA	3.9017	1.1017	2.6599	3.1059	3.5538
GeneID:27236	ARFIP1	5.0285	7.5152	5.6977	7.6558	8.0798
GeneID:84057	MND1	13.0632	10.1224	16.5805	7.643	23.9563
GeneID:5356	PLRG1	17.3488	13.6472	12.5169	17.7794	24.9525
GeneID:201725	C4orf46	8.8545	7.6753	2.5145	2.5513	7.5704
GeneID:92345	NAF1	5.5205	6.2606	4.4004	5.428	7.7479
GeneID:55319	C4orf43	19.5789	13.008	13.171	15.7314	14.9468
GeneID:23520	ANP32C	43.3067	48.0261	39.5982	34.5484	44.9284
GeneID:201931	TMEM192	4.4884	2.3799	4.0091	7.1819	5.2086
GeneID:11275	KLHL2	7.7162	4.3494	4.7868	6.3598	2.9952
GeneID:84869	CBR4	8.9825	5.2037	3.7363	7.3813	6.5464
GeneID:4750	NEK1	2.8218	1.8781	2.3401	2.1485	5.5237
GeneID:1182	CLCN3	7.701	10.0268	9.3686	13.2428	20.7374
GeneID:54969	C4orf27	13.2666	9.3521	9.7876	4.447	16.366
GeneID:441051	NA	23.0056	15.3076	26.1001	20.9122	28.3672
GeneID:3148	HMGB2	218.714	109.114	130.997	92.4397	207.802
GeneID:8819	SAP30	20.1439	6.8331	11.702	6.7299	20.5687
GeneID:26269	FBXO8	6.2754	1.6821	5.6214	4.9461	6.4609
GeneID:80817	CEP44	4.3818	1.5135	4.0755	2.3894	5.8545
GeneID:175	AGA	8.9119	4.2927	4.0789	12.2103	8.4691
GeneID:1635	DCTD	51.2267	24.5458	29.5041	59.2702	40.5325
GeneID:55602	CDKN2AIP	10.6546	6.0777	18.0738	13.4038	11.762
GeneID:3622	ING2	10.8509	8.641	17.3326	5.3945	8.0483
GeneID:60684	C4orf41	10.2505	8.5636	4.5454	7.654	11.0602
GeneID:836	CASP3	35.2492	20.184	9.6111	17.2735	16.6666
GeneID:291	SLC25A4	16.4367	15.1459	7.83	9.2323	10.7328
GeneID:3323	NA	8.4064	13.6038	6.4012	7.395	13.3354
GeneID:133957	CCDC127	10.6874	11.5002	24.1925	16.4556	9.216
GeneID:6389	SDHA	64.5634	40.4706	116.451	83.4376	68.2361
GeneID:10016	PDCD6	72.238	55.2018	125.695	54.0371	98.1967
GeneID:81037	CLPTM1L	60.0707	40.5027	83.1678	37.0097	60.0955
GeneID:728609	NA	23.7249	18.755	35.3821	34.2567	18.7033
GeneID:728613	NA	3.1048	4.1572	9.176	4.0298	5.8111
GeneID:64979	MRPL36	54.8001	30.8824	112.012	42.4328	49.9704
GeneID:4726	NDUFS6	96.684	227.832	170.341	73.1165	247.897
GeneID:23379	KIAA0947	8.5992	12.9684	20.8556	10.2481	10.4982
GeneID:54888	NSUN2	33.5811	34.343	57.4892	26.6689	47.8212
GeneID:4552	MTRR	10.3658	8.2399	20.3664	14.1215	13.7817
GeneID:22948	CCT5	62.4425	132.965	170.681	96.5239	169.516
GeneID:10299	2023-03-06	39.3771	24.9577	72.0039	32.9943	36.7329
GeneID:90441	ZNF622	29.4405	16.9351	42.6061	18.8296	27.5666
GeneID:728411	NA	1.6783	2.1508	2.2666	1.7039	2.5853
GeneID:55322	C5orf22	7.6227	6.5452	12.5532	5.7456	11.341
GeneID:64083	GOLPH3	34.7118	29.0926	70.8252	56.8156	39.0268
GeneID:54545	MTMR12	6.8786	12.3737	11.1638	18.7191	9.9282
GeneID:51663	ZFR	20.6027	20.1533	30.8961	35.4084	26.3849
GeneID:6897	TARS	73.7757	104.851	135.544	64.7747	115.195
GeneID:5810	NA	5.3684	5.4642	15.8289	5.5461	12.1492
GeneID:55299	BRIX1	29.036	22.1126	61.1622	22.3838	56.3147
GeneID:134218	DNAJC21	9.4045	6.57	13.0128	7.3095	13.1372
GeneID:6502	SKP2	11.0132	30.3121	24.3601	19.2655	25.7776
GeneID:25836	NIPBL	12.373	8.1808	15.1566	12.6428	14.2565
GeneID:9631	NUP155	9.796	15.5165	28.5841	9.9316	20.154
GeneID:55100	WDR70	13.5777	13.2835	20.0133	11.1642	15.9955
GeneID:6167	RPL37	908.543	265.714	801.103	291.261	426.011
GeneID:285636	C5orf51	6.2326	5.3678	12.5396	4.6888	7.9913
GeneID:7690	ZNF131	9.5026	10.741	26.2762	9.3917	15.3489
GeneID:10605	PAIP1	6.7638	6.658	16.3609	11.0534	11.7549
GeneID:10884	MRPS30	33.4718	22.424	65.5678	18.4654	49.3288
GeneID:53918	PELO	8.2876	11.4829	20.1705	19.4015	8.4751
GeneID:4724	NDUFS4	55.7805	39.6019	51.3877	66.5437	40.076
GeneID:54505	DHX29	6.6737	8.2483	5.9111	4.417	11.0928
GeneID:23517	SKIV2L2	20.0489	24.4537	22.3725	20.0119	36.6379
GeneID:379013	NA	1.6303	1.7164	1.7984	1.0634	2.4895
GeneID:153129	SLC38A9	4.1283	6.2267	5.4371	7.2677	4.4437
GeneID:4214	MAP3K1	3.2327	2.2154	2.5104	7.6518	2.9427
GeneID:166968	MIER3	4.2261	4.194	5.9692	7.5337	4.6213
GeneID:65056	GPBP1	22.7159	20.1514	17.5895	18.5971	21.1008
GeneID:55789	DEPDC1B	10.7932	15.0409	7.9434	17.259	17.7377
GeneID:1161	ERCC8	3.69	4.5453	3.6016	7.8559	5.2029
GeneID:91942	NDUFAF2	10.9194	13.5951	31.4695	20.8518	22.1028
GeneID:643155	C5orf43	23.6222	7.477	17.7332	13.3226	28.6061
GeneID:3796	KIF2A	27.1012	17.3774	14.2529	9.7265	34.7867
GeneID:27292	DIMT1L	19.4812	12.9025	19.0328	14.5491	38.1822
GeneID:51194	IPO11	5.1734	9.605	7.8784	5.8322	15.9878
GeneID:285672	SREK1IP1	6.9377	3.2614	5.977	4.3867	5.1813
GeneID:10283	CWC27	18.4225	19.2112	15.1792	14.3616	16.484
GeneID:64105	CENPK	9.3796	5.768	14.1378	5.6411	14.8806
GeneID:23398	PPWD1	20.9405	14.0476	14.9284	18.5765	21.6237
GeneID:373	TRIM23	1.7513	2.1441	3.5275	5.9308	1.5389
GeneID:80006	NA	3.712	2.9411	3.6256	4.1382	5.4535
GeneID:140890	SREK1	22.8788	8.1561	17.9635	19.2293	18.1281
GeneID:64924	SLC30A5	11.2852	4.5458	9.6514	10.7811	15.4645
GeneID:891	CCNB1	52.8837	103.236	69.35	34.8354	102.369
GeneID:92259	MRPS36	14.2138	5.5617	11.4425	12.9342	19.4596
GeneID:1022	CDK7	13.0364	14.6732	30.9932	14.3246	14.7105
GeneID:6880	TAF9	44.6018	26.1748	59.6746	59.6183	71.174
GeneID:5884	RAD17	16.1553	4.8467	6.9388	9.1875	10.1136
GeneID:728340	GTF2H2C	15.4541	13.4251	9.4499	18.8446	23.4019
GeneID:653188	NA	3.7715	8.2821	4.0389	4.6125	4.4807
GeneID:728492	SERF1B	13.8933	18.5124	12.6449	14.3915	17.108
GeneID:6607	SMN2	57.6129	30.5006	56.6293	46.9191	50.0409
GeneID:100170939	NA	7.1896	9.9975	8.7896	9.2912	9.3894
GeneID:653238	NA	12.4459	5.9963	9.499	12.3075	17.4459
GeneID:11042	NA	5.7858	7.0766	5.5227	5.9136	7.4298
GeneID:8293	SERF1A	7.5743	14.6056	9.0944	10.5999	7.1473
GeneID:6606	SMN1	59.242	28.5339	59.8717	48.5721	52.9395
GeneID:4671	NAIP	3.1361	1.1118	2.5014	3.1857	3.3587
GeneID:2966	GTF2H2	17.9965	11.2079	11.5588	20.6594	27.0803
GeneID:55814	BDP1	5.922	3.4125	7.0114	5.9772	5.5052
GeneID:64087	MCCC2	28.5222	29.1972	15.2677	23.9448	20.8247
GeneID:23107	MRPS27	42.3297	39.7011	43.3747	40.212	39.1061
GeneID:79810	PTCD2	4.2513	3.9107	5.9733	2.9767	6.1044
GeneID:3842	TNPO1	13.4574	17.6327	25.3495	16.84	19.2092
GeneID:689	BTF3	413.242	196.314	420.454	363.982	298.858
GeneID:84135	UTP15	5.6965	4.836	5.3047	4.5389	5.846
GeneID:3074	HEXB	21.6206	19.4499	57.0207	46.9806	57.3928
GeneID:84340	GFM2	10.955	9.5941	12.9495	10.9485	14.3595
GeneID:10412	NSA2	96.1102	26.9513	86.2743	59.9498	48.4967
GeneID:10087	COL4A3BP	12.9524	7.6321	6.3335	8.5875	8.0578
GeneID:134359	POC5	6.2831	2.3009	4.5421	3.0052	8.3356
GeneID:55109	AGGF1	10.1079	4.9571	11.2946	8.1449	7.6684
GeneID:55255	WDR41	26.1734	12.5716	10.2886	9.6635	19.2343
GeneID:6902	TBCA	81.4843	53.5285	90.4536	140.443	109.025
GeneID:8546	AP3B1	20.1498	13.2687	17.144	19.7197	20.8223
GeneID:9522	SCAMP1	4.1116	4.6992	8.9401	12.6033	4.356
GeneID:133746	JMY	3.8992	2.6106	7.2277	6.2975	2.3667
GeneID:441089	NA	7.4844	11.1672	10.13	5.9436	13.1404
GeneID:9765	ZFYVE16	2.4482	2.5594	6.6066	8.4053	4.5643
GeneID:1719	DHFR	20.731	21.7359	39.0902	11.8483	46.0234
GeneID:4437	MSH3	6.7567	5.4282	9.2363	4.3296	7.281
GeneID:100131067	NA	1.2974	2.4669	4.2029	2.3226	2.5564
GeneID:84240	ZCCHC9	15.6901	8.5143	11.971	18.2766	18.3764
GeneID:6228	RPS23	508.378	159.022	324.234	353.893	277.987
GeneID:153339	TMEM167A	16.5604	23.3406	17.7934	24.6224	26.7524
GeneID:7518	XRCC4	8.8738	2.2508	4.9708	2.8758	8.2298
GeneID:1350	COX7C	811.988	788.929	441.735	525.195	543.531
GeneID:5921	RASA1	21.847	9.8257	8.384	11.0328	7.056
GeneID:902	CCNH	16.6396	12.8645	25.6931	20.1933	32.4488
GeneID:1070	CETN3	23.4553	7.2873	11.341	24.2671	25.3372
GeneID:153364	MBLAC2	3.4486	1.2361	3.192	3.6752	4.1501
GeneID:9652	TTC37	20.7421	10.9324	20.8369	19.4376	18.5763
GeneID:153642	ARSK	1.4894	3.2331	2.8396	3.7011	2.3325
GeneID:55781	RIOK2	8.3696	4.7342	7.632	5.1467	7.6045
GeneID:1105	CHD1	12.3484	7.0561	9.7547	13.8688	12.1256
GeneID:2241	FER	2.5826	1.2691	3.076	2.9177	2.9702
GeneID:9867	PJA2	38.921	10.732	26.1838	33.4589	30.5759
GeneID:134430	WDR36	10.5943	4.8908	8.1407	8.6226	9.7513
GeneID:114915	NA	32.0118	27.3871	64.0254	24.757	17.7316
GeneID:324	APC	3.2257	3.2111	3.3175	3.081	4.4728
GeneID:6728	SRP19	18.4245	9.3549	12.2508	13.6209	14.7551
GeneID:7905	REEP5	20.5163	13.6678	21.1629	24.9162	12.6094
GeneID:64848	YTHDC2	8.4867	5.1401	5.5997	6.8513	6.1743
GeneID:5229	PGGT1B	7.2048	3.5821	5.3868	8.11	6.8539
GeneID:153733	CCDC112	1.2858	2.6494	3.2426	1.7076	3.0146
GeneID:100302736	TMED7-TICAM2	6.5559	2.9765	5.5822	7.6757	6.4578
GeneID:9140	NA	12.9701	4.5667	9.6271	9.9534	9.0076
GeneID:51397	COMMD10	11.6193	9.8244	10.332	10.9353	10.6191
GeneID:1657	DMXL1	10.0189	4.3563	3.1374	3.5298	6.7267
GeneID:153443	SRFBP1	4.3261	3.1711	4.8188	3.4683	5.1733
GeneID:6643	SNX2	44.1614	28.3543	26.9043	29.6941	32.9595
GeneID:153241	CEP120	6.7027	2.841	7.2143	4.149	6.1754
GeneID:1456	CSNK1G3	6.8898	5.7866	9.0819	10.277	6.1178
GeneID:51808	PHAX	13.4056	12.2816	12.1597	8.6016	7.5629
GeneID:4001	LMNB1	50.21	68.721	40.5825	22.5617	65.9133
GeneID:133619	PRRC1	19.4662	13.7246	13.4485	19.122	13.6816
GeneID:6558	SLC12A2	5.4995	2.3333	2.2652	2.3831	3.5806
GeneID:51015	ISOC1	13.6241	14.2849	10.755	20.7557	27.3965
GeneID:3094	NA	303.935	177.148	285.392	445.08	299.829
GeneID:51735	RAPGEF6	6.484	2.4579	3.7623	6.212	4.1821
GeneID:10111	RAD50	19.7451	9.8852	15.2068	15.82	18.3168
GeneID:11127	KIF3A	4.7324	1.9148	1.2743	2.1357	1.4766
GeneID:27089	UQCRQ	45.504	31.789	54.8625	37.4595	69.5782
GeneID:27125	AFF4	9.3752	7.7735	13.0288	19.3209	8.8727
GeneID:54819	ZCCHC10	7.6702	3.6948	3.8705	9.9897	9.9895
GeneID:3308	HSPA4	43.3901	118.454	40.0332	60.1645	74.2949
GeneID:56951	C5orf15	25.7682	12.5543	23.5355	45.4536	17.656
GeneID:7416	NA	164.707	55.5515	125.344	135.508	88.5758
GeneID:6500	SKP1	46.9089	29.9131	40.2308	48.7796	61.0146
GeneID:5515	PPP2CA	58.4871	61.8672	57.1471	48.3753	72.8904
GeneID:100500905	NA	60.0492	118.11	48.3413	45.8185	76.1166
GeneID:91368	CDKN2AIPNL	16.9423	20.4685	12.9971	14.9698	27.1842
GeneID:23338	PHF15	11.8185	10.0318	9.1912	3.3905	4.698
GeneID:10802	SEC24A	19.0766	6.2002	9.6198	18.5547	8.1421
GeneID:819	CAMLG	25.328	19.6001	44.9623	23.8743	14.7297
GeneID:9879	DDX46	18.8432	30.1776	32.2989	18.0191	20.0676
GeneID:79770	TXNDC15	11.2111	5.8914	6.19	10.6495	4.1148
GeneID:84105	PCBD2	2.5878	2.4861	4.175	2.3139	3.5265
GeneID:9555	H2AFY	59.1398	43.1841	60.1641	47.0838	98.5526
GeneID:4090	SMAD5	3.6728	6.579	12.3032	13.8308	9.4636
GeneID:10949	HNRNPA0	85.9753	116.968	58.3578	60.3503	61.7612
GeneID:51306	FAM13B	11.1114	2.9392	6.7128	4.6166	6.5955
GeneID:10902	BRD8	7.9507	16.001	25.0395	14.1109	18.294
GeneID:10112	KIF20A	11.5483	27.1459	25.9454	10.0887	15.924
GeneID:8697	CDC23	19.272	13.2554	17.2532	16.1896	21.4153
GeneID:995	CDC25C	5.0868	8.9088	6.2878	6.4425	11.7077
GeneID:51307	FAM53C	21.4493	23.8178	15.8522	13.2119	19.0021
GeneID:51780	KDM3B	15.7401	26.1792	16.2996	14.8593	21.5981
GeneID:2107	ETF1	41.4516	42.5349	50.6965	51.2879	61.3248
GeneID:3313	HSPA9	83.0609	108.082	116.632	141.082	167.501
GeneID:1495	CTNNA1	35.3671	127.668	89.9032	90.3313	68.7537
GeneID:724102	NA	11.7629	28.6649	12.5085	10.3869	14.7962
GeneID:9782	MATR3	63.5008	56.9251	50.8104	64.3298	54.9608
GeneID:9782	MATR3	63.5008	56.9251	50.8104	64.3298	54.9608
GeneID:51247	PAIP2	92.9107	59.3889	76.8999	81.7971	75.2496
GeneID:389333	LOC389333	4.457	1.3482	1.8357	1.7115	1.413
GeneID:202052	DNAJC18	3.6042	3.9599	2.3955	2.9797	1.4425
GeneID:7322	UBE2D2	51.5417	30.8255	27.8523	38.3595	42.2854
GeneID:5201	PFDN1	39.1659	28.4865	35.7379	42.5113	35.0763
GeneID:54882	ANKHD1	26.989	21.1665	26.7785	24.9377	23.6466
GeneID:404734	ANKHD1-EIF4EBP3	27.0753	21.4019	26.8881	24.7411	23.6337
GeneID:8637	EIF4EBP3	14.7674	9.5214	7.4362	7.3324	8.0002
GeneID:10011	SRA1	26.5833	17.6779	9.3518	9.5736	19.6294
GeneID:55374	TMCO6	5.9276	13.4339	10.2749	11.7107	9.3427
GeneID:4695	NA	88.8055	62.2092	41.7007	42.1134	89.4475
GeneID:3550	IK	34.64	22.4854	38.4383	25.7989	36.2025
GeneID:54853	WDR55	15.0794	9.543	12.6755	8.9228	14.4388
GeneID:373863	DND1	8.1167	6.5898	7.4943	6.4356	8.8471
GeneID:3035	HARS	42.7433	29.649	35.6529	25.9073	35.106
GeneID:23438	HARS2	16.0505	12.833	15.8353	10.5713	12.5689
GeneID:153527	ZMAT2	64.2218	49.7852	51.799	49.4469	47.1488
GeneID:6879	TAF7	62.8128	46.2826	67.4489	52.9633	59.1194
GeneID:1729	DIAPH1	41.779	34.114	56.2857	33.503	90.2374
GeneID:8841	HDAC3	50.4334	50.2056	35.5796	37.9243	44.5237
GeneID:89848	FCHSD1	13.8693	12.4006	5.0313	5.5449	10.958
GeneID:9812	KIAA0141	11.4658	12.5338	14.1045	11.9752	13.0985
GeneID:81555	YIPF5	18.257	5.8971	19.8843	21.0996	10.1837
GeneID:51520	LARS	31.4806	59.7538	35.6755	34.7871	59.1965
GeneID:54439	RBM27	9.8894	10.8475	7.4377	7.792	9.7803
GeneID:10915	TCERG1	30.1909	28.0675	32.5181	22.2551	31.0958
GeneID:81545	FBXO38	9.8509	7.6232	10.2393	10.6128	6.9764
GeneID:134266	GRPEL2	7.1933	5.498	9.2748	7.0296	6.3621
GeneID:1452	CSNK1A1	40.0594	39.508	41.4278	37.04	46.8831
GeneID:1836	SLC26A2	1.6608	2.4076	2.4401	1.9612	2.6534
GeneID:81789	NA	1.8917	1.0367	2.0989	1.0905	2.242
GeneID:22993	HMGXB3	15.6639	14.2355	12.45	10.218	17.6735
GeneID:6208	RPS14	1894.78	733.787	1194.23	1072.28	842.307
GeneID:55696	RBM22	32.4637	11.9894	33.3577	18.0488	28.4484
GeneID:51164	DCTN4	12.9676	10.8151	15.6449	16.383	27.9483
GeneID:206358	SLC36A1	1.3107	2.9229	2.6222	4.5127	3.4909
GeneID:475	ATOX1	95.5936	61.1883	29.587	52.58	54.9479
GeneID:10146	G3BP1	48.5972	65.2271	50.0302	42.8186	45.5927
GeneID:4238	MFAP3	4.488	4.9113	10.6352	8.6452	5.4226
GeneID:79685	SAP30L	2.9274	3.5168	4.3299	5.88	4.281
GeneID:23367	LARP1	46.6602	97.469	48.4318	46.69	53.3011
GeneID:9337	CNOT8	25.9159	20.5481	51.7774	43.8571	23.9487
GeneID:25929	GEMIN5	7.8759	12.4618	10.4353	9.1229	10.1885
GeneID:29093	MRPL22	11.2688	8.8598	10.8782	9.7089	12.5485
GeneID:9443	MED7	13.6508	4.2247	9.7549	7.2796	7.2871
GeneID:54974	THG1L	26.1491	10.3746	22.3924	15.101	17.6212
GeneID:134353	LSM11	2.1603	2.0759	5.9005	3.5755	2.5911
GeneID:9685	CLINT1	15.2363	22.9633	22.915	25.668	30.6501
GeneID:153830	RNF145	15.8464	15.9306	20.7138	12.0341	13.2128
GeneID:134510	UBLCP1	13.1688	10.1953	8.6242	9.4865	20.1537
GeneID:7265	TTC1	40.6085	31.7487	31.8406	19.165	44.6634
GeneID:114825	PWWP2A	5.6354	10.5781	6.9227	4.1414	4.3292
GeneID:10569	SLU7	20.9389	6.5914	18.8101	13.5937	13.1332
GeneID:9232	PTTG1	68.4899	78.3858	75.6148	37.5505	78.2909
GeneID:900	CCNG1	125.984	104.866	50.0704	166.537	104.097
GeneID:134492	NUDCD2	33.1552	23.1289	41.7178	28.4218	46.3302
GeneID:27430	MAT2B	44.6496	24.3547	25.2911	19.1901	24.6834
GeneID:5917	RARS	54.2399	35.8591	45.1213	43.4328	48.5997
GeneID:79646	PANK3	8.1302	9.5648	7.4557	27.9506	9.678
GeneID:54908	CCDC99	11.2631	12.3229	20.7807	6.4756	15.752
GeneID:4869	NPM1	410.122	239.138	420.336	381.295	308.992
GeneID:23291	FBXW11	17.1225	17.6811	14.4272	19.4739	10.6797
GeneID:51121	RPL26L1	19.4757	15.7875	20.4943	18.9371	17.8286
GeneID:662	BNIP1	13.1686	5.8333	5.8531	5.4235	8.4832
GeneID:94081	SFXN1	41.6618	23.49	24.6649	49.6907	36.4691
GeneID:84321	THOC3	39.3051	39.4206	41.2274	26.4473	48.1421
GeneID:375484	C5orf25	2.9277	4.9777	2.2641	5.0853	8.5724
GeneID:57179	KIAA1191	25.149	27.8401	37.0994	53.8302	24.808
GeneID:51491	NOP16	44.8353	52.1358	40.8928	32.8773	60.4771
GeneID:192286	HIGD2A	178.053	70.3989	85.1185	114.951	135.596
GeneID:1212	CLTB	19.1955	16.7416	19.9979	16.0304	38.9931
GeneID:23197	FAF2	18.462	13.9735	21.3413	17.5208	16.5172
GeneID:22838	RNF44	23.4368	59.931	27.8316	31.318	24.1074
GeneID:26262	TSPAN17	6.7349	26.2594	8.1961	6.7345	20.7531
GeneID:51720	UIMC1	13.9616	10.3028	10.8136	12.6149	8.6099
GeneID:23567	ZNF346	6.7756	8.3591	6.5851	4.6648	9.4016
GeneID:53917	RAB24	20.5635	13.0713	11.9781	19.7008	29.3799
GeneID:27166	PRELID1	70.3981	87.5664	50.9883	57.8784	100.792
GeneID:83463	MXD3	19.481	21.4397	18.2175	14.9419	25.2459
GeneID:10960	LMAN2	76.063	72.3214	46.4133	60.0638	82.0055
GeneID:2161	F12	1.7735	1.9094	2.9197	6.4947	6.3538
GeneID:80758	PRR7	6.766	3.4748	2.769	3.5871	2.7854
GeneID:51428	DDX41	63.8982	41.9222	40.4851	24.582	52.1239
GeneID:54540	NA	13.9938	14.1392	8.5827	6.2676	13.4608
GeneID:54732	TMED9	145.901	127.741	93.6499	186.174	161.195
GeneID:11285	B4GALT7	13.2197	10.1534	9.9121	10.2521	9.6487
GeneID:728554	NA	27.9986	21.6589	36.3213	28.7491	42.5648
GeneID:55651	NHP2	74.1473	102.694	65.4178	39.4181	89.122
GeneID:64396	NA	2.3393	2.1489	3.1016	4.6804	2.9361
GeneID:85007	AGXT2L2	19.1235	5.9601	12.2844	13.2228	10.5034
GeneID:57396	CLK4	6.2368	2.9202	5.8205	10.7175	3.6499
GeneID:117608	ZNF354B	2.577	2.1102	4.702	3.9698	4.7015
GeneID:80230	RUFY1	13.3921	12.1968	12.7875	10.1855	11.0618
GeneID:3187	HNRNPH1	263.752	176.459	194.749	224.963	150.22
GeneID:821	CANX	192.197	116.778	234.187	217.552	207.042
GeneID:9794	MAML1	9.5595	17.6583	14.5411	14.3213	8.0303
GeneID:11282	MGAT4B	18.4134	35.719	43.1151	49.2488	40.0059
GeneID:8878	SQSTM1	61.8119	47.8702	140.765	78.6277	88.4113
GeneID:51149	C5orf45	14.2227	13.695	12.3143	18.993	11.8397
GeneID:23061	TBC1D9B	28.3666	21.1828	45.518	24.2077	21.7564
GeneID:5601	MAPK9	7.5366	7.3702	10.5555	9.8786	9.1049
GeneID:57472	CNOT6	8.9821	7.548	10.2592	8.8642	8.1232
GeneID:4245	MGAT1	54.152	27.063	16.3754	35.3459	30.784
GeneID:643836	ZFP62	7.3818	7.1746	10.5353	6.089	8.3698
GeneID:90933	TRIM41	20.9597	12.5529	18.7117	9.2526	22.5975
GeneID:10399	GNB2L1	2313.94	1787.02	1828.45	1910.28	1541.91
GeneID:84851	TRIM52	8.4509	3.8131	11.0637	7.9046	9.849
GeneID:55770	EXOC2	8.4897	16.4112	6.976	9.8835	11.7154
GeneID:56897	WRNIP1	14.2638	16.7956	29.0317	40.7009	26.7291
GeneID:8737	RIPK1	4.5728	7.6374	6.409	8.6422	13.2528
GeneID:389362	PSMG4	13.2386	24.3881	19.0385	14.5969	33.665
GeneID:8899	PRPF4B	20.2273	13.1278	15.5449	29.6795	18.7303
GeneID:9425	CDYL	10.4238	24.0084	11.7336	9.8625	10.1664
GeneID:57128	LYRM4	15.8195	23.4138	12.3498	32.6237	21.9812
GeneID:57128	LYRM4	15.8195	23.4138	12.3498	32.6237	21.9812
GeneID:10667	FARS2	8.9272	6.244	6.5627	5.8326	11.9923
GeneID:6239	RREB1	9.6414	7.9782	10.2381	16.9765	13.5448
GeneID:83732	RIOK1	14.4073	9.4716	11.4623	14.1694	20.0228
GeneID:154007	SNRNP48	5.0321	4.2716	15.1316	10.4056	10.3428
GeneID:81567	TXNDC5	105.753	66.9121	77.1356	207.467	76.6096
GeneID:100526836	NA	108.991	68.4128	79.8831	214.502	79.6856
GeneID:63915	MUTED	8.8943	4.072	6.8562	13.7064	12.5291
GeneID:100526837	NA	13.1613	13.5634	10.8533	24.4984	31.3516
GeneID:51000	SLC35B3	11.3032	4.2795	3.7448	10.0387	10.2525
GeneID:55003	PAK1IP1	15.504	22.0184	16.5152	22.0387	30.3986
GeneID:51522	TMEM14C	53.6563	51.4083	113.598	97.166	138.347
GeneID:81853	TMEM14B	46.8463	22.7596	66.251	47.2891	88.2493
GeneID:3096	HIVEP1	7.4146	4.6531	3.3735	4.1769	4.337
GeneID:51256	TBC1D7	13.5416	18.9763	6.9809	10.1303	25.4548
GeneID:23408	SIRT5	3.9163	3.4067	3.0785	6.813	4.3649
GeneID:51406	NOL7	57.7621	38.4555	46.7421	72.2421	89.1574
GeneID:10048	RANBP9	20.2132	11.0963	17.4044	27.3108	43.6774
GeneID:63933	CCDC90A	5.0905	5.5791	6.5825	5.1717	12.4065
GeneID:9972	NUP153	23.5285	22.6082	23.9988	25.6018	36.5578
GeneID:7913	DEK	101.71	36.5804	123.158	79.0193	100.637
GeneID:1871	E2F3	4.9546	13.9098	13.4013	5.3763	17.079
GeneID:54901	CDKAL1	6.7458	5.6122	5.7579	6.1274	8.4007
GeneID:57380	MRS2	10.1495	23.274	8.8	20.5704	16.9564
GeneID:51567	TDP2	30.7272	20.0654	27.1207	37.9174	30.6572
GeneID:55856	ACOT13	8.181	8.4239	7.597	12.8702	12.1818
GeneID:51053	GMNN	26.6079	38.1762	45.0321	47.8471	79.3992
GeneID:8364	HIST1H4C	40.8056	22.1058	20.6773	47.4533	42.7655
GeneID:11120	BTN2A1	11	6.1238	10.4653	16.2833	10.2129
GeneID:10473	HMGN4	49.3466	23.2078	39.8028	37.9982	54.5959
GeneID:29777	ABT1	20	15.4831	12.2964	20.6115	26.8864
GeneID:79692	ZNF322A	4.8991	4.4683	6.1124	10.7116	8.554
GeneID:387036	NA	6.9766	10.5705	6.6058	6.828	12.1391
GeneID:7738	ZNF184	4.5834	1.9432	3.1028	2.3469	5.9304
GeneID:8362	HIST1H4K	28.3733	26.4024	9.3215	17.1362	28.2525
GeneID:7745	ZNF192	7.0532	5.514	10.3429	15.544	11.7671
GeneID:7746	ZNF193	4.2916	5.4465	5.5913	6.4701	8.861
GeneID:387032	ZKSCAN4	4.1626	3.2923	3.3173	3.9011	2.7887
GeneID:7741	ZNF187	3.7558	3.3835	3.5962	6.2393	3.4077
GeneID:84547	PGBD1	1.6624	4.1296	3.931	4.0614	4.8009
GeneID:9753	ZSCAN12	3.2913	2.5004	2.3311	2.4967	4.0324
GeneID:5987	TRIM27	23.8304	36.365	34.0279	41.6715	68.0647
GeneID:30834	ZNRD1	30.1281	23.1245	25.406	34.3758	63.1343
GeneID:6992	PPP1R11	25.9937	15.7358	30.8234	25.5041	36.7978
GeneID:80352	RNF39	1.1965	1.3444	2.7444	4.1	1.6642
GeneID:414777	NA	3.6617	6.2541	4.2422	8.5454	7.0664
GeneID:56658	TRIM39	5.9092	8.294	5.5643	6.2707	5.9101
GeneID:202658	TRIM39-RPP21	13.5809	22.6833	16.1807	16.4688	34.6006
GeneID:79897	RPP21	31.8375	52.8704	44.7099	41.2668	106.893
GeneID:2794	GNL1	12.2325	10.2293	7.9639	10.1916	17.3247
GeneID:80742	PRR3	6.2237	3.4792	10.0064	7.4654	8.4521
GeneID:23	ABCF1	33.9827	69.5141	31.6584	39.3792	63.8481
GeneID:5514	PPP1R10	13.6475	20.8477	23.3153	14.124	15.7345
GeneID:28973	MRPS18B	67.243	36.1885	75.7619	65.8736	80.8639
GeneID:221545	C6orf136	6.8995	7.7262	7.4206	12.5179	16.9792
GeneID:8449	DHX16	15.1207	15.7245	15.6208	22.7889	23.3507
GeneID:11270	NRM	24.728	24.6282	26.2948	13.1202	30.5915
GeneID:9656	MDC1	17.4003	20.9343	12.4951	10.5452	26.8126
GeneID:203068	TUBB	815.865	1199.04	651.926	476.163	1164.03
GeneID:10211	FLOT1	83.5093	48.2112	59.7581	98.3716	115.861
GeneID:2968	GTF2H4	14.688	26.2741	18.1486	21.2148	31.9108
GeneID:57176	VARS2	15.6583	18.2591	9.9942	27.2565	18.7742
GeneID:54535	CCHCR1	13.1501	19.2656	13.2496	7.7029	15.7383
GeneID:100507436	MICA	4.6127	6.9138	10.1866	16.7486	8.3887
GeneID:4277	MICB	9.0137	10.0439	8.3547	9.7382	16.0021
GeneID:7919	DDX39B	148.519	234.538	152.604	154.658	155.356
GeneID:100532737	NA	131.933	208.746	138.584	138.944	137.12
GeneID:4795	NFKBIL1	13.3179	6.7158	16.6754	12.369	17.8197
GeneID:7916	PRRC2A	67.4648	98.1092	51.3883	53.0472	97.5118
GeneID:7917	BAG6	76.4968	89.5525	63.7514	124.575	124.5
GeneID:7918	GPANK1	13.5671	13.8217	15.4746	14.2045	28.6675
GeneID:1460	CSNK2B	177.234	134.58	142.625	198.831	396.989
GeneID:58496	LY6G5B	22.8559	15.6227	16.8182	15.3524	24.2474
GeneID:100532732	NA	12.5509	5.5955	12.9364	7.5509	22.1359
GeneID:401251	C6orf26	9.2975	4.3591	9.7204	8.3873	16.1251
GeneID:57819	LSM2	58.9405	70.4293	37.9018	50.4629	101.612
GeneID:10919	EHMT2	22.5021	72.4732	21.6687	22.2457	32.2791
GeneID:7936	RDBP	30.653	42.523	48.5352	32.9546	60.5661
GeneID:6499	SKIV2L	20.8846	19.3417	18.0005	25.0027	28.2809
GeneID:1797	DOM3Z	14.6918	10.1899	13.5299	17.5995	19.3504
GeneID:8859	STK19	9.4059	8.739	13.9436	12.006	18.1043
GeneID:10554	AGPAT1	26.2607	70.9724	34.1552	74.0792	84.9056
GeneID:6048	RNF5	42.2737	39.5758	43.2852	75.1622	84.8446
GeneID:177	NA	11.3564	6.0404	3.8793	6.0296	6.6977
GeneID:5089	PBX2	33.2493	52.9043	20.386	42.3392	49.0991
GeneID:6891	TAP2	22.6546	6.2922	19.2859	7.5262	10.4322
GeneID:6046	BRD2	69.8644	44.9957	54.1999	51.1999	45.1846
GeneID:6257	RXRB	24.0847	9.3367	27.1487	22.3222	19.8957
GeneID:7922	SLC39A7	50.3832	76.9445	54.593	124.037	83.6544
GeneID:7923	HSD17B8	16.7019	4.3115	13.3484	9.5203	11.6297
GeneID:6015	RING1	26.8515	21.6314	25.3539	34.2434	40.8466
GeneID:6293	VPS52	15.6202	16.6017	21.7694	19.9068	28.3216
GeneID:6222	RPS18	1746.67	688.809	1300.04	881.988	1061.67
GeneID:9277	WDR46	24.051	35.1207	18.7132	27.979	33.5238
GeneID:10471	PFDN6	49.0294	63.1303	38.6539	44.0186	95.4333
GeneID:5863	RGL2	10.8404	21.5007	18.3813	18.8806	23.8473
GeneID:9278	ZBTB22	10.0958	6.6283	6.21	7.3647	7.5357
GeneID:1616	DAXX	36.0943	47.9342	33.0892	24.7547	46.5622
GeneID:3833	KIFC1	28.3615	35.0875	39.2243	13.0488	43.5417
GeneID:5252	PHF1	19.5753	24.166	25.0744	28.5536	25.5849
GeneID:51596	CUTA	112.844	106.6	88.9809	88.2361	144.643
GeneID:221504	ZBTB9	6.4225	19.4212	6.3355	7.1021	10.1334
GeneID:578	BAK1	21.4237	18.8923	6.8465	10.2551	14.3078
GeneID:84300	C6orf125	42.1158	79.3755	58.3519	77.1818	101.295
GeneID:221496	LEMD2	12.7149	20.1085	15.6147	24.8145	16.9542
GeneID:11165	NUDT3	17.0587	16.1537	13.7399	19.3268	30.6779
GeneID:100529239	RPS10-NUDT3	103.71	92.8387	114.629	104.083	111.462
GeneID:6204	RPS10	246.829	226.371	294.051	245.081	240.134
GeneID:64771	C6orf106	69.7237	39.9454	33.3757	65.5938	52.011
GeneID:6631	NA	49.0619	62.0892	48.944	68.3292	105.177
GeneID:54887	UHRF1BP1	5.9427	5.7584	7.7147	18.1274	12.437
GeneID:6882	TAF11	27.9503	26.6036	24.3724	25.2789	31.8207
GeneID:7629	ZNF76	17.203	12.3107	11.1548	8.9654	8.9156
GeneID:5467	PPARD	6.9754	8.7096	5.1153	9.2093	9.7265
GeneID:2178	FANCE	3.0638	10.8108	8.3279	3.9948	10.6734
GeneID:4736	RPL10A	1122.38	610.222	983.245	797.641	601.778
GeneID:2289	FKBP5	11.0829	7.4731	4.8551	4.8311	16.9959
GeneID:6732	NA	20.9177	20.5986	33.0147	44.8598	39.8842
GeneID:1432	MAPK14	15.4592	11.3527	20.9375	30.4458	15.7976
GeneID:11329	STK38	11.7571	8.603	10.3605	12.8076	13.0741
GeneID:6428	SRSF3	88.5363	83.6033	53.7462	50.5828	88.6884
GeneID:51645	PPIL1	20.7974	36.542	23.0278	49.2593	54.578
GeneID:23787	MTCH1	73.8155	139.509	92.2368	82.4768	96.4898
GeneID:55633	TBC1D22B	6.9155	9.0238	5.3793	10.1451	11.1515
GeneID:9025	RNF8	4.1326	7.222	5.577	6.9593	4.8171
GeneID:23070	FTSJD2	35.983	16.9951	15.2475	20.4465	24.0885
GeneID:60685	ZFAND3	32.6266	23.1805	14.7092	55.1839	28.4209
GeneID:2739	GLO1	68.5938	50.8926	104.928	97.0782	108.548
GeneID:55776	C6orf64	2.839	3.4624	4.401	4.1868	6.2984
GeneID:221443	C6orf130	28.9494	20.8394	25.454	24.9618	28.2903
GeneID:4800	NFYA	11.5659	9.9516	8.5189	9.6455	9.0175
GeneID:100188893	TOMM6	131.297	101.634	107.646	139.002	261.654
GeneID:25862	USP49	1.76	4.1977	2.2088	1.2877	1.9468
GeneID:9477	MED20	6.942	15.4188	8.401	11.2163	17.0153
GeneID:705	BYSL	13.7493	25.0665	19.3983	24.319	29.2782
[truncated: 4,275 more rows]

## Sheet: Table S3
TFBS enrichment analysis
ESC							MEF
matrixID	(-1)*Log10(pValue)	TF	family	RPKM			matrixID	(-1)*Log10(pValue)	TF	family	RPKM
MA0039.4	307.653	Klf4	Three-zinc finger Kruppel-related	33.7604			MA1101.2	307.653	Bach2	Jun-related	0.8123
MA0003.4	307.653	Tfap2a	AP-2	0.2473			MA0089.2	307.653	Mafg	Maf-related::Jun-related	19.8793
MA0872.1	307.653	Tfap2a	AP-2	0.2473			MA0496.3	307.653	Mafk	Maf-related	15.4562
MA1102.2	307.653	Ctcfl	More than 3 adjacent zinc fingers	1.1551			MA0591.1	307.653	Bach1	Jun-related::Maf-related	11.3713
MA1122.1	307.653	Tfdp1	E2F	56.1173			MA0841.1	307.653	Nfe2	Jun-related	0.0129
MA1107.2	307.653	Klf9	Three-zinc finger Kruppel-related	23.4798			MA0655.1	307.653	Jdp2	Fos-related	40.0694
MA1515.1	307.653	Klf2	Three-zinc finger Kruppel-related	34.2369			MA0491.2	292.991	Jund	Jun-related	30.6207
MA1511.2	307.653	Klf10	Three-zinc finger Kruppel-related	18.036			MA1141.1	289.229	Fos	Fos-related::Jun-related	1.8993
MA1512.1	307.653	Klf11	Three-zinc finger Kruppel-related	7.9549			MA0150.2	280.724	Nfe2l2	Jun-related	26.2706
MA1516.1	307.653	Klf3	Three-zinc finger Kruppel-related	14.9805			MA1134.1	264.203	Fos	Fos-related::Jun-related	1.8993
MA1522.1	307.653	Maz	More than 3 adjacent zinc fingers	55.0453			MA0501.1	251.135	Maf	Maf-related::Jun-related	3.9771
MA1513.1	307.653	Klf15	Three-zinc finger Kruppel-related	0.9185			MA0490.2	218.317	Junb	Jun-related	44.7354
MA1548.1	307.653	Plagl2	More than 3 adjacent zinc fingers	3.0748			MA0659.3	213.141	Mafg	Maf-related	19.8793
MA1578.1	307.653	Vezf1	More than 3 adjacent zinc fingers	6.2406			MA0477.2	204.634	Fosl1	Fos-related	4.0293
MA1584.1	307.653	Zic5	More than 3 adjacent zinc fingers	5.7991			MA0697.2	183.818	Zic3	More than 3 adjacent zinc fingers	0.1789
MA1629.1	307.653	Zic2	More than 3 adjacent zinc fingers	14.1916			MA1928.1	169.288	Bnc2	Factors with multiple dispersed zinc fingers	2.8012
MA1650.1	307.653	Zbtb14	More than 3 adjacent zinc fingers	4.0147			MA0489.2	168.09	Jun	Jun-related	40.3184
MA1959.1	307.653	Klf7	Three-zinc finger Kruppel-related	0.727			MA1528.1	161.258	Nfix	Nuclear factor 1	18.7907
MA1961.1	307.653	Patz1	Factors with multiple dispersed zinc fingers	17.113			MA1513.1	159.646	Klf15	Three-zinc finger Kruppel-related	0.2727
MA0079.5	307.653	Sp1	Three-zinc finger Kruppel-related	19.6417			MA1527.1	159.413	Nfic	Nuclear factor 1	22.8725
MA0131.2	307.653	Hinfp	Factors with multiple dispersed zinc fingers	6.0996			MA1144.1	156.896	Fosl2	Fos-related::Jun-related	25.5437
MA0471.2	307.653	E2f6	E2F	7.038			MA1629.1	150.812	Zic2	More than 3 adjacent zinc fingers	0.2719
MA0146.2	307.653	Zfx	More than 3 adjacent zinc fingers	4.7535			MA1128.1	147.159	Fosl1	Fos-related::Jun-related	4.0293
MA0155.1	307.653	Insm1	Factors with multiple dispersed zinc fingers	0.1191			MA1650.1	146.352	Zbtb14	More than 3 adjacent zinc fingers	3.9417
MA0162.4	307.653	Egr1	Three-zinc finger Kruppel-related	0.1197			MA0146.2	143.223	Zfx	More than 3 adjacent zinc fingers	6.9363
MA0524.2	307.653	Tfap2c	AP-2	35.2499			MA0742.2	137.238	Klf12	Three-zinc finger Kruppel-related	1.2925
MA0516.3	307.653	Sp2	Three-zinc finger Kruppel-related	13.9563			MA1137.1	135.189	Fosl1	Fos-related::Jun-related	4.0293
MA0504.1	307.653	Nr2c2	RXR-related receptors (NR2)	3.0267			MA1122.1	134.312	Tfdp1	E2F	71.8881
MA0685.2	307.653	Sp4	Three-zinc finger Kruppel-related	1.2651			MA1643.1	128.852	Nfib	Nuclear factor 1	2.9573
MA0697.2	307.653	Zic3	More than 3 adjacent zinc fingers	8.8116			MA1615.1	126.692	Plagl1	More than 3 adjacent zinc fingers	5.3908
MA0696.1	307.653	Zic1	More than 3 adjacent zinc fingers	0.021			MA1516.1	120.501	Klf3	Three-zinc finger Kruppel-related	19.7843
MA0741.1	307.653	Klf16	Three-zinc finger Kruppel-related	9.642			MA1959.1	117.939	Klf7	Three-zinc finger Kruppel-related	5.9119
MA0742.2	307.653	Klf12	Three-zinc finger Kruppel-related	0.9673			MA1628.1	107.452	Zic1	More than 3 adjacent zinc fingers	2.2401
MA0746.2	307.653	Sp3	Three-zinc finger Kruppel-related	18.8316			MA1099.2	107.373	Hes1	Hairy-related factors	39.6764
MA0810.1	307.653	Tfap2a	AP-2	0.2473			MA0462.2	106.625	Batf	B-ATF-related factors::Jun-related	0.3569
MA0830.2	307.653	Tcf4	E2A	3.0265			MA1583.1	105.442	Zfp57	Factors with multiple dispersed zinc fingers	9.0425
MA0814.2	307.653	Tfap2c	AP-2	35.2499			MA1961.1	105.132	Patz1	Factors with multiple dispersed zinc fingers	7.2709
MA0815.1	307.653	Tfap2c	AP-2	35.2499			MA1135.1	102.618	Fosb	Fos-related::Jun-related	1.18
MA1615.1	307.649	Plagl1	More than 3 adjacent zinc fingers	6.014			MA1634.1	102.566	Batf	B-ATF-related factors	0.3569
MA1514.1	299.002	Klf17	Three-zinc finger Kruppel-related	0.3249			MA1511.2	102.355	Klf10	Three-zinc finger Kruppel-related	7.5162
MA1581.1	295.894	Zbtb6	More than 3 adjacent zinc fingers	2.6351			MA1130.1	100.597	Fosl2	Fos-related::Jun-related	25.5437
MA1966.1	291.375	Tfap4	bHLH-ZIP::Ets-related	8.5711			MA0696.1	99.675	Zic1	More than 3 adjacent zinc fingers	2.2401
MA1945.1	289.13	Etv5	Ets-related::Tal-related	46.6209			MA0516.3	96.7882	Sp2	Three-zinc finger Kruppel-related	6.8663
MA0750.2	277.436	Zbtb7a	More than 3 adjacent zinc fingers	3.571			MA1138.1	95.3602	Fosl2	Fos-related::Jun-related	25.5437
MA1628.1	276.127	Zic1	More than 3 adjacent zinc fingers	0.021			MA0079.5	90.8441	Sp1	Three-zinc finger Kruppel-related	8.2125
MA1517.1	274.356	Klf6	Three-zinc finger Kruppel-related	4.5754			MA1584.1	90.0039	Zic5	More than 3 adjacent zinc fingers	0.1064
MA0145.2	269.172	Tfcp2l1	CP2-related factors	43.0935			MA0759.2	88.2055	Elk3	Ets-related	28.3164
MA0522.3	266.171	Tcf3	E2A	29.6677			MA0609.2	85.7442	Crem	CREB-related factors	1.529
MA0597.2	264.923	Thap1	THAP-related factors	4.9806			MA1475.1	83.3374	Creb3l4	CREB-related factors	0.2849
MA1648.1	264.493	Tcf12	E2A	8.2964			MA0597.2	81.7826	Thap1	THAP-related factors	4.7832
MA0759.2	261.812	Elk3	Ets-related	0.9693			MA0099.3	80.0518	Fos	Fos-related::Jun-related	1.8993
MA1723.1	248.459	Prdm9	Factors with multiple dispersed zinc fingers	0.2798			MA0039.4	79.2861	Klf4	Three-zinc finger Kruppel-related	14.6157
MA0014.3	239.903	Pax5	Paired domain only	0.028			MA0750.2	76.2761	Zbtb7a	More than 3 adjacent zinc fingers	11.1389
MA0592.3	236.748	Esrra	Steroid hormone receptors (NR3)	8.3772			MA0478.1	76.2694	Fosl2	Fos-related	25.5437
MA0736.1	226.754	Glis2	More than 3 adjacent zinc fingers	12.2858			MA0119.1	76.145	Nfic	Nuclear factor 1::NK	22.8725
MA1934.1	223.614	Erf	Ets-related::Tal-related	36.8865			MA0131.2	75.5311	Hinfp	Factors with multiple dispersed zinc fingers	4.4916
MA0649.1	221.678	Hey2	Hairy-related factors	0.0796			MA0154.4	73.3875	Ebf1	Early B-Cell Factor-related factors	5.0714
MA1583.1	211.787	Zfp57	Factors with multiple dispersed zinc fingers	44.8214			MA0746.2	71.3688	Sp3	Three-zinc finger Kruppel-related	16.3637
MA0734.3	210.087	Gli2	More than 3 adjacent zinc fingers	9.0625			MA0835.2	71.2907	Batf3	B-ATF-related factors	0.3135
MA0505.2	193.386	Nr5a2	FTZF1related(NR5A)	10.266			MA1106.1	70.6792	Hif1a	PAS domain factors	23.6178
MA0141.3	187.021	Esrrb	Steroid hormone receptors (NR3)	84.0555			MA0732.1	70.5777	Egr3	Three-zinc finger Kruppel-related	0.8066
MA0865.2	185.452	E2f8	E2F	7.4081			MA0155.1	70.4279	Insm1	Factors with multiple dispersed zinc fingers	0.0074
MA0028.2	183.41	Elk1	Ets-related	6.6588			MA0685.2	69.9742	Sp4	Three-zinc finger Kruppel-related	0.5479
MA0017.2	178.226	Nr2f1	RXR-related receptors (NR2)	0.0785			MA1132.1	69.5858	Jun	Jun-related	40.3184
MA1106.1	176.586	Hif1a	PAS domain factors	13.5787			MA0506.2	69.1568	Nrf1	Jun-related	5.1358
MA0778.1	169.003	Nfkb2	NF-kappaB-related factors	2.5474			MA1637.1	68.0767	Ebf3	Early B-Cell Factor-related factors	1.5242
MA1149.1	168.33	Rara	Thyroid hormone receptor-related factors (NR1)::RXR-related receptors (NR2)	9.0215			MA1521.1	67.2612	Mafa	Maf-related	0.1335
MA0694.1	165.603	Zbtb7b	More than 3 adjacent zinc fingers	4.2132			MA0816.1	63.9902	Ascl2	MyoD/ASC-related factors	0.0189
MA0695.1	164.958	Zbtb7c	More than 3 adjacent zinc fingers	1.7193			MA1522.1	62.811	Maz	More than 3 adjacent zinc fingers	52.1476
MA0764.3	159.852	Etv4	Ets-related	11.5229			MA1474.1	62.7131	Creb3l4	CREB-related factors	0.2849
MA1990.1	149.673	Gli1	More than 3 adjacent zinc fingers	1.9651			MA0632.2	62.1696	Tcfl5	PAS domain factors	5.9806
MA0139.1	149.583	Ctcf	More than 3 adjacent zinc fingers	33.0886			MA0741.1	59.732	Klf16	Three-zinc finger Kruppel-related	10.7144
MA0472.2	148.92	Egr2	Three-zinc finger Kruppel-related	0.0136			MA0162.4	59.4224	Egr1	Three-zinc finger Kruppel-related	19.2166
MA0823.1	144.367	Hey1	Hairy-related factors	0.5641			MA1140.2	59.2977	Junb	Jun-related	44.7354
MA0065.2	143.845	Pparg	Thyroid hormone receptor-related factors (NR1)::RXR-related receptors (NR2)	0.0085			MA0472.2	59.0482	Egr2	Three-zinc finger Kruppel-related	9.0468
MA1472.2	141.855	Bhlha15	Tal-related	0.4519			MA0259.1	58.1422	Arnt	PAS domain factors	12.3442
MA0816.1	139.968	Ascl2	MyoD/ASC-related factors	0.7981			MA1604.1	57.7957	Ebf2	Early B-Cell Factor-related factors	0.6062
MA1972.1	134.418	Zfp14	Factors with multiple dispersed zinc fingers	0.3981			MA0471.2	57.1605	E2f6	E2F	23.6224
MA0745.2	130.369	Snai2	More than 3 adjacent zinc fingers	0.195			MA1578.1	57.0315	Vezf1	More than 3 adjacent zinc fingers	14.0494
MA1537.1	129.636	Nr2f1	RXR-related receptors (NR2)	0.0785			MA1114.1	56.5647	Pbx3	TALE-type homeo domain factors	6.9742
MA0821.2	128.727	Hes5	Hairy-related factors	0.0113			MA1472.2	56.1051	Bhlha15	Tal-related	0.0227
MA0765.3	126.79	Etv5	Ets-related	46.6209			MA0765.3	55.3644	Etv5	Ets-related	9.9953
MA1604.1	126.282	Ebf2	Early B-Cell Factor-related factors	0.0215			MA2002.1	55.0448	Zfp335	Factors with multiple dispersed zinc fingers	8.3951
MA0259.1	124.867	Arnt	PAS domain factors	17.8514			MA0649.1	54.9808	Hey2	Hairy-related factors	2.8631
MA1541.1	120.274	Nr6a1	GCNF-related receptors (NR6)	10.2458			MA1548.1	52.3319	Plagl2	More than 3 adjacent zinc fingers	5.5428
MA0521.2	118.559	Tcf12	E2A	8.2964			MA1581.1	49.7341	Zbtb6	More than 3 adjacent zinc fingers	3.0194
MA1637.1	116.463	Ebf3	Early B-Cell Factor-related factors	0.0788			MA0615.1	49.5452	Gmeb1	GMEB	4.288
MA1099.2	116.338	Hes1	Hairy-related factors	10.927			MA1633.2	48.7321	Bach1	Jun-related	11.3713
MA0147.3	116.177	Myc	bHLH-ZIP	1.0507			MA0604.1	48.4968	Atf1	CREB-related factors	21.3516
MA0506.2	116.143	Nrf1	Jun-related	9.0119			MA0764.3	46.6982	Etv4	Ets-related	19.4182
MA0159.1	114.572	Rara	Thyroid hormone receptor-related factors (NR1)::RXR-related receptors (NR2)	9.0215			MA1515.1	46.4193	Klf2	Three-zinc finger Kruppel-related	10.1103
MA1635.1	111.367	Bhlhe22	Tal-related	0.0778			MA1966.1	44.8658	Tfap4	bHLH-ZIP::Ets-related	2.6876
MA0163.1	108.121	Plag1	More than 3 adjacent zinc fingers	0.7835			MA1107.2	43.7431	Klf9	Three-zinc finger Kruppel-related	8.874
MA0107.1	102.747	Rela	NF-kappaB-related factors	6.1705			MA0844.1	43.4494	Xbp1	XBP-1-related factors	46.0173
MA1550.1	102.535	Ppard	Thyroid hormone receptor-related factors (NR1)	6.1795			MA0823.1	43.4292	Hey1	Hairy-related factors	5.3774
MA0076.2	99.5333	Elk4	Ets-related	1.0596			MA0028.2	43.2036	Elk1	Ets-related	8.334
MA1992.1	93.644	Ikzf3	Three-zinc finger Kruppel-related	0.0207			MA1995.1	41.8514	Npas4	PAS domain factors	1.4457
MA0591.1	92.3543	Bach1	Jun-related::Maf-related	7.9317			MA1951.1	41.6235	Fos	Fos-related	1.8993
MA1652.1	91.7523	Zkscan5	Factors with multiple dispersed zinc fingers	5.541			MA1988.1	39.7291	Atf3	Fos-related	2.7276
MA1559.1	88.9905	Snai3	More than 3 adjacent zinc fingers	0.5038			MA1635.1	38.8878	Bhlhe22	Tal-related	0.3041
MA0104.4	88.8514	Mycn	bHLH-ZIP	15.1999			MA1512.1	38.0657	Klf11	Three-zinc finger Kruppel-related	1.573
MA1967.1	88.3936	Tfap4	bHLH-ZIP::Ets-related	8.5711			MA0527.1	37.3234	Zbtb33	Other factors with up to three adjacent zinc fingers	4.5151
MA0024.3	86.9305	E2f1	E2F	19.5229			MA0736.1	37.0844	Glis2	More than 3 adjacent zinc fingers	14.5826
MA0632.2	85.9974	Tcfl5	PAS domain factors	11.4695			MA1517.1	36.7573	Klf6	Three-zinc finger Kruppel-related	48.9045
MA0154.4	83.7187	Ebf1	Early B-Cell Factor-related factors	0.3331			MA0145.2	36.694	Tfcp2l1	CP2-related factors	0.0138
MA1560.1	82.924	Sohlh2	PAS domain factors	41.7069			MA1121.1	36.3808	Tead2	TEF-1-related factors	35.7867
MA0470.2	81.8089	E2f4	E2F	48.6328			MA0521.2	35.4051	Tcf12	E2A	24.6638
MA0496.3	78.9859	Mafk	Maf-related	2.368			MA0830.2	35.4038	Tcf4	E2A	10.6223
MA0657.1	75.1703	Klf13	Three-zinc finger Kruppel-related	8.2188			MA1464.1	35.1342	Arnt2	PAS domain factors	1.7079
MA0730.1	74.5838	Rara	Thyroid hormone receptor-related factors (NR1)	9.0215			MA1967.1	34.0842	Tfap4	bHLH-ZIP::Ets-related	2.6876
MA0641.1	72.9422	Elf4	Ets-related	2.6195			MA0104.4	34.062	Mycn	bHLH-ZIP	0.287
MA2002.1	70.1013	Zfp335	Factors with multiple dispersed zinc fingers	5.4453			MA1466.1	33.7863	Atf6	Jun-related	9.4434
MA1997.1	70.0345	Olig2	Tal-related	3.0907			MA0476.1	33.1104	Fos	Fos-related	1.8993
MA0803.1	67.3053	Tbx15	TBX1-related factors	0.159			MA1520.1	31.2179	Maf	Maf-related	3.9771
MA0512.2	65.9896	Rxra	RXR-related receptors (NR2)	2.3868			MA1938.1	29.9015	Erf	Ets-related::Tal-related	24.2775
MA0527.1	65.542	Zbtb33	Other factors with up to three adjacent zinc fingers	1.9348			MA0839.1	28.9351	Creb3l1	CREB-related factors	81.9035
MA0103.3	64.1864	Zeb1	HD-ZF factors	5.5869			MA0734.3	28.6823	Gli2	More than 3 adjacent zinc fingers	1.6256
MA0677.1	63.8184	Nr2f6	RXR-related receptors (NR2)	2.9832			MA0006.1	27.9272	Ahr	PAS domain factors	1.9892
MA0633.2	63.7062	Twist2	Tal-related	0.0724			MA0834.1	27.4574	Atf7	Jun-related	5.5283
MA0105.4	62.4638	Nfkb1	NF-kappaB-related factors	7.2188			MA0656.1	27.123	Jdp2	Fos-related	40.0694
MA0748.2	61.7139	Yy2	More than 3 adjacent zinc fingers	3.0714			MA1945.1	26.9928	Etv5	Ets-related::Tal-related	9.9953
MA0073.1	61.0535	Rreb1	Factors with multiple dispersed zinc fingers	2.0834			MA0161.2	26.9246	Nfic	Nuclear factor 1	22.8725
MA1933.1	59.8687	Elk1	Ets-related::bHLH-ZIP	6.6588			MA0466.3	26.9098	Cebpb	CEBP-related	22.974
MA0101.1	59.0018	Rel	NF-kappaB-related factors	0.4819			MA0107.1	26.1967	Rela	NF-kappaB-related factors	26.4326
MA0864.2	58.506	E2f2	E2F	1.7174			MA1143.1	26.0469	Fosl1	Fos-related::Jun-related	4.0293
MA0825.1	58.1314	Mnt	bHLH-ZIP	7.1821			MA0695.1	25.9928	Zbtb7c	More than 3 adjacent zinc fingers	0.3965
MA0058.3	56.0284	Max	bHLH-ZIP	23.7323			MA0522.3	25.8112	Tcf3	E2A	30.4211
MA0112.3	55.9239	Esr1	Steroid hormone receptors (NR3)	0.0126			MA0779.1	25.6132	Pax1	Paired domain only	1.1327
MA0004.1	55.8256	Arnt	PAS domain factors	17.8514			MA0633.2	25.1743	Twist2	Tal-related	66.5658
MA0622.1	54.8257	Mlxip	bHLH-ZIP	2.4008			MA0090.3	24.9916	Tead1	TEF-1-related factors	36.4209
MA0615.1	54.1753	Gmeb1	GMEB	4.4613			MA0865.2	24.7885	E2f8	E2F	6.9347
MA0659.3	50.4804	Mafg	Maf-related	17.5521			MA1997.1	24.667	Olig2	Tal-related	0.0029
MA1521.1	49.7512	Mafa	Maf-related	1.475			MA0163.1	24.6038	Plag1	More than 3 adjacent zinc fingers	0.6783
MA0150.2	48.7799	Nfe2l2	Jun-related	24.4852			MA0638.1	23.4939	Creb3	CREB-related factors	42.5663
MA1528.1	48.5228	Nfix	Nuclear factor 1	0.4807			MA1493.1	22.8576	Hes6	Hairy-related factors	7.3586
MA0665.1	48.3107	Msc	Tal-related	3.1711			MA1648.1	21.5476	Tcf12	E2A	24.6638
MA0473.3	45.8339	Elf1	Ets-related	2.4046			MA1145.1	20.9641	Fosl2	Fos-related::Jun-related	25.5437
MA1491.2	45.8007	Gli3	More than 3 adjacent zinc fingers	1.1988			MA1934.1	20.2868	Erf	Ets-related::Tal-related	24.2775
MA0599.1	45.6811	Klf5	Three-zinc finger Kruppel-related	31.2358			MA1990.1	20.1816	Gli1	More than 3 adjacent zinc fingers	0.1
MA1938.1	44.9418	Erf	Ets-related::Tal-related	36.8865			MA0511.2	20.1106	Runx2	Runt-related factors	3.2704
MA1464.1	43.8327	Arnt2	PAS domain factors	0.6536			MA0147.3	19.7272	Myc	bHLH-ZIP	33.5803
MA0855.1	43.4182	Rxrb	RXR-related receptors (NR2)	10.1232			MA0605.2	19.3848	Atf3	Fos-related	2.7276
MA1531.1	42.1731	Nr1d1	Thyroid hormone receptor-related factors (NR1)	1.2388			MA0024.3	19.0342	E2f1	E2F	12.8921
MA1147.1	40.3947	Nr4a2	NGFI-B-related receptors (NR4)::RXR-related receptors (NR2)	0.1904			MA0504.1	18.9422	Nr2c2	RXR-related receptors (NR2)	3.0603
MA0860.1	36.6567	Rarg	Thyroid hormone receptor-related factors (NR1)	19.9466			MA0665.1	18.101	Msc	Tal-related	0.0047
MA1114.1	36.0671	Pbx3	TALE-type homeo domain factors	2.4895			MA0798.3	18.0377	Rfx3	RFX-related factors	0.3825
MA1527.1	34.4852	Nfic	Nuclear factor 1	3.4262			MA0871.2	17.3568	Tfec	bHLH-ZIP	1.289
MA0645.1	33.1501	Etv6	Ets-related	5.3554			MA0782.2	17.0069	Pknox1	TALE-type homeo domain factors	4.7783
MA0142.1	33.1325	Pou5f1	POU domain factors::SOX-related factors	393.847			MA0781.1	16.9295	Pax9	Paired domain only	0.3897
MA0006.1	33.0682	Ahr	PAS domain factors	0.7691			MA0603.1	15.7628	Arntl	PAS domain factors	13.5886
MA0760.1	32.9371	Erf	Ets-related	36.8865			MA1933.1	15.5977	Elk1	Ets-related::bHLH-ZIP	8.334
MA1474.1	32.8684	Creb3l4	CREB-related factors	0.5147			MA0470.2	14.3487	E2f4	E2F	34.7782
MA1493.1	32.5502	Hes6	Hairy-related factors	3.7843			MA0076.2	14.0265	Elk4	Ets-related	2.9327
MA0056.2	31.9353	Mzf1	More than 3 adjacent zinc fingers	0.341			MA0778.1	13.9681	Nfkb2	NF-kappaB-related factors	16.2182
MA0858.1	31.9032	Rarb	Thyroid hormone receptor-related factors (NR1)	1.018			MA1723.1	13.8388	Prdm9	Factors with multiple dispersed zinc fingers	0.4475
MA1973.1	31.254	Zkscan3	More than 3 adjacent zinc fingers	3.9582			MA0139.1	12.8753	Ctcf	More than 3 adjacent zinc fingers	16.6941
MA1555.1	31.2118	Rxrb	RXR-related receptors (NR2)	10.1232			MA1139.1	12.496	Fosl2	Fos-related::Jun-related	25.5437
MA1567.2	30.6387	Tbx6	TBX6-related factors	0.0884			MA0864.2	12.3476	E2f2	E2F	0.8069
MA1557.1	30.3717	Smad5	SMAD factors	4.1497			MA1964.1	11.8475	Smad2	SMAD factors	6.0781
MA0098.3	30.3423	Ets1	Ets-related	0.3481			MA0657.1	11.4598	Klf13	Three-zinc finger Kruppel-related	11.9084
MA1538.1	29.7961	Nr2f1	RXR-related receptors (NR2)	0.0785			MA0509.3	11.4417	Rfx1	RFX-related factors	4.868
MA1117.1	29.7789	Relb	NF-kappaB-related factors	3.0723			MA0510.2	10.2684	Rfx5	RFX-related factors	3.9202
MA0691.1	29.2333	Tfap4	bHLH-ZIP	8.5711			MA1531.1	10.0811	Nr1d1	Thyroid hormone receptor-related factors (NR1)	11.7147
MA1542.1	28.8304	Osr1	Other factors with up to three adjacent zinc fingers	0.015			MA0691.1	9.88698	Tfap4	bHLH-ZIP	2.6876
MA1552.1	28.1153	Rarb	Thyroid hormone receptor-related factors (NR1)	1.018			MA0641.1	9.69593	Elf4	Ets-related	9.578
MA1964.1	28.0579	Smad2	SMAD factors	5.6576			MA1133.1	9.11209	Jun	Jun-related	40.3184
MA0475.2	27.5802	Fli1	Ets-related	0.0174			MA0526.4	8.90364	Usf2	bHLH-ZIP	19.1557
MA0062.3	27.0134	Gabpa	Ets-related	25.8312			MA1536.1	8.72902	Nr2c2	RXR-related receptors (NR2)	3.0603
MA0761.2	26.7669	Etv1	Ets-related	2.0377			MA0636.1	8.47964	Bhlhe41	Hairy-related factors	1.0445
MA1484.1	25.6988	Ets2	Ets-related	5.2271			MA0608.1	8.37726	Creb3l2	CREB-related factors	18.454
MA0871.2	25.6745	Tfec	bHLH-ZIP	0.0079			MA0595.1	8.28834	Srebf1	bHLH-ZIP	20.4857
MA0074.1	24.7832	Rxra	RXR-related receptors (NR2)::Thyroid hormone receptor-related factors (NR1)	2.3868			MA1652.1	7.96742	Zkscan5	Factors with multiple dispersed zinc fingers	2.3298
MA1539.1	24.4674	Nr2f6	RXR-related receptors (NR2)	2.9832			MA0004.1	7.93262	Arnt	PAS domain factors	12.3442
MA0464.2	24.4162	Bhlhe40	Hairy-related factors	7.8718			MA0101.1	7.60397	Rel	NF-kappaB-related factors	1.3311
MA0494.1	22.7639	Nr1h3	Thyroid hormone receptor-related factors (NR1)::RXR-related receptors (NR2)	0.1192			MA1127.1	7.58095	Fosb	Fos-related::Jun-related	1.18
MA0595.1	21.8302	Srebf1	bHLH-ZIP	10.4551			MA0825.1	7.36153	Mnt	bHLH-ZIP	6.3998
MA0640.2	21.707	Elf3	Ets-related	29.7913			MA1126.1	6.75938	Fos	Fos-related::Jun-related	1.8993
MA0511.2	21.1024	Runx2	Runt-related factors	0.0191			MA0599.1	6.66469	Klf5	Three-zinc finger Kruppel-related	3.3566
MA0636.1	20.6885	Bhlhe41	Hairy-related factors	0.043			MA0473.3	6.52182	Elf1	Ets-related	8.7145
MA0758.1	20.5782	E2f7	E2F	2.9603			MA0058.3	6.27448	Max	bHLH-ZIP	33.5614
MA1111.1	20.3403	Nr2f2	RXR-related receptors (NR2)	0.0325			MA1972.1	6.0422	Zfp14	Factors with multiple dispersed zinc fingers	0.49
MA0737.1	20.285	Glis3	More than 3 adjacent zinc fingers	0.2973			MA1131.1	5.64647	Fosl2	Fos-related::Jun-related	25.5437
MA1565.1	20.0472	Tbx18	TBX1-related factors	0.0755			MA1484.1	5.35847	Ets2	Ets-related	15.1515
MA1647.2	19.9591	Prdm4	Factors with multiple dispersed zinc fingers	9.7042			MA0464.2	5.28774	Bhlhe40	Hairy-related factors	25.2485
MA0089.2	19.3808	Mafg	Maf-related::Jun-related	17.5521			MA0840.1	5.18264	Creb5	CREB-related factors	1.0175
MA1962.1	19.3048	Pou2f1	POU domain factors::SOX-related factors	3.4713			MA1969.1	4.85057	Thra	Thyroid hormone receptor-related factors (NR1)	5.7142
MA0763.1	18.7688	Etv3	Ets-related	4.0761			MA0498.2	4.79703	Meis1	TALE-type homeo domain factors	8.1317
MA0161.2	18.6751	Nfic	Nuclear factor 1	3.4262			MA0737.1	4.50649	Glis3	More than 3 adjacent zinc fingers	3.456
MA1643.1	18.6429	Nfib	Nuclear factor 1	1.328			MA0863.1	4.46192	Mtf1	More than 3 adjacent zinc fingers	2.7703
MA1649.1	17.9038	Zbtb12	More than 3 adjacent zinc fingers	6.8596			MA0735.1	4.36247	Glis1	More than 3 adjacent zinc fingers	1.6479
MA1532.2	17.6307	Nr1d2	Thyroid hormone receptor-related factors (NR1)	2.6314			MA1149.1	4.27649	Rara	Thyroid hormone receptor-related factors (NR1)::RXR-related receptors (NR2)	10.8355
MA1520.1	17.4335	Maf	Maf-related	0.0059			MA1500.1	4.10782	Hoxb6	HOX	10.1436
MA1939.1	17.2515	Erf	Ets-related::bHLH-ZIP	36.8865			MA1957.1	4.0894	Hoxb2	HOX::Ets-related	11.1835
MA0066.1	17.0702	Pparg	Thyroid hormone receptor-related factors (NR1)	0.0085			MA1931.1	4.07605	Elk1	Ets-related::HOX-related factors	8.334
MA1553.1	16.2475	Rarg	Thyroid hormone receptor-related factors (NR1)	19.9466			MA0059.1	4.06571	Max	bHLH-ZIP	33.5614
MA1995.1	16.1206	Npas4	PAS domain factors	0.0082			MA0760.1	3.90257	Erf	Ets-related	24.2775
MA0735.1	16.1107	Glis1	More than 3 adjacent zinc fingers	0.1092			MA0723.2	3.89898	Vax2	NK	3.4111
MA1483.2	16.057	Elf2	Ets-related	5.7117			MA0761.2	3.8679	Etv1	Ets-related	0.6168
MA0603.1	15.578	Arntl	PAS domain factors	4.9812			MA0809.2	3.81928	Tead4	TEF-1-related factors	2.5278
MA0608.1	14.9535	Creb3l2	CREB-related factors	1.2837			MA0850.1	3.7931	Foxp3	FOX	0.0059
MA0598.3	14.8932	Ehf	Ets-related	0.013			MA0103.3	3.71414	Zeb1	HD-ZF factors	12.5262
MA0501.1	14.2103	Maf	Maf-related::Jun-related	0.0059			MA0645.1	3.61767	Etv6	Ets-related	15.0189
MA0489.2	14.1499	Jun	Jun-related	1.1869			MA0622.1	3.42822	Mlxip	bHLH-ZIP	5.2812
MA0059.1	13.9871	Max	bHLH-ZIP	23.7323			MA0739.1	3.41781	Hic1	Factors with multiple dispersed zinc fingers	15.8563
MA1954.1	13.6239	Foxo1	FOX::Ets-related	2.642			MA0062.3	3.3224	Gabpa	Ets-related	13.8479
MA1930.1	13.0056	Ctcf	More than 3 adjacent zinc fingers	33.0886			MA0694.1	3.2849	Zbtb7b	More than 3 adjacent zinc fingers	16.4521
MA1558.1	12.6229	Snai1	More than 3 adjacent zinc fingers	0.7083			MA0671.1	3.27012	Nfix	Nuclear factor 1	18.7907
MA1929.1	12.4271	Ctcf	More than 3 adjacent zinc fingers	33.0886			MA1136.1	3.2147	Fosb	Fos-related::Jun-related	1.18
MA0119.1	11.3378	Nfic	Nuclear factor 1::NK	3.4262			MA0738.1	3.20122	Hic2	Factors with multiple dispersed zinc fingers	0.6701
MA0739.1	11.3314	Hic1	Factors with multiple dispersed zinc fingers	0.29			MA0098.3	3.04945	Ets1	Ets-related	23.7774
MA1466.1	11.2845	Atf6	Jun-related	5.1854			MA0600.2	3.04228	Rfx2	RFX-related factors	0.3311
MA1616.1	11.0402	Prdm15	Factors with multiple dispersed zinc fingers	2.3277			MA0692.1	2.68044	Tfeb	bHLH-ZIP	1.5173
MA0502.2	10.9897	Nfyb	Heteromeric CCAAT-binding	33.3772			MA0831.3	2.63249	Tfe3	bHLH-ZIP	14.1618
MA0805.1	10.8751	Tbx1	TBX1-related factors	0.0632			MA0002.2	2.61892	Runx1	Runt-related factors	8.7794
MA1969.1	10.585	Thra	Thyroid hormone receptor-related factors (NR1)	2.1744			MA0065.2	2.61416	Pparg	Thyroid hormone receptor-related factors (NR1)::RXR-related receptors (NR2)	1.6653
MA1646.1	10.4378	Osr2	More than 3 adjacent zinc fingers	1.6528			MA1929.1	2.58946	Ctcf	More than 3 adjacent zinc fingers	16.6941
MA0478.1	10.2846	Fosl2	Fos-related	0.3579			MA1496.1	2.56759	Hoxa4	HOX	1.1273
MA0776.1	10.234	Mybl1	Myb/SANT domain factors	2.2887			MA0803.1	2.55489	Tbx15	TBX1-related factors	22.8889
MA0807.1	10.1018	Tbx5	TBX2-related factors	0.016			MA0159.1	2.37405	Rara	Thyroid hormone receptor-related factors (NR1)::RXR-related receptors (NR2)	10.8355
MA1996.1	9.81615	Nr1h2	Thyroid hormone receptor-related factors (NR1)	20.2387			MA0748.2	2.34242	Yy2	More than 3 adjacent zinc fingers	2.9006
MA1105.2	8.96971	Grhl2	Grainyhead-related factors	1.574			MA1930.1	2.32317	Ctcf	More than 3 adjacent zinc fingers	16.6941
MA0609.2	8.51887	Crem	CREB-related factors	0.9966			MA0801.1	2.19608	Mga	TBX6-related factors	3.8375
MA1536.1	8.367	Nr2c2	RXR-related receptors (NR2)	3.0267			MA1939.1	2.17791	Erf	Ets-related::bHLH-ZIP	24.2775
MA0782.2	8.34491	Pknox1	TALE-type homeo domain factors	5.7065			MA1142.1	2.17192	Fosl1	Fos-related::Jun-related	4.0293
MA0839.1	8.27165	Creb3l1	CREB-related factors	1.5696			MA0806.1	2.1445	Tbx4	TBX2-related factors	0.8274
MA1968.1	7.09808	Tfcp2	CP2-related factors	4.2222			MA1555.1	2.13587	Rxrb	RXR-related receptors (NR2)	11.4509
MA0071.1	6.94893	Rora	Thyroid hormone receptor-related factors (NR1)	0.0842			MA0475.2	2.03176	Fli1	Ets-related	2.9095
MA1928.1	6.94362	Bnc2	Factors with multiple dispersed zinc fingers	0.8758			MA0758.1	1.99097	E2f7	E2F	4.1147
MA1508.1	6.91042	Ikzf1	Factors with multiple dispersed zinc fingers	0.1801			MA0775.1	1.98512	Meis3	TALE-type homeo domain factors	10.2711
MA1566.2	6.82553	Tbx3	TBX2-related factors	22.3608			MA1535.1	1.98181	Nr2c1	RXR-related receptors (NR2)	3.7859
MA0596.1	6.70818	Srebf2	bHLH-ZIP	48.5707			MA1552.1	1.93904	Rarb	Thyroid hormone receptor-related factors (NR1)	1.7471
MA0859.1	6.69364	Rarg	Thyroid hormone receptor-related factors (NR1)	19.9466			MA0763.1	1.85362	Etv3	Ets-related	4.0129
MA1561.1	6.16772	Sox12	SOX-related factors	7.7198			MA0138.2	1.78067	Rest	Factors with multiple dispersed zinc fingers	7.031
MA0664.1	5.83394	Mlxipl	bHLH-ZIP	0.8809			MA0066.1	1.77681	Pparg	Thyroid hormone receptor-related factors (NR1)	1.6653
MA0498.2	5.67818	Meis1	TALE-type homeo domain factors	0.3538			MA1129.1	1.66911	Fosl1	Fos-related::Jun-related	4.0293
MA1946.1	5.42905	Etv5	Ets-related::FOX	46.6209			MA0502.2	1.61738	Nfyb	Heteromeric CCAAT-binding	9.7428
MA0663.1	5.36865	Mlx	bHLH-ZIP	12.1978			MA1638.1	1.6059	Hand2	Tal-related	1.215
MA1935.1	5.36347	Erf	Ets-related::FOX	36.8865			MA0100.3	1.58432	Myb	Myb/SANT domain factors	0.0626
MA0801.1	5.33052	Mga	TBX6-related factors	13.0778			MA0730.1	1.50674	Rara	Thyroid hormone receptor-related factors (NR1)	10.8355
MA0526.4	5.23463	Usf2	bHLH-ZIP	12.792			MA0670.1	1.48697	Nfia	Nuclear factor 1	0.9984
MA1957.1	5.23023	Hoxb2	HOX::Ets-related	0.136			MA0596.1	1.41214	Srebf2	bHLH-ZIP	37.3004
MA0138.2	4.80361	Rest	Factors with multiple dispersed zinc fingers	41.9246			MA1491.2	1.38521	Gli3	More than 3 adjacent zinc fingers	4.9269
MA0007.3	4.78664	Ar	Steroid hormone receptors (NR3)	0.0208			MA1117.1	1.32361	Relb	NF-kappaB-related factors	3.9624
MA0115.1	4.72808	Nr1h2	Thyroid hormone receptor-related factors (NR1)::RXR-related receptors (NR2)	20.2387			MA0093.3	1.22711	Usf1	bHLH-ZIP	11.2678
MA0087.2	4.62973	Sox5	SOX-related factors	0.0139			MA0469.3	1.17209	E2f3	E2F	8.5285
MA1931.1	4.232	Elk1	Ets-related::HOX-related factors	6.6588			MA0777.1	0.916375	Mybl2	Myb/SANT domain factors	8.1806
MA0779.1	4.13895	Pax1	Paired domain only	0.0216			MA0903.1	0.897751	Hoxb3	HOX	4.6561
MA0081.2	4.06832	Spib	Ets-related	0.0662			MA1558.1	0.829161	Snai1	More than 3 adjacent zinc fingers	35.4369
MA1500.1	3.96433	Hoxb6	HOX	0.0096			MA1116.1	0.806495	Rbpj	CSL-related factors	18.1576
MA1121.1	3.92976	Tead2	TEF-1-related factors	59.8325			MA0808.1	0.787271	Tead3	TEF-1-related factors	22.3823
MA0806.1	3.87605	Tbx4	TBX2-related factors	0.2508			MA0105.4	0.755364	Nfkb1	NF-kappaB-related factors	17.4752
MA0795.1	3.74613	Smad3	SMAD factors	1.6753			MA1532.2	0.744963	Nr1d2	Thyroid hormone receptor-related factors (NR1)	8.9895
MA0510.2	3.68817	Rfx5	RFX-related factors	2.0545			MA1567.2	0.744899	Tbx6	TBX6-related factors	0.0788
MA0723.2	3.62408	Vax2	NK	0.606			MA0112.3	0.729022	Esr1	Steroid hormone receptors (NR3)	0.0871
MA0698.1	3.5847	Zbtb18	More than 3 adjacent zinc fingers	1.9062			MA1505.1	0.710078	Hoxc8	HOX	13.9301
MA1153.1	3.539	Smad4	SMAD factors	14.8702			MA0625.2	0.672868	Nfatc3	NFAT-related factors	13.2655
MA0638.1	3.45252	Creb3	CREB-related factors	5.0956			MA1542.1	0.600021	Osr1	Other factors with up to three adjacent zinc fingers	6.0215
MA1947.1	3.29573	Etv5	Ets-related::FOX	46.6209			MA0807.1	0.561171	Tbx5	TBX2-related factors	1.1254
MA0798.3	3.15216	Rfx3	RFX-related factors	0.4714			MA0663.1	0.552458	Mlx	bHLH-ZIP	10.0959
MA1496.1	3.10772	Hoxa4	HOX	0.2425			MA1646.1	0.552195	Osr2	More than 3 adjacent zinc fingers	0.6994
MA0850.1	3.04469	Foxp3	FOX	0.0563			MA0797.1	0.504385	Tgif2	TALE-type homeo domain factors	2.7093
MA0903.1	2.87838	Hoxb3	HOX	0.0582			MA1559.1	0.447697	Snai3	More than 3 adjacent zinc fingers	0.0198
MA1535.1	2.86974	Nr2c1	RXR-related receptors (NR2)	1.0035			MA1108.2	0.438609	Mxi1	bHLH-ZIP	2.4798
MA0781.1	2.68454	Pax9	Paired domain only	0.0115			MA0731.1	0.426415	Bcl6b	More than 3 adjacent zinc fingers	0.1647
MA0100.3	2.65008	Myb	Myb/SANT domain factors	0.4292			MA1504.1	0.413688	Hoxc4	HOX	4.0031
MA0690.2	2.59695	Tbx21	TBrain-related factors	0.3552			MA0819.2	0.402106	Clock	PAS domain factors	4.9814
MA1936.1	2.42359	Erf	Ets-related::FOX	36.8865			MA0860.1	0.330183	Rarg	Thyroid hormone receptor-related factors (NR1)	19.5659
MA0647.1	2.38085	Grhl1	Grainyhead-related factors	0.7188			MA1554.1	0.294729	Rfx7	RFX-related factors	5.7293
MA0863.1	2.34941	Mtf1	More than 3 adjacent zinc fingers	3.0295			MA1470.1	0.287401	Bach2	Jun-related	0.8123
MA1651.1	2.31866	Zfp42	More than 3 adjacent zinc fingers	126.333			MA0858.1	0.255985	Rarb	Thyroid hormone receptor-related factors (NR1)	1.7471
MA0090.3	2.20123	Tead1	TEF-1-related factors	13.7222			MA0007.3	0.249382	Ar	Steroid hormone receptors (NR3)	0.4224
MA0671.1	2.19677	Nfix	Nuclear factor 1	0.4807			MA0519.1	0.202689	Stat5a	STAT factors	2.0952
MA0819.2	2.17896	Clock	PAS domain factors	2.6228			MA0698.1	0.154787	Zbtb18	More than 3 adjacent zinc fingers	3.7515
MA0777.1	2.09619	Mybl2	Myb/SANT domain factors	101.148			MA1498.2	0.152992	Hoxa7	HOX	2.4297
MA0738.1	2.0665	Hic2	Factors with multiple dispersed zinc fingers	18.0436			MA0144.2	0.149238	Stat3	STAT factors	34.3281
MA1554.1	2.06123	Rfx7	RFX-related factors	8.2117			MA1557.1	0.133335	Smad5	SMAD factors	8.3424
MA0829.2	1.86358	Srebf1	bHLH-ZIP	10.4551			MA0848.1	0.122488	Foxo4	FOX	5.8546
MA1998.1	1.76482	Prdm14	More than 3 adjacent zinc fingers	13.2249			MA1537.1	0.116579	Nr2f1	RXR-related receptors (NR2)	1.5688
MA0844.1	1.64353	Xbp1	XBP-1-related factors	23.0535			MA0902.2	0.113708	Hoxb2	HOX	11.1835
MA0774.1	1.49506	Meis2	TALE-type homeo domain factors	0.3692			MA0774.1	0.107552	Meis2	TALE-type homeo domain factors	7.719
MA1505.1	1.38316	Hoxc8	HOX	0.1873			MA1507.1	0.0806536	Hoxd4	HOX	1.0607
MA1504.1	1.38263	Hoxc4	HOX	0.4204			MA1647.2	0.0640622	Prdm4	Factors with multiple dispersed zinc fingers	13.0285
MA0002.2	1.31516	Runx1	Runt-related factors	0.0666			MA0620.3	0.0614094	Mitf	bHLH-ZIP	0.7358
MA1475.1	1.23304	Creb3l4	CREB-related factors	0.5147			MA0783.1	0.061184	Pknox2	TALE-type homeo domain factors	2.5832
MA0509.3	1.20188	Rfx1	RFX-related factors	3.0049			MA1553.1	0.0586993	Rarg	Thyroid hormone receptor-related factors (NR1)	19.5659
MA0469.3	1.19071	E2f3	E2F	7.9852			MA0017.2	0.0550914	Nr2f1	RXR-related receptors (NR2)	1.5688
MA0625.2	1.12396	Nfatc3	NFAT-related factors	9.2695			MA1996.1	0.0539428	Nr1h2	Thyroid hormone receptor-related factors (NR1)	17.5403
MA1955.1	1.09403	Foxo1	FOX::Ets-related	2.642			MA0594.2	0.0514541	Hoxa9	HOX	1.54
MA1999.1	1.08869	Prdm5	More than 3 adjacent zinc fingers	5.3579			MA0776.1	0.0233608	Mybl1	Myb/SANT domain factors	3.3967
MA0728.1	1.06434	Nr2f6	RXR-related receptors (NR2)	2.9832			MA0867.2	0.0224617	Sox4	SOX-related factors	34.0022
MA0857.1	1.0454	Rarb	Thyroid hormone receptor-related factors (NR1)	1.018			MA0056.2	0.00998883	Mzf1	More than 3 adjacent zinc fingers	0.2053
MA0692.1	0.993842	Tfeb	bHLH-ZIP	6.0183			MA0677.1	0.00657116	Nr2f6	RXR-related receptors (NR2)	23.7946
MA0519.1	0.932861	Stat5a	STAT factors	1.6194			MA0745.2	0.00631405	Snai2	More than 3 adjacent zinc fingers	34.3946
MA1420.1	0.886138	Irf5	Interferon-regulatory factors	0.9777			MA1153.1	0.00480886	Smad4	SMAD factors	23.5606
MA1624.1	0.883417	Stat5a	STAT factors	1.6194			MA0073.1	0.00309535	Rreb1	Factors with multiple dispersed zinc fingers	1.3393
MA1498.2	0.787432	Hoxa7	HOX	0.4053			MA1483.2	0.00295613	Elf2	Ets-related	7.1718
MA0775.1	0.785254	Meis3	TALE-type homeo domain factors	0.4806			MA1495.1	0.00211079	Hoxa1	HOX	1.3017
MA1507.1	0.686304	Hoxd4	HOX	0.0338			MA0795.1	0.00193881	Smad3	SMAD factors	20.0634
MA1140.2	0.653589	Junb	Jun-related	2.9201			MA0805.1	0.00181012	Tbx1	TBX1-related factors	0.748
MA0796.1	0.628142	Tgif1	TALE-type homeo domain factors	27.9281			MA0158.2	0.00177188	Hoxa5	HOX	4.7634
MA0144.2	0.611332	Stat3	STAT factors	14.5814			MA1570.1	0.00165539	Tfap4	bHLH-ZIP	2.6876
MA0729.1	0.582042	Rara	Thyroid hormone receptor-related factors (NR1)	9.0215			MA1123.2	0.000556055	Twist1	Tal-related	17.3104
MA0731.1	0.501238	Bcl6b	More than 3 adjacent zinc fingers	0.2775			MA0027.2	0.000265457	En1	NK	8.7339
MA0080.6	0.446833	Spi1	Ets-related	0.3251			MA1573.2	0.000219193	Thap11	THAP-related factors	15.4414
MA0462.2	0.442508	Batf	B-ATF-related factors::Jun-related	0.0913			MA1538.1	0.000213951	Nr2f1	RXR-related receptors (NR2)	1.5688
MA1638.1	0.417296	Hand2	Tal-related	0.0614			MA1946.1	0.000212758	Etv5	Ets-related::FOX	9.9953
MA1988.1	0.390616	Atf3	Fos-related	0.7529			MA0849.1	0.000174818	Foxo6	FOX	0.0817
MA1116.1	0.383598	Rbpj	CSL-related factors	21.2357			MA1147.1	0.000160383	Nr4a2	NGFI-B-related receptors (NR4)::RXR-related receptors (NR2)	2.9102
MA0600.2	0.369025	Rfx2	RFX-related factors	15.632			MA0855.1	0.000103999	Rxrb	RXR-related receptors (NR2)	11.4509
MA0808.1	0.354861	Tead3	TEF-1-related factors	1.2037			MA0117.2	0.000101815	Mafb	Maf-related	3.4093
MA0867.2	0.346877	Sox4	SOX-related factors	3.895			MA1973.1	5.54599e-05	Zkscan3	More than 3 adjacent zinc fingers	9.2988
MA1545.1	0.34249	Ovol2	More than 3 adjacent zinc fingers	1.3039			MA1565.1	3.9703e-05	Tbx18	TBX1-related factors	3.1852
MA1108.2	0.341298	Mxi1	bHLH-ZIP	4.0425			MA1497.1	3.76883e-05	Hoxa6	HOX	1.349
MA0869.2	0.328835	Sox11	SOX-related factors	1.8633			MA0675.1	3.36693e-05	Nkx6-2	NK	0.0098
MA1573.2	0.325516	Thap11	THAP-related factors	16.2767			MA1944.1	2.54234e-05	Etv5	Ets-related::Paired-related HD factors	9.9953
MA0841.1	0.290389	Nfe2	Jun-related	0.053			MA1616.1	2.18348e-05	Prdm15	Factors with multiple dispersed zinc fingers	2.2944
MA0463.2	0.276116	Bcl6	More than 3 adjacent zinc fingers	0.3405			MA0664.1	1.98337e-05	Mlxipl	bHLH-ZIP	0.0265
MA0670.1	0.249742	Nfia	Nuclear factor 1	0.0429			MA1948.1	1.97122e-05	Etv5	Ets-related::HOX-related factors	9.9953
MA0160.2	0.238415	Nr4a2	NGFI-B-related receptors (NR4)	0.1904			MA0018.4	1.52436e-05	Creb1	CREB-related factors	4.5032
MA0794.1	0.212158	Prox1	HD-PROS factors	0.3462			MA1566.2	1.42451e-05	Tbx3	TBX2-related factors	4.4664
MA0689.1	0.211806	Tbx20	TBX1-related factors	0.2251			MA1539.1	9.62119e-06	Nr2f6	RXR-related receptors (NR2)	23.7946
MA1134.1	0.204409	Fos	Fos-related::Jun-related	0.3461			MA0708.2	6.10941e-06	Msx2	NK	1.3708
MA0902.2	0.204085	Hoxb2	HOX	0.136			MA0796.1	4.27491e-06	Tgif1	TALE-type homeo domain factors	24.0645
MA1123.2	0.170795	Twist1	Tal-related	0.5224			MA1525.2	4.19077e-06	Nfatc4	NFAT-related factors	11.4478
MA0652.1	0.132244	Irf8	Interferon-regulatory factors	0.0688			MA1508.1	3.6578e-06	Ikzf1	Factors with multiple dispersed zinc fingers	0.8876
MA0688.1	0.0884694	Tbx2	TBX2-related factors	0.1141			MA0875.1	1.79313e-06	Barx1	NK	1.5365
MA0476.1	0.0772671	Fos	Fos-related	0.3461			MA1499.1	1.45014e-06	Hoxb4	HOX	3.4564
MA1585.1	0.0706945	Zkscan1	More than 3 adjacent zinc fingers	1.4447			MA1932.1	1.43707e-06	Elk1	Ets-related::HOX-related factors	8.334
MA1579.1	0.0658127	Zbtb26	More than 3 adjacent zinc fingers	2.1289			MA0512.2	6.00785e-07	Rxra	RXR-related receptors (NR2)	9.0774
MA1944.1	0.063776	Etv5	Ets-related::Paired-related HD factors	46.6209			MA0644.2	2.41784e-07	Esx1	Paired-related HD factors	0.0146
MA1634.1	0.058111	Batf	B-ATF-related factors	0.0913			MA1949.1	1.82057e-07	Fli1	Paired-related HD factors::Ets-related	2.9095
MA0783.1	0.0354315	Pknox2	TALE-type homeo domain factors	2.7781			MA1935.1	1.04073e-07	Erf	Ets-related::FOX	24.2775
MA1112.2	0.0334053	Nr4a1	NGFI-B-related receptors (NR4)	5.676			MA0794.1	4.54377e-08	Prox1	HD-PROS factors	0.1287
MA1953.1	0.0310215	Foxo1	FOX::Ets-related	2.642			MA0069.1	2.56048e-08	Pax6	Paired plus homeo domain	0.0034
MA1497.1	0.0224672	Hoxa6	HOX	0.0792			MA1632.1	5.13212e-09	Atf2	Jun-related	6.8165
MA0508.3	0.0201801	Prdm1	More than 3 adjacent zinc fingers	1.3787			MA1502.1	4.25229e-09	Hoxb8	HOX	8.2619
MA1101.2	0.018905	Bach2	Jun-related	0.0779			MA0074.1	2.34188e-09	Rxra	RXR-related receptors (NR2)::Thyroid hormone receptor-related factors (NR1)	9.0774
MA1144.1	0.017233	Fosl2	Fos-related::Jun-related	0.3579			MA1152.1	1.43504e-09	Sox15	SOX-related factors	0.0518
MA1625.1	0.0161999	Stat5b	STAT factors	1.4816			MA0838.1	1.04099e-09	Cebpg	CEBP-related	11.7346
MA0137.3	0.0100191	Stat1	STAT factors	1.999			MA0115.1	9.18904e-10	Nr1h2	Thyroid hormone receptor-related factors (NR1)::RXR-related receptors (NR2)	17.5403
MA0800.1	0.00950241	Eomes	TBrain-related factors	0.5558			MA1550.1	7.91163e-10	Ppard	Thyroid hormone receptor-related factors (NR1)	16.6345
MA0604.1	0.00940799	Atf1	CREB-related factors	22.6798			MA0494.1	6.70624e-10	Nr1h3	Thyroid hormone receptor-related factors (NR1)::RXR-related receptors (NR2)	0.2559
MA0069.1	0.00925347	Pax6	Paired plus homeo domain	0.3141			MA0690.2	4.93789e-10	Tbx21	TBrain-related factors	0.0028
MA0675.1	0.0089219	Nkx6-2	NK	0.3039			MA0137.3	1.49775e-10	Stat1	STAT factors	6.6372
MA1141.1	0.00885225	Fos	Fos-related::Jun-related	0.3461			MA0910.2	8.59285e-11	Hoxd8	HOX	2.138
MA1499.1	0.00832241	Hoxb4	HOX	0.2432			MA1624.1	1.81728e-11	Stat5a	STAT factors	2.0952
MA1956.1	0.00829039	Foxo1	FOX::Ets-related	2.642			MA0592.3	1.29674e-11	Esrra	Steroid hormone receptors (NR3)	11.1392
MA0515.1	0.00816376	Sox6	SOX-related factors	0.134			MA0614.1	5.81547e-12	Foxj2	FOX	5.1458
MA0027.2	0.00779294	En1	NK	0.0754			MA1625.1	4.36074e-12	Stat5b	STAT factors	5.7945
MA0644.2	0.0077379	Esx1	Paired-related HD factors	5.1254			MA1936.1	1.31939e-12	Erf	Ets-related::FOX	24.2775
MA0797.1	0.00764959	Tgif2	TALE-type homeo domain factors	6.1365			MA1954.1	1.26761e-12	Foxo1	FOX::Ets-related	1.9481
MA1932.1	0.00656304	Elk1	Ets-related::HOX-related factors	6.6588			MA1579.1	1.10387e-12	Zbtb26	More than 3 adjacent zinc fingers	1.6018
MA0051.1	0.00638068	Irf2	Interferon-regulatory factors	0.0401			MA1649.1	7.09938e-13	Zbtb12	More than 3 adjacent zinc fingers	5.5022
MA1948.1	0.00452623	Etv5	Ets-related::HOX-related factors	46.6209			MA0518.1	4.99666e-13	Stat4	STAT factors	0.0045
MA0708.2	0.00439305	Msx2	NK	0.3127			MA0904.2	4.20157e-13	Hoxb5	HOX	2.2305
MA1419.1	0.00411273	Irf4	Interferon-regulatory factors	0.003			MA1549.1	1.96144e-13	Pou6f1	POU domain factors	2.096
MA1547.2	0.00271845	Pitx2	Paired-related HD factors	3.897			MA0051.1	1.22421e-13	Irf2	Interferon-regulatory factors	8.0425
MA0158.2	0.00259242	Hoxa5	HOX	0.3771			MA0727.1	1.03087e-13	Nr3c2	Steroid hormone receptors (NR3)	0.0246
MA0477.2	0.00144633	Fosl1	Fos-related	0.0195			MA0515.1	6.45135e-14	Sox6	SOX-related factors	0.0697
MA0831.3	0.00142984	Tfe3	bHLH-ZIP	7.8107			MA0083.3	5.35684e-14	Srf	Responders to external signals (SRF/RLM1)	30.3304
MA1950.1	0.000613313	Fli1	Ets-related::FOX	0.0174			MA1950.1	3.00388e-14	Fli1	Ets-related::FOX	2.9095
MA1495.1	0.000586581	Hoxa1	HOX	1.3566			MA1420.1	2.23724e-14	Irf5	Interferon-regulatory factors	4.0702
MA1991.1	0.000515014	Hnf1a	POU domain factors	0.8123			MA1602.1	1.649e-14	Zscan29	More than 3 adjacent zinc fingers	2.3337
MA1602.1	0.000449617	Zscan29	More than 3 adjacent zinc fingers	1.0955			MA1956.1	8.10035e-15	Foxo1	FOX::Ets-related	1.9481
MA1951.1	0.000434027	Fos	Fos-related	0.3461			MA0463.2	1.88044e-15	Bcl6	More than 3 adjacent zinc fingers	4.0029
MA1135.1	0.000425595	Fosb	Fos-related::Jun-related	0.0277			MA0081.2	4.82164e-16	Spib	Ets-related	0.0026
MA1570.1	0.000379526	Tfap4	bHLH-ZIP	8.5711			MA1119.1	3.85731e-16	Six2	HD-SINE	1.2983
MA0113.3	0.000297244	Nr3c1	Steroid hormone receptors (NR3)	1.2845			MA0900.2	9.64327e-17	Hoxa2	HOX	0.7865
MA0653.1	0.000185573	Irf9	Interferon-regulatory factors	4.4237			MA1955.1	9.64327e-17	Foxo1	FOX::Ets-related	1.9481
MA0093.3	0.000150435	Usf1	bHLH-ZIP	25.1674			MA1999.1	9.64327e-17	Prdm5	More than 3 adjacent zinc fingers	6.6707
MA1502.1	9.43882e-05	Hoxb8	HOX	0.0325			MA0684.2	4.82164e-17	Runx3	Runt-related factors	3.8911
MA0828.2	8.85555e-05	Srebf2	bHLH-ZIP	48.5707			MA0038.2	0	Gfi1	More than 3 adjacent zinc fingers	0.0131
MA0809.2	7.9911e-05	Tead4	TEF-1-related factors	5.0188			MA0060.3	0	Nfya	NFY	14.5138
MA1949.1	5.6119e-05	Fli1	Paired-related HD factors::Ets-related	0.0174			MA0031.1	0	Foxd1	FOX	2.5611
MA0771.1	3.2343e-05	Hsf4	HSF factors	0.047			MA0032.2	0	Foxc1	FOX	3.3758
MA0518.1	3.00873e-05	Stat4	STAT factors	3.9324			MA0019.1	0	Ddit3	CEBP-related	44.9206
MA0910.2	2.53763e-05	Hoxd8	HOX	0.0717			MA0071.1	0	Rora	Thyroid hormone receptor-related factors (NR1)	0.6368
MA0875.1	1.18852e-05	Barx1	NK	0.1875			MA0036.3	0	Gata2	C4-GATA-related	2.4075
MA0693.3	8.08533e-06	Vdr	Thyroid hormone receptor-related factors (NR1)	0.3318			MA0025.2	0	Nfil3	CEBP-related	18.1426
MA1130.1	4.07904e-06	Fosl2	Fos-related::Jun-related	0.3579			MA0037.4	0	Gata3	C4-GATA-related	0.8275
MA0727.1	3.99672e-06	Nr3c2	Steroid hormone receptors (NR3)	0.1991			MA0072.1	0	Rora	Thyroid hormone receptor-related factors (NR1)	0.6368
MA0835.2	3.30906e-06	Batf3	B-ATF-related factors	0.3582			MA0030.1	0	Foxf2	FOX	1.0199
MA1152.1	2.45168e-06	Sox15	SOX-related factors	14.8938			MA0070.1	0	Pbx1	TALE-type homeo domain factors	5.645
MA0853.1	1.62035e-06	Alx4	Paired-related HD factors	0.0094			MA0052.4	0	Mef2a	Regulators of differentiation	11.6758
MA0099.3	1.17282e-06	Fos	Fos-related::Jun-related	0.3461			MA0050.3	0	Irf1	Interferon-regulatory factors	6.4116
MA1132.1	1.09703e-06	Jun	Jun-related	1.1869			MA0046.2	0	Hnf1a	POU domain factors	0.0211
MA1525.2	8.18191e-07	Nfatc4	NFAT-related factors	5.0479			MA0041.2	0	Foxd3	FOX	0.1248
MA1501.1	1.68915e-07	Hoxb7	HOX	0.2707			MA0029.1	0	Mecom	Factors with multiple dispersed zinc fingers	3.4789
MA2001.1	1.25316e-07	Six4	HD-SINE	5.1772			MA0862.1	0	Gmeb2	GMEB	5.4539
MA0848.1	5.52853e-08	Foxo4	FOX	7.9689			MA0883.1	0	Dmbx1	Paired-related HD factors	0.0016
MA0880.1	4.52493e-08	Dlx3	NK	0.3455			MA0869.2	0	Sox11	SOX-related factors	5.1024
MA0716.1	2.69643e-08	Prrx1	Paired-related HD factors	0.2135			MA0885.2	0	Dlx2	NK	1.4377
MA0514.2	2.25548e-08	Sox3	SOX-related factors	0.3888			MA0895.1	0	Hmbox1	POU domain factors	4.1985
MA0483.1	1.37258e-08	Gfi1b	More than 3 adjacent zinc fingers	0.0111			MA0886.1	0	Emx2	NK	8.3661
MA0768.2	1.00554e-08	Lef1	TCF-7-related factors	1.186			MA0854.1	0	Alx1	Paired-related HD factors	0.4597
MA0720.1	8.09702e-09	Shox2	Paired-related HD factors	0.0702			MA0866.1	0	Sox21	SOX-related factors	0.012
MA0117.2	7.38806e-09	Mafb	Maf-related	0.0304			MA0890.1	0	Gbx2	HOX	0.3805
MA1421.1	2.04458e-09	Tcf7l1	TCF-7-related factors	34.7906			MA0878.3	0	Cdx1	HOX	0.0046
MA1128.1	2.02065e-09	Fosl1	Fos-related::Jun-related	0.0195			MA0894.1	0	Hesx1	Paired-related HD factors	0.0339
MA1544.1	5.53718e-10	Ovol1	More than 3 adjacent zinc fingers	0.0835			MA0859.1	0	Rarg	Thyroid hormone receptor-related factors (NR1)	19.5659
MA0491.2	3.34746e-10	Jund	Jun-related	16.4336			MA0899.1	0	Hoxa10	HOX	2.9192
MA0682.2	2.45955e-10	Pitx1	Paired-related HD factors	0.1701			MA0901.2	0	Hoxb13	HOX	0.0286
MA0642.2	1.38972e-10	En2	NK	1.2667			MA0857.1	0	Rarb	Thyroid hormone receptor-related factors (NR1)	1.7471
MA0507.2	1.32146e-10	Pou2f2	POU domain factors	0.7184			MA1112.2	0	Nr4a1	NGFI-B-related receptors (NR4)	15.44
MA1137.1	1.27308e-10	Fosl1	Fos-related::Jun-related	0.0195			MA0905.1	0	Hoxc10	HOX	10.91
MA1142.1	7.55057e-11	Fosl1	Fos-related::Jun-related	0.0195			MA1120.1	0	Sox13	SOX-related factors	1.095
MA1549.1	6.36977e-11	Pou6f1	POU domain factors	1.6739			MA1111.1	0	Nr2f2	RXR-related receptors (NR2)	6.9312
MA0900.2	5.21323e-11	Hoxa2	HOX	0.1065			MA0913.2	0	Hoxd9	HOX	0.9684
MA0904.2	5.21323e-11	Hoxb5	HOX	0.0176			MA1103.2	0	Foxk2	FOX	23.3541
MA1120.1	3.83211e-11	Sox13	SOX-related factors	4.9627			MA0906.1	0	Hoxc12	HOX	0.188
MA0648.1	7.03988e-12	Gsc	Paired-related HD factors	1.1949			MA1105.2	0	Grhl2	Grainyhead-related factors	0.0072
MA0712.2	5.4796e-12	Otx2	Paired-related HD factors	0.6757			MA1118.1	0	Six1	HD-SINE	4.6279
MA0143.4	3.99314e-12	Sox2	SOX-related factors	90.2391			MA0909.3	0	Hoxd13	HOX	0.1435
MA0466.3	3.35345e-12	Cebpb	CEBP-related	0.9534			MA0911.1	0	Hoxa11	HOX	0.9112
MA0862.1	1.26134e-12	Gmeb2	GMEB	4.9101			MA1113.2	0	Pbx2	TALE-type homeo domain factors	10.1603
MA1418.1	1.03901e-12	Irf3	Interferon-regulatory factors	7.9774			MA0907.1	0	Hoxc13	HOX	0.3897
MA0769.2	7.50632e-13	Tcf7	TCF-7-related factors	10.1621			MA1104.2	0	Gata6	C4-GATA-related	1.7502
MA1138.1	4.68856e-13	Fosl2	Fos-related::Jun-related	0.3579			MA1478.1	0	Dmrta2	DMRT factors	0.4972
MA1470.1	1.28738e-13	Bach2	Jun-related	0.0779			MA1489.1	0	Foxn3	FOX	4.3239
MA0866.1	6.51885e-14	Sox21	SOX-related factors	0.987			MA1421.1	0	Tcf7l1	TCF-7-related factors	10.3881
MA1509.1	1.79365e-14	Irf6	Interferon-regulatory factors	0.8027			MA1419.1	0	Irf4	Interferon-regulatory factors	0.005
MA0770.1	1.03665e-14	Hsf2	HSF factors	13.1802			MA1418.1	0	Irf3	Interferon-regulatory factors	13.4444
MA1633.2	5.49667e-15	Bach1	Jun-related	7.9317			MA1547.2	0	Pitx2	Paired-related HD factors	0.9641
MA0890.1	2.89298e-15	Gbx2	HOX	2.8113			MA1501.1	0	Hoxb7	HOX	7.0091
MA0870.1	2.02509e-15	Sox1	SOX-related factors	0.8228			MA1509.1	0	Irf6	Interferon-regulatory factors	0.0293
MA1119.1	1.97687e-15	Six2	HD-SINE	0.1064			MA1503.1	0	Hoxb9	HOX	29.2381
MA0594.2	8.67895e-16	Hoxa9	HOX	0.0361			MA1544.1	0	Ovol1	More than 3 adjacent zinc fingers	0.055
MA0523.1	6.26813e-16	Tcf7l2	TCF-7-related factors	2.8834			MA1541.1	0	Nr6a1	GCNF-related receptors (NR6)	0.4147
MA0083.3	3.85731e-16	Srf	Responders to external signals (SRF/RLM1)	8.213			MA1608.1	0	Isl1	HD-LIM	0.2091
MA0661.1	9.64327e-17	Meox1	HOX	0.0227			MA1606.1	0	Foxf1	FOX	3.6048
MA0031.1	0	Foxd1	FOX	0.0596			MA1580.1	0	Zbtb32	Other factors with up to three adjacent zinc fingers	0.0989
MA0038.2	0	Gfi1	More than 3 adjacent zinc fingers	0.0425			MA1585.1	0	Zkscan1	More than 3 adjacent zinc fingers	2.4019
MA0060.3	0	Nfya	NFY	13.6414			MA1561.1	0	Sox12	SOX-related factors	5.6802
MA0032.2	0	Foxc1	FOX	0.0422			MA1644.1	0	Nfyc	Heteromeric CCAAT-binding	15.8979
MA0019.1	0	Ddit3	CEBP-related	7.2371			MA1639.1	0	Meis1	TALE-type homeo domain factors	8.1317
MA0036.3	0	Gata2	C4-GATA-related	0.6809			MA1636.1	0	Cebpg	CEBP-related	11.7346
MA0037.4	0	Gata3	C4-GATA-related	0.5772			MA1623.1	0	Stat2	STAT factors	7.3947
MA0018.4	0	Creb1	CREB-related factors	5.4231			MA1640.1	0	Meis2	TALE-type homeo domain factors	7.719
MA0025.2	0	Nfil3	CEBP-related	2.8367			MA1947.1	0	Etv5	Ets-related::FOX	9.9953
MA0072.1	0	Rora	Thyroid hormone receptor-related factors (NR1)	0.0842			MA1952.1	0	Foxj2	FOX::Ets-related	5.1458
MA0030.1	0	Foxf2	FOX	0.021			MA1953.1	0	Foxo1	FOX::Ets-related	1.9481
MA0050.3	0	Irf1	Interferon-regulatory factors	4.921			MA1937.1	0	Erf	Ets-related::HOX-related factors	24.2775
MA0070.1	0	Pbx1	TALE-type homeo domain factors	0.6102			MA1960.1	0	Mga	TBX6-related factors::HOX	3.8375
MA0041.2	0	Foxd3	FOX	1.6234			MA2001.1	0	Six4	HD-SINE	1.343
MA0046.2	0	Hnf1a	POU domain factors	0.8123			MA1968.1	0	Tfcp2	CP2-related factors	3.3072
MA0052.4	0	Mef2a	Regulators of differentiation	1.6269			MA1991.1	0	Hnf1a	POU domain factors	0.0211
MA0029.1	0	Mecom	Factors with multiple dispersed zinc fingers	0.0581			MA1963.1	0	Satb1	HD-CUT	0.482
MA0885.2	0	Dlx2	NK	0.0706			MA1970.1	0	Trps1	C4-GATA-related	0.9587
MA0883.1	0	Dmbx1	Paired-related HD factors	0.2335			MA1998.1	0	Prdm14	More than 3 adjacent zinc fingers	0.0031
MA0854.1	0	Alx1	Paired-related HD factors	0.0267			MA1962.1	0	Pou2f1	POU domain factors::SOX-related factors	0.6674
MA0894.1	0	Hesx1	Paired-related HD factors	7.3555			MA0124.2	0	Nkx3-1	NK	0.0052
MA0886.1	0	Emx2	NK	0.0579			MA0091.1	0	Tal1	Tal-related::E2A	0.2264
MA0895.1	0	Hmbox1	POU domain factors	4.1165			MA0075.3	0	Prrx2	Paired-related HD factors	26.4362
MA0878.3	0	Cdx1	HOX	3.5193			MA0095.3	0	Yy1	More than 3 adjacent zinc fingers	31.8597
MA0899.1	0	Hoxa10	HOX	0.1795			MA0077.1	0	Sox9	SOX-related factors	3.3405
MA0901.2	0	Hoxb13	HOX	1.9855			MA0102.4	0	Cebpa	CEBP-related	3.0169
MA1115.1	0	Pou5f1	POU domain factors	393.847			MA0141.3	0	Esrrb	Steroid hormone receptors (NR3)	0.0081
MA0905.1	0	Hoxc10	HOX	0.1023			MA0087.2	0	Sox5	SOX-related factors	0.104
MA1103.2	0	Foxk2	FOX	12.204			MA0080.6	0	Spi1	Ets-related	7.8007
MA0913.2	0	Hoxd9	HOX	0.2191			MA0113.3	0	Nr3c1	Steroid hormone receptors (NR3)	7.9105
MA0909.3	0	Hoxd13	HOX	0.4397			MA0479.1	0	Foxh1	FOX	0.0111
MA1118.1	0	Six1	HD-SINE	3.0328			MA0151.1	0	Arid3a	ARID-related	3.3885
MA0911.1	0	Hoxa11	HOX	0.0345			MA0160.2	0	Nr4a2	NGFI-B-related receptors (NR4)	2.9102
MA1133.1	0	Jun	Jun-related	1.1869			MA0143.4	0	Sox2	SOX-related factors	0.0445
MA1131.1	0	Fosl2	Fos-related::Jun-related	0.3579			MA0480.2	0	Foxo1	FOX	1.9481
MA1136.1	0	Fosb	Fos-related::Jun-related	0.0277			MA0157.3	0	Foxo3	FOX	6.5713
MA0906.1	0	Hoxc12	HOX	1.2865			MA0481.3	0	Foxp1	FOX	16.4311
MA1104.2	0	Gata6	C4-GATA-related	0.2611			MA0152.2	0	Nfatc2	NFAT-related factors	0.3563
MA0907.1	0	Hoxc13	HOX	1.9025			MA0485.2	0	Hoxc9	HOX	8.3285
MA1129.1	0	Fosl1	Fos-related::Jun-related	0.0195			MA0148.4	0	Foxa1	FOX	0.1045
MA1127.1	0	Fosb	Fos-related::Jun-related	0.0277			MA0482.2	0	Gata4	C4-GATA-related	0.004
MA1126.1	0	Fos	Fos-related::Jun-related	0.3461			MA0153.2	0	Hnf1b	POU domain factors	0.0025
MA1113.2	0	Pbx2	TALE-type homeo domain factors	20.4121			MA0508.3	0	Prdm1	More than 3 adjacent zinc fingers	1.041
MA1143.1	0	Fosl1	Fos-related::Jun-related	0.0195			MA0523.1	0	Tcf7l2	TCF-7-related factors	3.4352
MA1489.1	0	Foxn3	FOX	3.6117			MA0492.1	0	Jund	Jun-related	30.6207
MA1478.1	0	Dmrta2	DMRT factors	0.121			MA0520.1	0	Stat6	STAT factors	24.4252
MA1145.1	0	Fosl2	Fos-related::Jun-related	0.3579			MA0593.1	0	Foxp2	FOX	0.5623
MA1139.1	0	Fosl2	Fos-related::Jun-related	0.3579			MA0488.1	0	Jun	Jun-related	40.3184
MA1503.1	0	Hoxb9	HOX	1.6853			MA0497.1	0	Mef2c	Regulators of differentiation	0.6193
MA1608.1	0	Isl1	HD-LIM	0.313			MA0495.3	0	Maff	Maf-related	11.8216
MA1606.1	0	Foxf1	FOX	0.0251			MA0517.1	0	Stat1	STAT factors	6.6372
MA1580.1	0	Zbtb32	Other factors with up to three adjacent zinc fingers	2.6345			MA0486.2	0	Hsf1	HSF factors	25.6632
MA1603.1	0	Dmrt1	DMRT factors	18.4975			MA0507.2	0	Pou2f2	POU domain factors	0.4017
MA1644.1	0	Nfyc	Heteromeric CCAAT-binding	17.112			MA0642.2	0	En2	NK	0.0066
MA1623.1	0	Stat2	STAT factors	6.7103			MA0624.2	0	Nfatc1	NFAT-related factors	2.9151
MA1632.1	0	Atf2	Jun-related	8.3924			MA0648.1	0	Gsc	Paired-related HD factors	1.2578
MA1639.1	0	Meis1	TALE-type homeo domain factors	0.3538			MA0639.1	0	Dbp	CEBP-related	1.7813
MA1636.1	0	Cebpg	CEBP-related	5.5602			MA0607.2	0	Bhlha15	Tal-related	0.0227
MA1640.1	0	Meis2	TALE-type homeo domain factors	0.3692			MA0634.1	0	Alx3	Paired-related HD factors	0.601
MA1952.1	0	Foxj2	FOX::Ets-related	1.835			MA0606.2	0	Nfat5	NFAT-related factors	5.7453
MA1937.1	0	Erf	Ets-related::HOX-related factors	36.8865			MA0613.1	0	Foxg1	FOX	0.4511
MA1960.1	0	Mga	TBX6-related factors::HOX	13.0778			MA0647.1	0	Grhl1	Grainyhead-related factors	0.0354
MA1970.1	0	Trps1	C4-GATA-related	1.8026			MA0628.1	0	Pou6f1	POU domain factors	2.096
MA1963.1	0	Satb1	HD-CUT	0.3721			MA0601.1	0	Arid3b	ARID-related	0.9223
MA0077.1	0	Sox9	SOX-related factors	0.0132			MA0627.2	0	Pou2f3	POU domain factors	0.0221
MA0124.2	0	Nkx3-1	NK	0.3366			MA0652.1	0	Irf8	Interferon-regulatory factors	1.7767
MA0075.3	0	Prrx2	Paired-related HD factors	1.0112			MA0602.1	0	Arid5a	ARID-related	1.5914
MA0095.3	0	Yy1	More than 3 adjacent zinc fingers	24.712			MA0688.1	0	Tbx2	TBX2-related factors	1.0706
MA0091.1	0	Tal1	Tal-related::E2A	0.0431			MA0693.3	0	Vdr	Thyroid hormone receptor-related factors (NR1)	2.0156
MA0102.4	0	Cebpa	CEBP-related	0.6764			MA0661.1	0	Meox1	HOX	0.9962
MA0151.1	0	Arid3a	ARID-related	1.5809			MA0689.1	0	Tbx20	TBX1-related factors	0.0112
MA0479.1	0	Foxh1	FOX	16.2706			MA0658.1	0	Lhx6	HD-LIM	0.2689
MA0480.2	0	Foxo1	FOX	2.642			MA0682.2	0	Pitx1	Paired-related HD factors	1.9837
MA0157.3	0	Foxo3	FOX	9.7252			MA0678.1	0	Olig2	Tal-related	0.0029
MA0482.2	0	Gata4	C4-GATA-related	0.3897			MA0701.2	0	Lhx9	HD-LIM	1.1246
MA0481.3	0	Foxp1	FOX	1.9645			MA0687.1	0	Spic	Ets-related	0.0056
MA0485.2	0	Hoxc9	HOX	0.0615			MA0700.2	0	Lhx2	HD-LIM	0.0577
MA0152.2	0	Nfatc2	NFAT-related factors	0.4714			MA0653.1	0	Irf9	Interferon-regulatory factors	10.6082
MA0148.4	0	Foxa1	FOX	0.3108			MA0720.1	0	Shox2	Paired-related HD factors	3.6069
MA0153.2	0	Hnf1b	POU domain factors	0.102			MA0716.1	0	Prrx1	Paired-related HD factors	37.6635
MA0520.1	0	Stat6	STAT factors	5.6669			MA0712.2	0	Otx2	Paired-related HD factors	0.0023
MA0593.1	0	Foxp2	FOX	0.003			MA0703.2	0	Lmx1b	HD-LIM	0.3626
MA0490.2	0	Junb	Jun-related	2.9201			MA0728.1	0	Nr2f6	RXR-related receptors (NR2)	23.7946
MA0497.1	0	Mef2c	Regulators of differentiation	0.0006			MA0729.1	0	Rara	Thyroid hormone receptor-related factors (NR1)	10.8355
MA0492.1	0	Jund	Jun-related	16.4336			MA0800.1	0	Eomes	TBrain-related factors	0.0749
MA0488.1	0	Jun	Jun-related	1.1869			MA0769.2	0	Tcf7	TCF-7-related factors	0.8336
MA0517.1	0	Stat1	STAT factors	1.999			MA0771.1	0	Hsf4	HSF factors	0.5177
MA0486.2	0	Hsf1	HSF factors	15.6228			MA0768.2	0	Lef1	TCF-7-related factors	2.5796
MA0495.3	0	Maff	Maf-related	0.9471			MA0770.1	0	Hsf2	HSF factors	7.1089
MA0634.1	0	Alx3	Paired-related HD factors	0.018			MA0785.1	0	Pou2f1	POU domain factors	0.6674
MA0627.2	0	Pou2f3	POU domain factors	0.4084			MA0756.2	0	Onecut2	HD-CUT	0.0359
MA0614.1	0	Foxj2	FOX	1.835			MA0786.1	0	Pou3f1	POU domain factors	0.0149
MA0624.2	0	Nfatc1	NFAT-related factors	0.1128			MA0773.1	0	Mef2d	Regulators of differentiation	16.0101
MA0610.1	0	Dmrt3	DMRT factors	0.9014			MA0772.1	0	Irf7	Interferon-regulatory factors	4.122
MA0613.1	0	Foxg1	FOX	0.0743			MA0755.1	0	Cux2	HD-CUT	0.0082
MA0620.3	0	Mitf	bHLH-ZIP	1.9539			MA0788.1	0	Pou3f3	POU domain factors	0.6564
MA0628.1	0	Pou6f1	POU domain factors	1.6739			MA0790.1	0	Pou4f1	POU domain factors	0.0083
MA0606.2	0	Nfat5	NFAT-related factors	2.0605			MA0754.2	0	Cux1	HD-CUT	6.0269
MA0601.1	0	Arid3b	ARID-related	21.0542			MA0846.1	0	Foxc2	FOX	11.4974
MA0639.1	0	Dbp	CEBP-related	0.3169			MA0847.3	0	Foxd2	FOX	0.3573
MA0605.2	0	Atf3	Fos-related	0.7529			MA0818.2	0	Bhlhe22	Tal-related	0.3041
MA0607.2	0	Bhlha15	Tal-related	0.4519			MA0836.2	0	Cebpd	CEBP-related	5.221
MA0623.2	0	Neurog1	Tal-related	0.545			MA0826.1	0	Olig1	Tal-related	0.0037
MA0602.1	0	Arid5a	ARID-related	0.5596			MA0833.2	0	Atf4	ATF-4-related factors	153.726
MA0684.2	0	Runx3	Runt-related factors	0.2523			MA0852.2	0	Foxk1	FOX	7.7228
MA0658.1	0	Lhx6	HD-LIM	0.3553			MA0843.1	0	Tef	CEBP-related	7.6124
MA0701.2	0	Lhx9	HD-LIM	0.0083			MA0829.2	0	Srebf1	bHLH-ZIP	20.4857
MA0687.1	0	Spic	Ets-related	2.2628			MA0851.1	0	Foxj3	FOX	9.047
MA0655.1	0	Jdp2	Fos-related	5.1019			MA0828.2	0	Srebf2	bHLH-ZIP	37.3004
MA0700.2	0	Lhx2	HD-LIM	0.4325			MA0853.1	0	Alx4	Paired-related HD factors	2.3822
MA0656.1	0	Jdp2	Fos-related	5.1019
MA0678.1	0	Olig2	Tal-related	3.0907
MA0683.1	0	Pou4f2	POU domain factors	0.4349
MA0703.2	0	Lmx1b	HD-LIM	1.8454
MA0785.1	0	Pou2f1	POU domain factors	3.4713
MA0786.1	0	Pou3f1	POU domain factors	0.4135
MA0788.1	0	Pou3f3	POU domain factors	0.131
MA0756.2	0	Onecut2	HD-CUT	0.0555
MA0772.1	0	Irf7	Interferon-regulatory factors	0.0546
MA0755.1	0	Cux2	HD-CUT	0.8284
MA0773.1	0	Mef2d	Regulators of differentiation	7.8554
MA0754.2	0	Cux1	HD-CUT	1.9969
MA0790.1	0	Pou4f1	POU domain factors	0.5617
MA0849.1	0	Foxo6	FOX	0.5879
MA0846.1	0	Foxc2	FOX	0.0601
MA0847.3	0	Foxd2	FOX	0.0372
MA0852.2	0	Foxk1	FOX	2.6163
MA0836.2	0	Cebpd	CEBP-related	0.3
MA0838.1	0	Cebpg	CEBP-related	5.5602
MA0818.2	0	Bhlhe22	Tal-related	0.0778
MA0843.1	0	Tef	CEBP-related	3.9547
MA0826.1	0	Olig1	Tal-related	3.2486
MA0851.1	0	Foxj3	FOX	9.5614
MA0833.2	0	Atf4	ATF-4-related factors	111.162
MA0840.1	0	Creb5	CREB-related factors	0.0279
MA0834.1	0	Atf7	Jun-related	1.9425

## Sheet: Table S4
compact sets
ESC					MEF
TF	(-1)*Log10(pValue)	matrixID	family		TF	(-1)*Log10(pValue)	matrixID	family
Nfic	34.4852	MA1527.1	Nuclear_factor_1		Nr1d1	10.0811	MA1531.1	Thyroid_hormone_receptor-related_factors_(NR1)
Nr1h2	9.81615	MA1996.1	Thyroid_hormone_receptor-related_factors_(NR1)		Nfic	159.413	MA1527.1	Nuclear_factor_1
Rarg	36.6567	MA0860.1	Thyroid_hormone_receptor-related_factors_(NR1)		Runx2	20.1106	MA0511.2	Runt-related_factors
Ppard	102.535	MA1550.1	Thyroid_hormone_receptor-related_factors_(NR1)		Xbp1	43.4494	MA0844.1	XBP-1-related_factors
Nr1d2	17.6307	MA1532.2	Thyroid_hormone_receptor-related_factors_(NR1)		Zfp57	105.442	MA1583.1	Factors_with_multiple_dispersed_zinc_fingers
Pou5f1	33.1325	MA0142.1	POU_domain_factors::SOX-related_factors		Bnc2	169.288	MA1928.1	Factors_with_multiple_dispersed_zinc_fingers
Pou2f1	19.3048	MA1962.1	POU_domain_factors::SOX-related_factors		Zkscan5	7.96742	MA1652.1	Factors_with_multiple_dispersed_zinc_fingers
Sox12	6.16772	MA1561.1	SOX-related_factors		Myc	19.7272	MA0147.3	bHLH-ZIP
Zfp57	211.787	MA1583.1	Factors_with_multiple_dispersed_zinc_fingers		Tfap4	9.88698	MA0691.1	bHLH-ZIP
Prdm4	19.9591	MA1647.2	Factors_with_multiple_dispersed_zinc_fingers		Creb3l1	28.9351	MA0839.1	CREB-related_factors
Zkscan5	91.7523	MA1652.1	Factors_with_multiple_dispersed_zinc_fingers		Tfap4	44.8658	MA1966.1	bHLH-ZIP::Ets-related
Prdm15	11.0402	MA1616.1	Factors_with_multiple_dispersed_zinc_fingers		Nfic	76.145	MA0119.1	Nuclear_factor_1::NK
Rreb1	61.0535	MA0073.1	Factors_with_multiple_dispersed_zinc_fingers		Thap1	81.7826	MA0597.2	THAP-related_factors
Srebf2	6.70818	MA0596.1	bHLH-ZIP		Klf6	36.7573	MA1517.1	Three-zinc_finger_Kruppel-related
Mnt	58.1314	MA0825.1	bHLH-ZIP		Egr1	59.4224	MA0162.4	Three-zinc_finger_Kruppel-related
Nfic	11.3378	MA0119.1	Nuclear_factor_1::NK		Klf16	59.732	MA0741.1	Three-zinc_finger_Kruppel-related
Tfap4	291.375	MA1966.1	bHLH-ZIP::Ets-related		Sp1	90.8441	MA0079.5	Three-zinc_finger_Kruppel-related
Tfcp2l1	269.172	MA0145.2	CP2-related_factors		Klf10	102.355	MA1511.2	Three-zinc_finger_Kruppel-related
Tfcp2	7.09808	MA1968.1	CP2-related_factors		Sp2	96.7882	MA0516.3	Three-zinc_finger_Kruppel-related
Thap1	264.923	MA0597.2	THAP-related_factors		Klf7	117.939	MA1959.1	Three-zinc_finger_Kruppel-related
Mybl1	10.234	MA0776.1	Myb/SANT_domain_factors		Gmeb1	49.5452	MA0615.1	GMEB
Nr6a1	120.274	MA1541.1	GCNF-related_receptors_(NR6)		Elk1	15.5977	MA1933.1	Ets-related::bHLH-ZIP
Klf4	307.653	MA0039.4	Three-zinc_finger_Kruppel-related		Smad2	11.8475	MA1964.1	SMAD_factors
Sp1	307.653	MA0079.5	Three-zinc_finger_Kruppel-related		Rfx1	11.4417	MA0509.3	RFX-related_factors
Gmeb1	54.1753	MA0615.1	GMEB		Maz	62.811	MA1522.1	More_than_3_adjacent_zinc_fingers
Esrrb	187.021	MA0141.3	Steroid_hormone_receptors_(NR3)		Ctcf	12.8753	MA0139.1	More_than_3_adjacent_zinc_fingers
Erf	17.2515	MA1939.1	Ets-related::bHLH-ZIP		Glis2	37.0844	MA0736.1	More_than_3_adjacent_zinc_fingers
Smad2	28.0579	MA1964.1	SMAD_factors		Vezf1	57.0315	MA1578.1	More_than_3_adjacent_zinc_fingers
Smad5	30.3717	MA1557.1	SMAD_factors		Zbtb7a	76.2761	MA0750.2	More_than_3_adjacent_zinc_fingers
Maz	307.653	MA1522.1	More_than_3_adjacent_zinc_fingers		Plagl1	126.692	MA1615.1	More_than_3_adjacent_zinc_fingers
Ctcf	149.583	MA0139.1	More_than_3_adjacent_zinc_fingers		Zbtb6	49.7341	MA1581.1	More_than_3_adjacent_zinc_fingers
Glis2	226.754	MA0736.1	More_than_3_adjacent_zinc_fingers		Hes1	107.373	MA1099.2	Hairy-related_factors
Gli2	210.087	MA0734.3	More_than_3_adjacent_zinc_fingers		Tcf3	25.8112	MA0522.3	E2A
Zbtb12	17.9038	MA1649.1	More_than_3_adjacent_zinc_fingers		Mafg	307.653	MA0089.2	Maf-related::Jun-related
Vezf1	307.653	MA1578.1	More_than_3_adjacent_zinc_fingers		Maf	251.135	MA0501.1	Maf-related::Jun-related
Plagl1	307.649	MA1615.1	More_than_3_adjacent_zinc_fingers		Ebf1	73.3875	MA0154.4	Early_B-Cell_Factor-related_factors
Zbtb7b	165.603	MA0694.1	More_than_3_adjacent_zinc_fingers		Tead1	24.9916	MA0090.3	TEF-1-related_factors
Zbtb7a	277.436	MA0750.2	More_than_3_adjacent_zinc_fingers		Zbtb33	37.3234	MA0527.1	Other_factors_with_up_to_three_adjacent_zinc_fingers
Plagl2	307.653	MA1548.1	More_than_3_adjacent_zinc_fingers		Rela	26.1967	MA0107.1	NF-kappaB-related_factors
Zbtb6	295.894	MA1581.1	More_than_3_adjacent_zinc_fingers		Tfdp1	134.312	MA1122.1	E2F
Hes1	116.338	MA1099.2	Hairy-related_factors		E2f4	14.3487	MA0470.2	E2F
Rara	168.33	MA1149.1	Thyroid_hormone_receptor-related_factors_(NR1)::RXR-related_receptors_(NR2)		Fosl2	156.896	MA1144.1	Fos-related::Jun-related
Tcf3	266.171	MA0522.3	E2A		Elk3	88.2055	MA0759.2	Ets-related
Tfap2c	307.653	MA0524.2	AP-2		Ets2	5.35847	MA1484.1	Ets-related
Mafg	50.4804	MA0659.3	Maf-related		Elk4	14.0265	MA0076.2	Ets-related
Etv5	5.42905	MA1946.1	Ets-related::FOX		Hif1a	70.6792	MA1106.1	PAS_domain_factors
Nfkb1	62.4638	MA0105.4	NF-kappaB-related_factors		Arntl	15.7628	MA0603.1	PAS_domain_factors
Relb	29.7789	MA1117.1	NF-kappaB-related_factors		Jdp2	307.653	MA0655.1	Fos-related
Nr5a2	193.386	MA0505.2	FTZF1related(NR5A)		Cebpb	26.9098	MA0466.3	CEBP-related
Mga	5.33052	MA0801.1	TBX6-related_factors		Pbx3	56.5647	MA1114.1	TALE-type_homeo_domain_factors
Rxra	24.7832	MA0074.1	RXR-related_receptors_(NR2)::Thyroid_hormone_receptor-related_factors_(NR1)		Junb	218.317	MA0490.2	Jun-related
Tbx3	6.82553	MA1566.2	TBX2-related_factors		Nrf1	69.1568	MA0506.2	Jun-related
Tfdp1	307.653	MA1122.1	E2F		Bach1	307.653	MA0591.1	Jun-related::Maf-related
E2f4	81.8089	MA0470.2	E2F		Nr2c2	18.9422	MA0504.1	RXR-related_receptors_(NR2)
Etv5	126.79	MA0765.3	Ets-related		Erf	29.9015	MA1938.1	Ets-related::Tal-related
Elf3	21.707	MA0640.2	Ets-related		Etv5	26.9928	MA1945.1	Ets-related::Tal-related
Gabpa	27.0134	MA0062.3	Ets-related		Twist2	25.1743	MA0633.2	Tal-related
Ets2	25.6988	MA1484.1	Ets-related
Sohlh2	82.924	MA1560.1	PAS_domain_factors
Hif1a	176.586	MA1106.1	PAS_domain_factors
Arntl	15.578	MA0603.1	PAS_domain_factors
Pknox1	8.34491	MA0782.2	TALE-type_homeo_domain_factors
Zeb1	64.1864	MA0103.3	HD-ZF_factors
Nfe2l2	48.7799	MA0150.2	Jun-related
Nrf1	116.143	MA0506.2	Jun-related
Atf6	11.2845	MA1466.1	Jun-related
Nfyb	10.9897	MA0502.2	Heteromeric_CCAAT-binding
Bach1	92.3543	MA0591.1	Jun-related::Maf-related
Foxo1	13.6239	MA1954.1	FOX::Ets-related
Rxrb	43.4182	MA0855.1	RXR-related_receptors_(NR2)
Etv5	289.13	MA1945.1	Ets-related::Tal-related
Msc	48.3107	MA0665.1	Tal-related
